# Supplementary material
Source: PubMed Central journal article supplement (PMC7115586)

## Supplementary Data

### **The synthesis, antiviral, cytostatic and cytotoxic evaluation of a new series of acyclonucleotide analogues with a 1,2,3-triazole linker**

Iwona E. Głowacka\*<sup>a</sup>, Jan Balzarini<sup>b</sup> and Andrzej E. Wróblewski<sup>a</sup>

<sup>a</sup> *Bioorganic Chemistry Laboratory, Faculty of Pharmacy, Medical University of Łódź, 90-151 Łódź, Muszyńskiego 1, Poland*

<sup>b</sup> *Rega Institute for Medical Research, KU Leuven, Minderbroedersstraat 10, B-3000 Leuven, Belgium*

Corresponding author: Tel: +48 42 677 92 37; fax: +48 42 678 83 98. *E-mail address:* [iwona.glowacka@umed.lodz.pl](mailto:iwona.glowacka@umed.lodz.pl)

Keywords: Aziodophosphonates / Acyclonucleotides / 1,2,3-Triazoles / Synthesis / Antiviral / Cytostatic

|                                                                   |           |
|-------------------------------------------------------------------|-----------|
| 1. General Information                                            | S2        |
| 2. Characterization of intermediates and representative compounds | S2 – S108 |

## 1. General information

$^1\text{H}$  NMR were taken in  $\text{CDCl}_3$ ,  $\text{CD}_3\text{OD}$  or  $\text{D}_2\text{O}$  on the following spectrometers: Varian Mercury-300 and Bruker Avance III (600 MHz) with TMS as an internal standard; chemical shifts  $\delta$  in ppm with respect to TMS; coupling constants  $J$  in Hz.  $^{13}\text{C}$  NMR spectra were recorded for  $\text{CDCl}_3$ ,  $\text{CD}_3\text{OD}$  or  $\text{DMSO}-d_6$  solutions on a Varian Mercury-300 and Bruker Avance III (600 MHz) spectrometer at 75.5 and 150.5 MHz, respectively.  $^{31}\text{P}$  NMR spectra were taken in  $\text{CDCl}_3$ ,  $\text{CD}_3\text{OD}$  or  $\text{D}_2\text{O}$  on Varian Mercury-300 at 121.5 MHz.

IR spectral data were measured on an Infinity MI-60 FT-IR spectrometer. Melting points were determined on a Boetius apparatus and are uncorrected. Elemental analyses were performed by the Microanalytical Laboratory of this Faculty on a Perkin Elmer PE 2400 CHNS analyzer.

The following adsorbents were used: column chromatography, Merck silica gel 60 (70-230 mesh); analytical TLC, Merck TLC plastic sheets silica gel 60  $\text{F}_{254}$ . TLC plates were developed in chloroform–methanol solvent systems. Visualisation of spots was effected with iodine vapours. All solvents were purified by methods described in the literature.

All microwave irradiation experiments were carried out in microwave reactor Plazmartonika RM 800. The reaction carried out in 50 mL glass vial.

## 2. Characterization of intermediates and representative compound

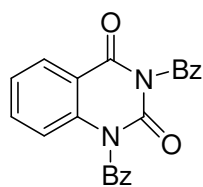

*1,3-Dibenzoylquinazoline-2,4-dione* **28**. White powder; m.p.: 159–160°C; IR (KBr):  $\nu = 3040$  1753, 1723; 1674, 1605, 1472, 974; 866; 753, 688  $\text{cm}^{-1}$ ;  $^1\text{H}$  NMR (300 MHz,  $\text{CDCl}_3$ ):  $\delta = 8.28$  (dd,  $J = 7.9$  Hz,  $J = 1.5$  Hz, 1H, H5); 8.02–7.98 (m, 4H, 4 $\times$ *o*-CH); 7.73–7.63 (m, 3H, 2 $\times$ *p*-CH, H7); 7.56–7.48 (m, 4H, 4 $\times$ *m*-CH); 7.36 (dt,  $J = 7.9$  Hz,  $J = 0.7$  Hz, 1H, H6); 7.10 (d,  $J = 8.4$  Hz, 1H, H8);  $^{13}\text{C}$  NMR (75.5 MHz,  $\text{CDCl}_3$ ):  $\delta = 169.2$ ; 167.8; 160.9; 147.9; 138.6; 136.1; 135.7; 135.3; 131.8; 131.4; 130.6; 130.5; 129.5; 129.3; 129.1; 124.8; 115.2; 114.9; Anal. Calcd. for  $\text{C}_{22}\text{H}_{14}\text{N}_2\text{O}_4$ : C, 71.35; H, 3.81; N, 7.56. Found: C, 71.49; H, 3.76; N, 7.44.

# <sup>1</sup>H NMR

SpinWorks 3: ieg7122H

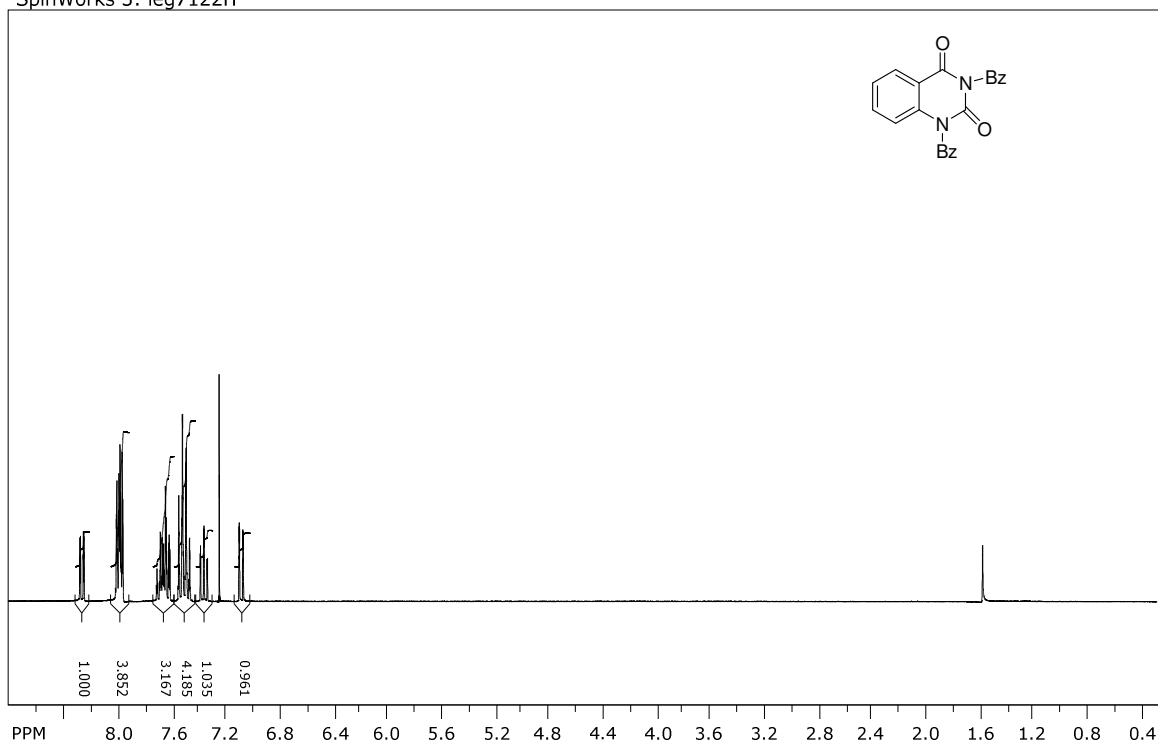

file: ...NMR-widma\NMR\IEG\ieg7122H.fid\fid block# 1 expt: "s2pul"  
transmitter freq.: 300.063051 MHz  
time domain size: 52032 points  
width: 6500.00 Hz = 21.6621 ppm = 0.124923 Hz/pt  
number of scans: 12

freq. of 0 ppm: 300.060201 MHz  
processed size: 65536 complex points  
LB: 0.000 GF: 0.0000  
Hz/cm: 102.757 ppm/cm: 0.34245

<sup>13</sup>C NMR

SpinWorks 3: ieg7122C

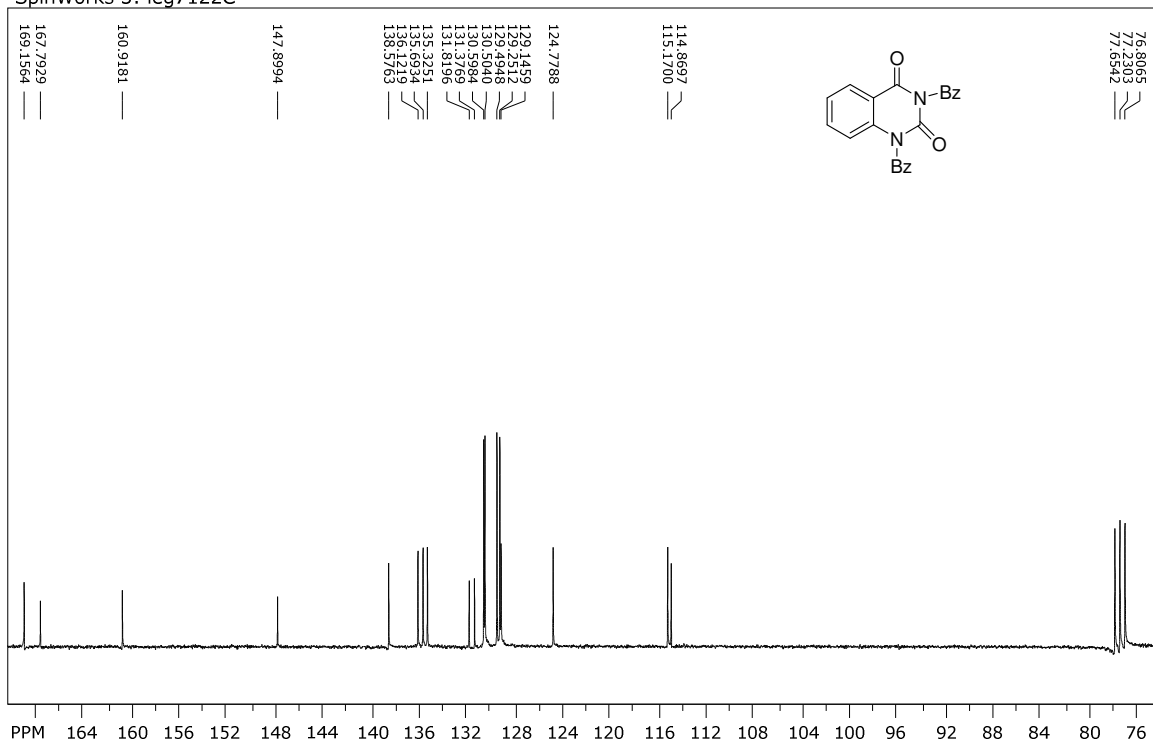

file: ...NMR-widma\NMR\IEG\ieg7122C.fid\fid block# 1 expt: "s2pul"  
transmitter freq.: 75.457729 MHz  
time domain size: 68096 points  
width: 18761.73 Hz = 248.6389 ppm = 0.275519 Hz/pt  
number of scans: 576

freq. of 0 ppm: 75.450195 MHz  
processed size: 131072 complex points  
LB: 1.000 GF: 0.0000  
Hz/cm: 291.618 ppm/cm: 3.86465

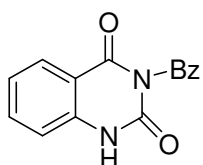

*N*<sup>3</sup>-Benzoylquinazoline-2,4-dione **29**. White needles; m.p.: 209–211°C; IR (KBr):  $\nu = 3436, 3063, 2937, 1753, 1707, 1668, 1400, 760, 687 \text{ cm}^{-1}$ ; <sup>1</sup>H NMR (300 MHz, CDCl<sub>3</sub>):  $\delta = 9.34$  (brs, 1H, NH); 8.13 (dd,  $J = 7.9 \text{ Hz}, J = 1.5 \text{ Hz}, 1\text{H}$ ); 8.03–7.99 (m, 2H, 2 $\times$ *o*-CH); 7.71–7.62 (m, 2H); 7.55–7.49 (m, 2H); 7.29 (dd,  $J = 7.9 \text{ Hz}, J = 0.9 \text{ Hz}, 1\text{H}$ ); 7.31 (ddd,  $J = 8.2 \text{ Hz}, J = 0.9 \text{ Hz}, J = 0.5 \text{ Hz}, 1\text{H}$ ); <sup>13</sup>C NMR (151 MHz, DMSO-*d*<sub>6</sub>):  $\delta = 170.3; 162.3; 149.3; 140.9; 136.4; 135.9; 132.0; 130.9; 129.9; 127.7; 123.6; 116.4; 114.3$ ; Anal. Calcd. for C<sub>15</sub>H<sub>10</sub>N<sub>2</sub>O<sub>3</sub>: C, 67.67; H, 3.79; N, 10.52. Found: C, 67.48; H, 3.91; N, 10.45.

### <sup>1</sup>H NMR

SpinWorks 3: ieg7124H

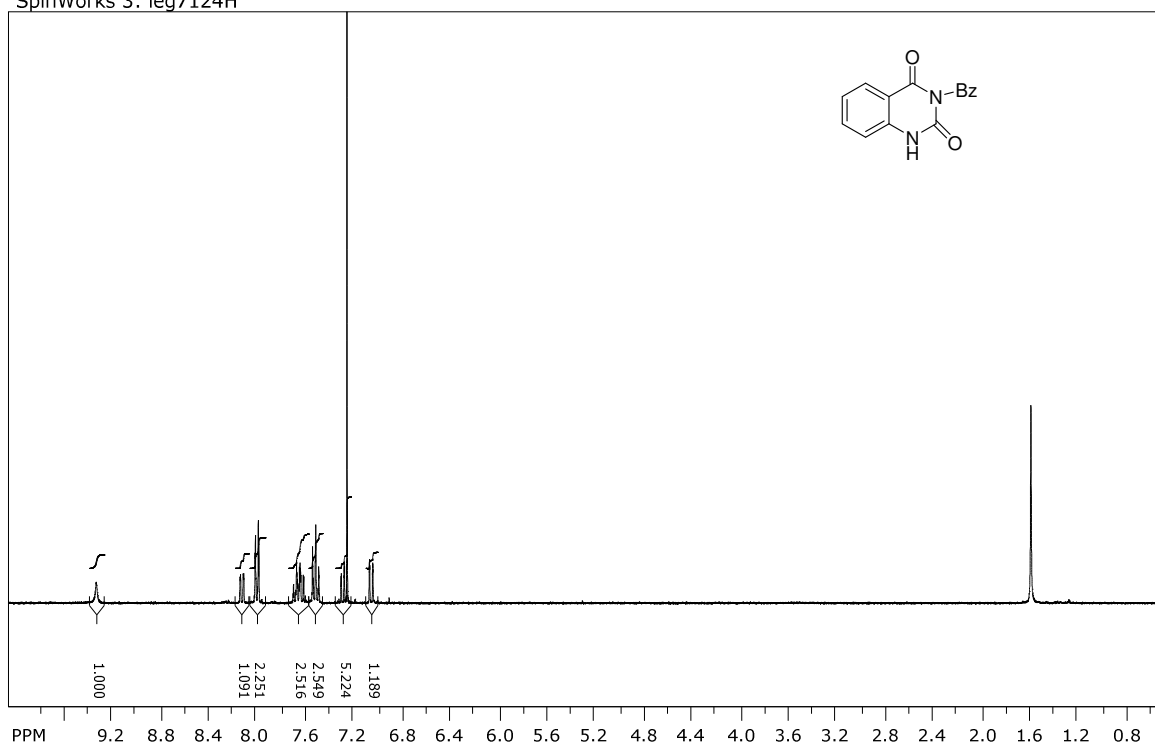

file: ...NMR-widma\NMR\IEG\ieg7124H.fid block# 1 expt: "s2pul"  
 transmitter freq.: 300.063051 MHz  
 time domain size: 52032 points  
 width: 6500.00 Hz = 21.6621 ppm = 0.124923 Hz/pt  
 number of scans: 16

freq. of 0 ppm: 300.060201 MHz  
 processed size: 65536 complex points  
 LB: 0.000 GF: 0.0000  
 Hz/cm: 115.394 ppm/cm: 0.38457

# <sup>13</sup>C NMR

SpinWorks 3: no title

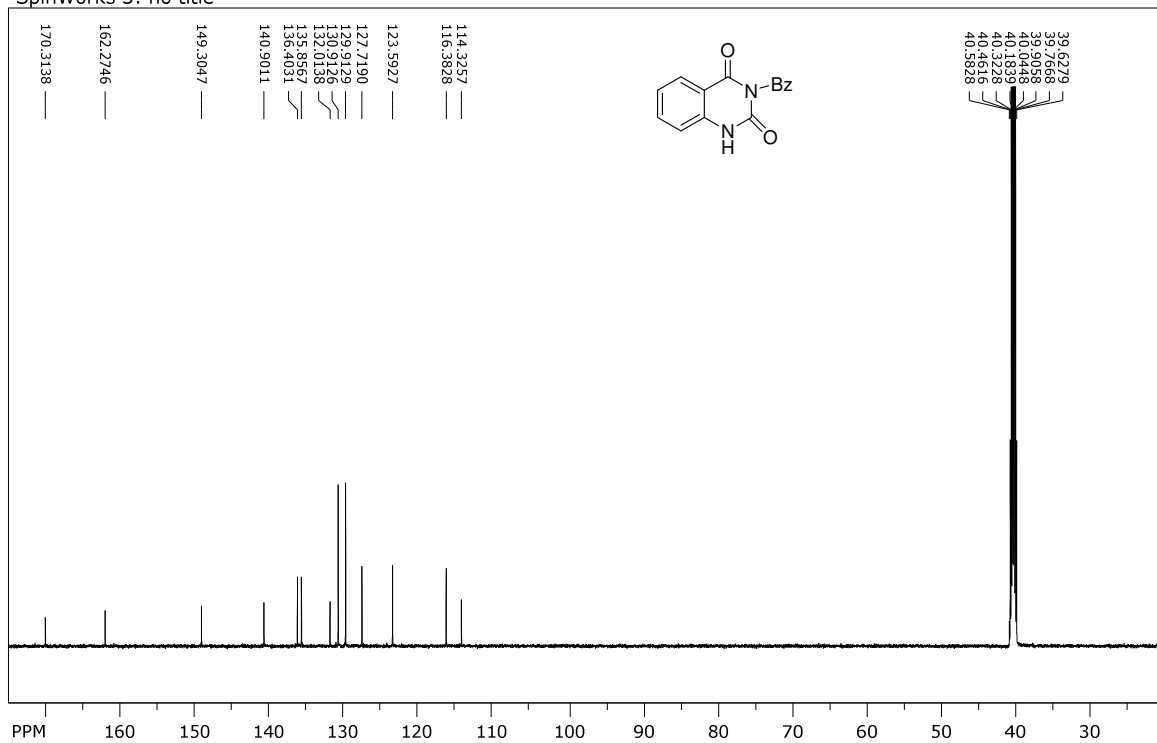

file: ...\\NMR-widma\\NMR\\IEG\\ieg-7124\\10\\fid exp: <zpgg30>  
transmitter freq.: 150.950591 MHz  
time domain size: 65536 points  
width: 36057.69 Hz = 238.8708 ppm = 0.550197 Hz/pt  
number of scans: 3000

freq. of 0 ppm: 150.935497 MHz  
processed size: 32768 complex points  
LB: 1.000 GF: 0.0000  
Hz/cm: 938.937 ppm/cm: 6.22016

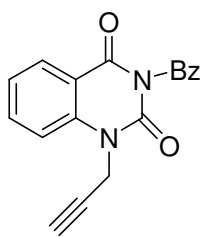

*N*<sup>3</sup>-Benzoyl-*N*<sup>1</sup>-propargylquinazoline-2,4-dione **19e**. White powder; m.p.: 180–182°C; IR (KBr):  $\nu = 3256, 3002, 2925, 1751, 1697, 1659, 1482, 756, 684 \text{ cm}^{-1}$ ; <sup>1</sup>H NMR (600 MHz, CDCl<sub>3</sub>):  $\delta = 8.26$  (dd,  $J = 7.9 \text{ Hz}, J = 1.3 \text{ Hz}$ , 1H, H5); 8.12–7.99 (m, 2H, 2 $\times$ *o*-CH); 7.83 (dt,  $J = 7.3 \text{ Hz}, J = 1.4 \text{ Hz}$ , 1H, H7); 7.69–7.67 (m, 1H, *p*-CH); 7.54–7.50 (m, 3H, 2 $\times$ *m*-CH, H8); 7.31 (brt,  $J = 7.6 \text{ Hz}$ , 1H); 4.96 (d,  $J = 2.5 \text{ Hz}$ , 2H, CH $\equiv$ CCH<sub>2</sub>); 3.74 (t,  $J = 2.5 \text{ Hz}$ , 1H, CH $\equiv$ CCH<sub>2</sub>); <sup>13</sup>C NMR (151 MHz, CDCl<sub>3</sub>):  $\delta = 168.4$  (s, C=O); 160.9 (s, C=O); 148.8 (s, C=O); 139.6; 136.1; 135.1; 131.7; 130.5; 129.2; 129.2; 123.9; 115.8; 114.7; 73.8; 32.8; Anal. Calcd. for C<sub>18</sub>H<sub>12</sub>N<sub>2</sub>O<sub>3</sub>: C, 71.05; H, 3.97; N, 9.21. Found: C, 70.92; H, 4.05; N, 9.14.

### <sup>1</sup>H NMR

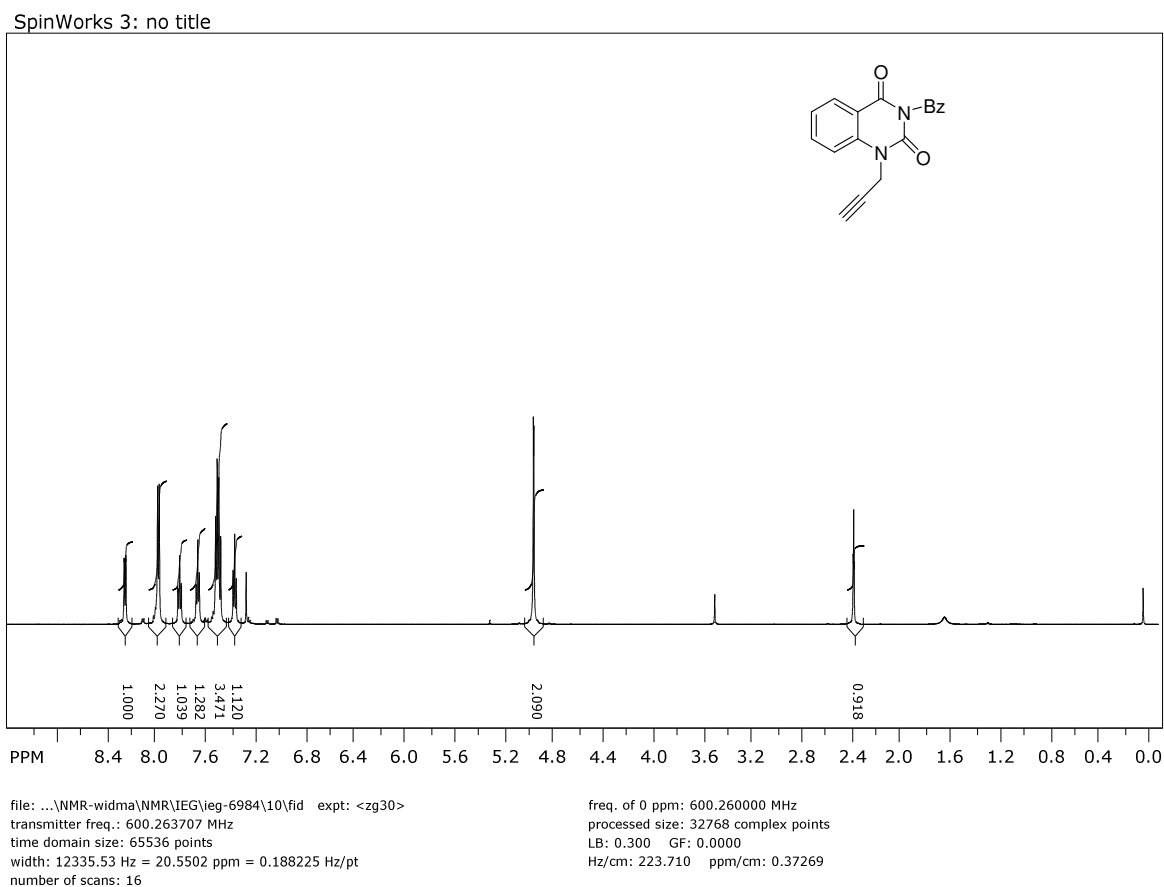

# <sup>13</sup>C NMR

SpinWorks 3: no title

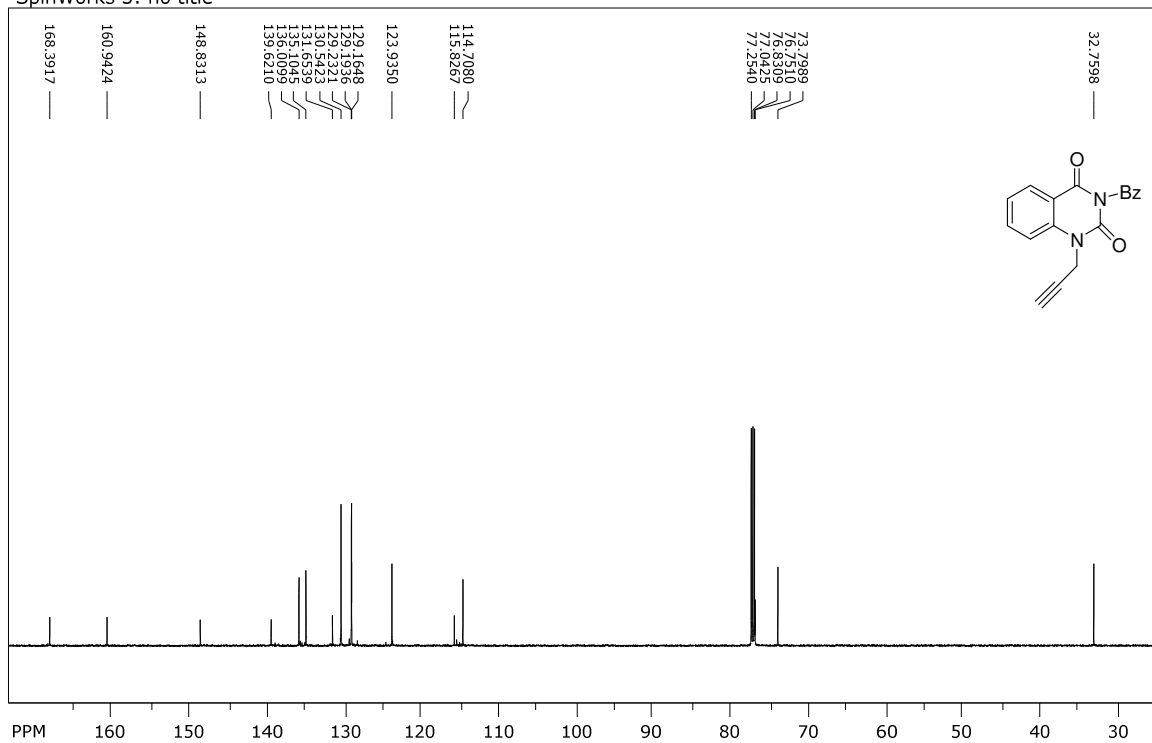

file: ...\\NMR-widma\\NMR\\IEG\\ieg-6984\\11\\fid exp: <zpgg30>  
transmitter freq.: 150.950591 MHz  
time domain size: 65536 points  
width: 36057.69 Hz = 238.8708 ppm = 0.550197 Hz/pt  
number of scans: 1024

freq. of 0 ppm: 150.935497 MHz  
processed size: 32768 complex points  
LB: 1.000 GF: 0.0000  
Hz/cm: 903.310 ppm/cm: 5.98414



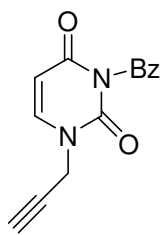

*N*<sup>3</sup>-Benzoyl-*N*<sup>1</sup>-propargyluracil **19m**. White solid, m.p.: 139–140°C; <sup>1</sup>H NMR (300 MHz, CDCl<sub>3</sub>): 7.95–7.92 (m, 2H, 2×*o*-CH); 7.69–7.63 (m, 1H, *p*-CH); 7.58 (d, *J* = 8.1 Hz, 1H, HC=CH); 7.55–7.48 (m, 2H, *m*-CH); 5.89 (d, *J* = 8.1 Hz, 1H, HC=CH); 4.59 (d, *J* = 2.6 Hz, 2H, CH≡CCH<sub>2</sub>); 2.55 (t, *J* = 2.6 Hz, 1H, CH≡CCH<sub>2</sub>).

## <sup>1</sup>H NMR

SpinWorks 3: ieg7000H

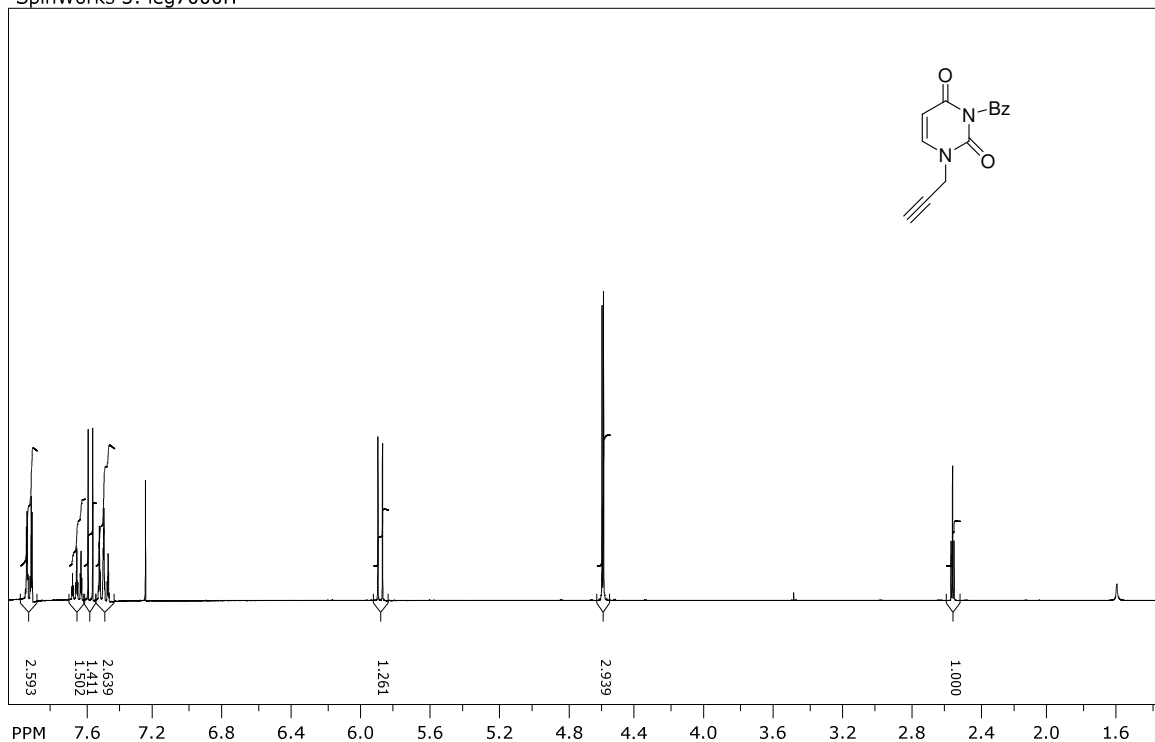

file: ...NMR-widma\NMR\IEG\ieg7000H.fid\fid block# 1 expt: "s2pul"  
 transmitter freq.: 300.063051 MHz  
 time domain size: 52032 points  
 width: 6500.00 Hz = 21.6621 ppm = 0.124923 Hz/pt  
 number of scans: 16

freq. of 0 ppm: 300.060201 MHz  
 processed size: 65536 complex points  
 LB: 0.000 GF: 0.0000  
 Hz/cm: 80.848 ppm/cm: 0.26944

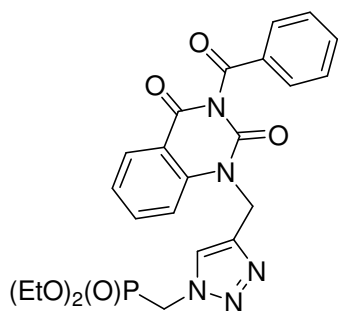

*Diethyl {4-[(3-benzoyl-2,4-dioxoquinazolin-1-yl)methyl]-1H-1,2,3-triazol-1-yl}methylphosphonate* **20e**. Colourless oil; IR (film):  $\nu = 3030, 2982, 1750, 1700, 1662, 1021, 757, 671 \text{ cm}^{-1}$ ;  $^1\text{H}$  NMR (600 MHz,  $\text{CDCl}_3$ ):  $\delta = 8.20$  (dd,  $J = 7.9 \text{ Hz}, J = 1.6 \text{ Hz}$ , 1H, H5); 7.99–7.95 (m, 2H,  $2\times o\text{-CH}$ ); 7.88 (brd,  $J = 8.5 \text{ Hz}$ , 1H, H8); 7.86 (s, 1H,  $\text{HC}5'$ ); 7.76 (ddd,  $J = 8.5 \text{ Hz}, J = 7.9 \text{ Hz}, J = 1.6 \text{ Hz}$ , 1H, H7); 7.68–7.64 (m, 1H,  $p\text{-CH}$ ); 7.52–7.49 (m, 2H,  $2\times m\text{-CH}$ ); 7.31 (dt,  $J = 7.9 \text{ Hz}, J = 0.6 \text{ Hz}$ , 1H, H6); 5.42 (s, 2H,  $\text{CH}_2$ ); 4.73 (d,  $J = 13.1 \text{ Hz}$ , 2H,  $\text{PCH}_2$ ); 4.17–4.06 (m, 4H,  $2\times \text{POCH}_2\text{CH}_3$ ); 1.25 (t,  $J = 7.2 \text{ Hz}$ , 3H,  $\text{POCH}_2\text{CH}_3$ ); 1.24 (t,  $J = 7.2 \text{ Hz}$ , 3H,  $\text{POCH}_2\text{CH}_3$ );  $^{13}\text{C}$  NMR (75.5 MHz,  $\text{CDCl}_3$ ):  $\delta = 168.6$  (s,  $\text{C}=\text{O}$ ); 161.1 (s,  $\text{C}=\text{O}$ ); 149.5 (s,  $\text{C}=\text{O}$ ); 142.8 (s,  $\text{HC}=\text{C}$ ); 140.2; 136.2; 135.2; 131.6; 130.6; 129.4; 129.0; 124.8 (s,  $\text{HC}=\text{C}$ ); 123.9; 115.6; 115.3; 63.7 (d,  $J = 6.5 \text{ Hz}$ ,  $\text{POC}$ ); 46.1 (d,  $J = 154.9 \text{ Hz}$ ,  $\text{PC}$ ); 38.9; 16.5 (d,  $J = 5.7 \text{ Hz}$ ,  $\text{POCC}$ );  $^{31}\text{P}$  NMR (121.5 MHz,  $\text{CDCl}_3$ ):  $\delta = 16.49$  ppm. Anal. Calcd. for  $\text{C}_{23}\text{H}_{24}\text{N}_5\text{O}_6\text{P}$ : C, 55.53; H, 4.86; N, 14.08. Found: C, 55.24; H, 4.73; N, 13.86.

## $^1\text{H}$ NMR

SpinWorks 3: no title

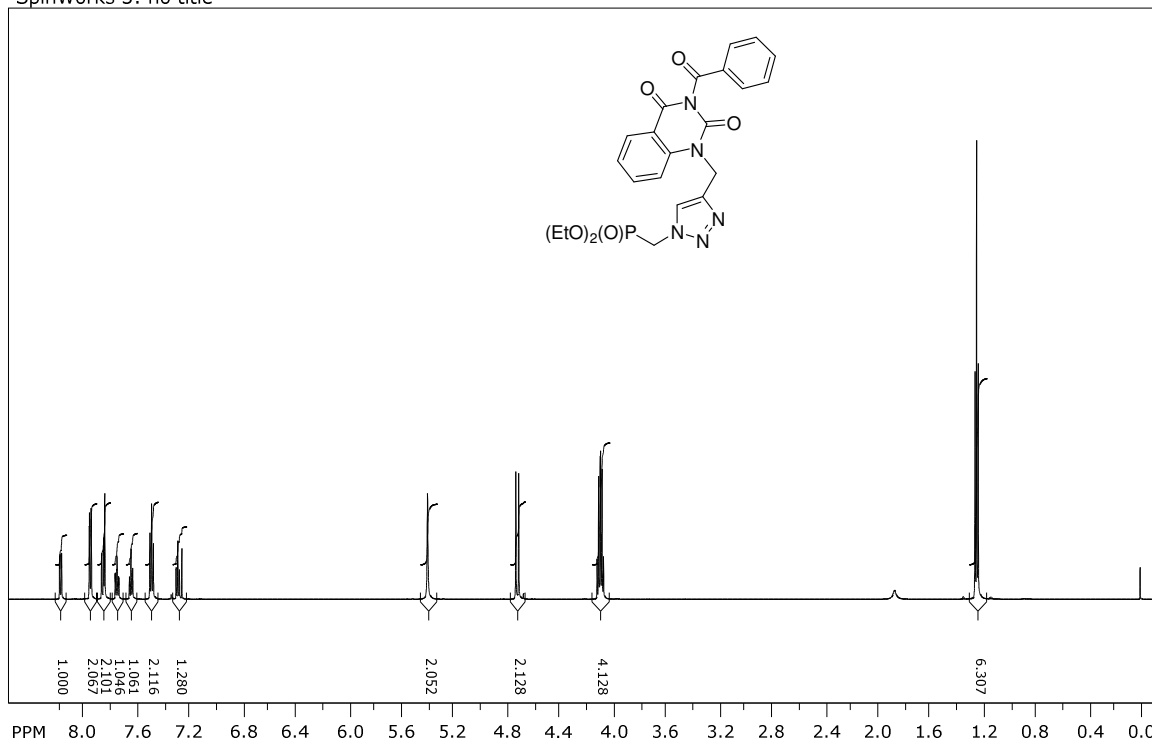

file: ...NMR-widma\NMR\IEG\ieg-6901\10\fid exp: <zg30>  
 transmitter freq.: 600.263707 MHz  
 time domain size: 65536 points  
 width: 12335.53 Hz = 20.5502 ppm = 0.188225 Hz/pt  
 number of scans: 16

freq. of 0 ppm: 600.260009 MHz  
 processed size: 32768 complex points  
 LB: 0.300 GF: 0.0000  
 Hz/cm: 209.950 ppm/cm: 0.34976

# <sup>13</sup>C NMR

SpinWorks 3: ieg6885C

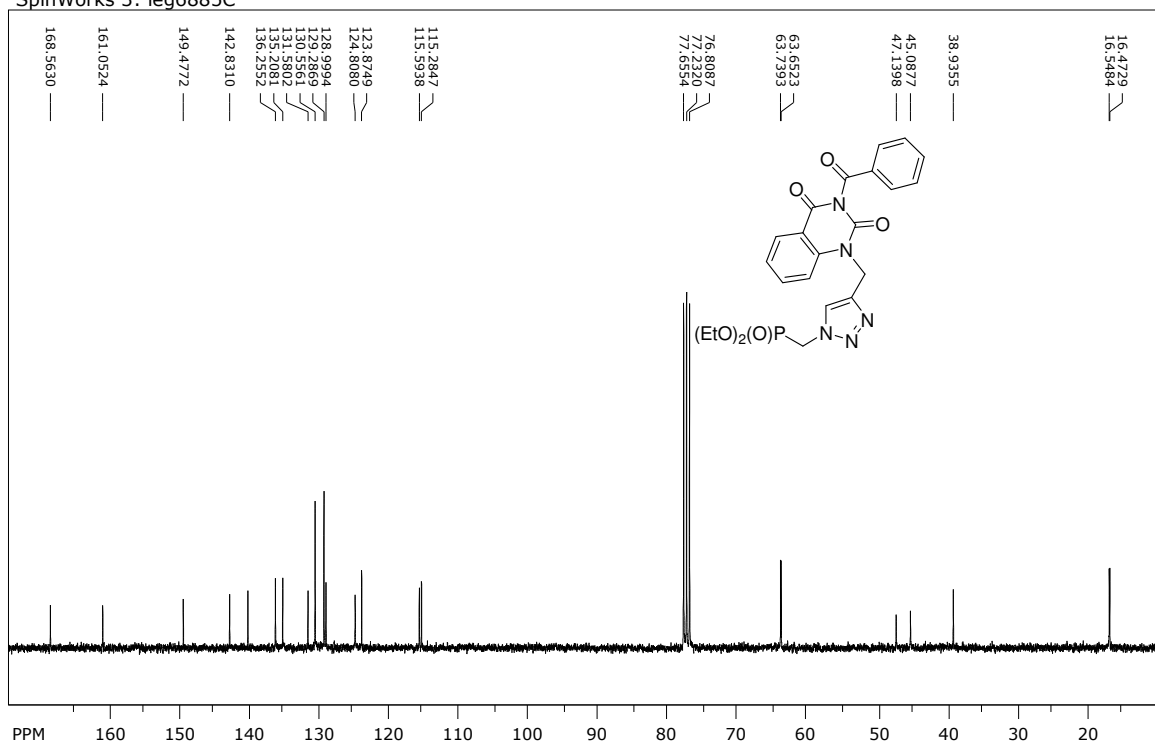

file: ...NMR-widma\NMR\IEG\ieg6885C.fid\fid block# 1 expt: "s2pul"  
transmitter freq.: 75.457729 MHz  
time domain size: 68096 points  
width: 18761.73 Hz = 248.6389 ppm = 0.275519 Hz/pt  
number of scans: 816

freq. of 0 ppm: 75.450185 MHz  
processed size: 131072 complex points  
LB: 1.000 GF: 0.0000  
Hz/cm: 499.914 ppm/cm: 6.62509

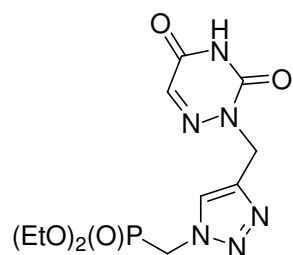

*Diethyl 4-[(3,5-dioxo-1,2,4-triazin-2-yl)methyl]-1H-1,2,3-triazol-1-yl)methylphosphonate* **20f**. White solid; m.p.: 139–140°C; IR (KBr):  $\nu = 3344, 2988, 1697, 1668, 1235, 1025 \text{ cm}^{-1}$ ;  $^1\text{H}$  NMR (300 MHz,  $\text{CDCl}_3$ ):  $\delta = 10.6$  (s, 1H, NH); 7.94 (s, 1H); 7.40 (s, 1H); 5.22 (s, 2H,  $\text{CH}_2$ ); 4.76 (d,  $J = 13.3 \text{ Hz}$ , 2H,  $\text{PCH}_2$ ); 4.18–4.07 (m, 4H,  $2 \times \text{POCH}_2\text{CH}_3$ ); 1.30 (t,  $J = 6.9 \text{ Hz}$ , 3H,  $\text{POCH}_2\text{CH}_3$ ); 1.29 (t,  $J = 6.9 \text{ Hz}$ , 3H,  $\text{POCH}_2\text{CH}_3$ );  $^{13}\text{C}$  NMR (75.5 MHz,  $\text{CDCl}_3$ ):  $\delta = 155.9$  (s,  $\text{C}=\text{O}$ ); 149.1 ( $\text{C}=\text{O}$ ); 142.2 (s,  $\text{HC}=\text{C}$ ); 134.8 (s,  $\text{HC}=\text{N}$ ); 125.1 (s,  $\text{HC}=\text{C}$ ); 63.9 (d,  $J = 6.6 \text{ Hz}$ , POC); 46.0 (d,  $J = 155.5 \text{ Hz}$ , PC); 34.7; 16.5 (d,  $J = 5.8 \text{ Hz}$ , POCC);  $^{31}\text{P}$  NMR (121.5 MHz,  $\text{CDCl}_3$ ):  $\delta = 16.83 \text{ ppm}$ . Anal. Calcd. for  $\text{C}_{11}\text{H}_{17}\text{N}_6\text{O}_5\text{P}$ : C, 38.38; H, 4.98; N, 24.41. Found: C, 38.15; H, 5.08; N, 24.53.

## $^1\text{H}$ NMR

SpinWorks 3: ieg6761H

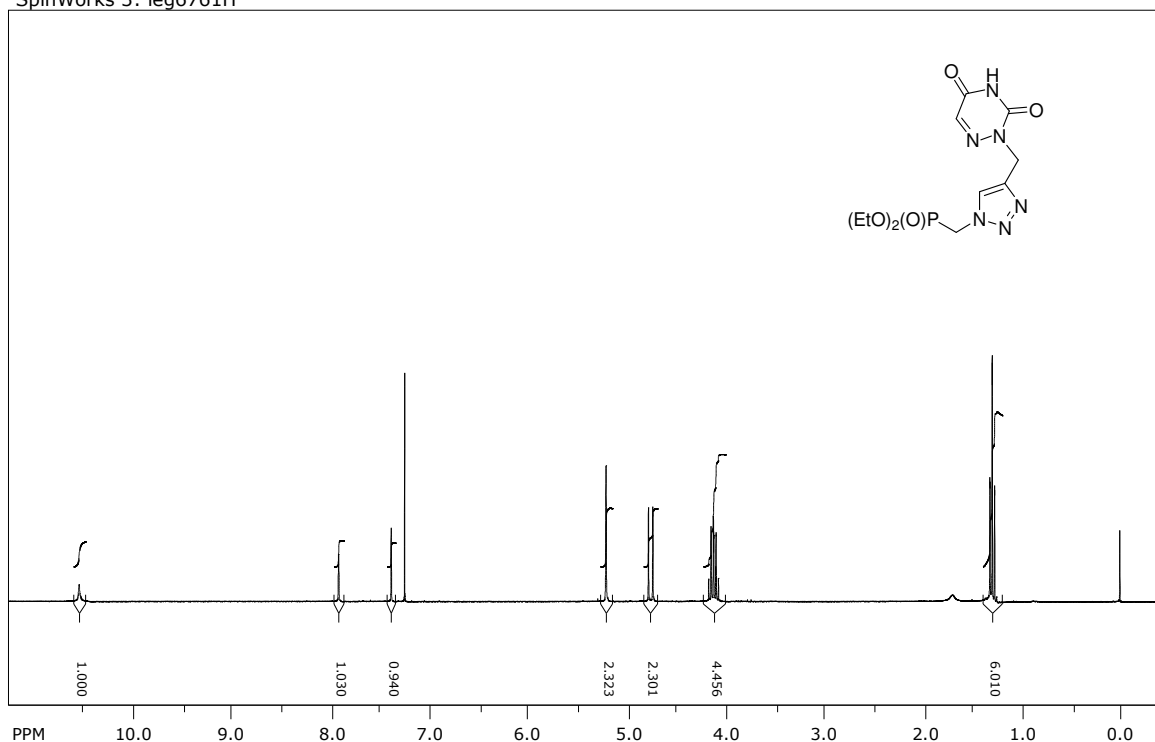

file: ...NMR-widma\NMR\IEG\ieg6761H.fid\fid block# 1 expt: "s2pul"  
 transmitter freq.: 300.063051 MHz  
 time domain size: 52032 points  
 width: 6500.00 Hz = 21.6621 ppm = 0.124923 Hz/pt  
 number of scans: 16

freq. of 0 ppm: 300.060200 MHz  
 processed size: 65536 complex points  
 LB: 0.000 GF: 0.0000  
 Hz/cm: 140.669 ppm/cm: 0.46880

# <sup>13</sup>C NMR

SpinWorks 3: ieg6756C

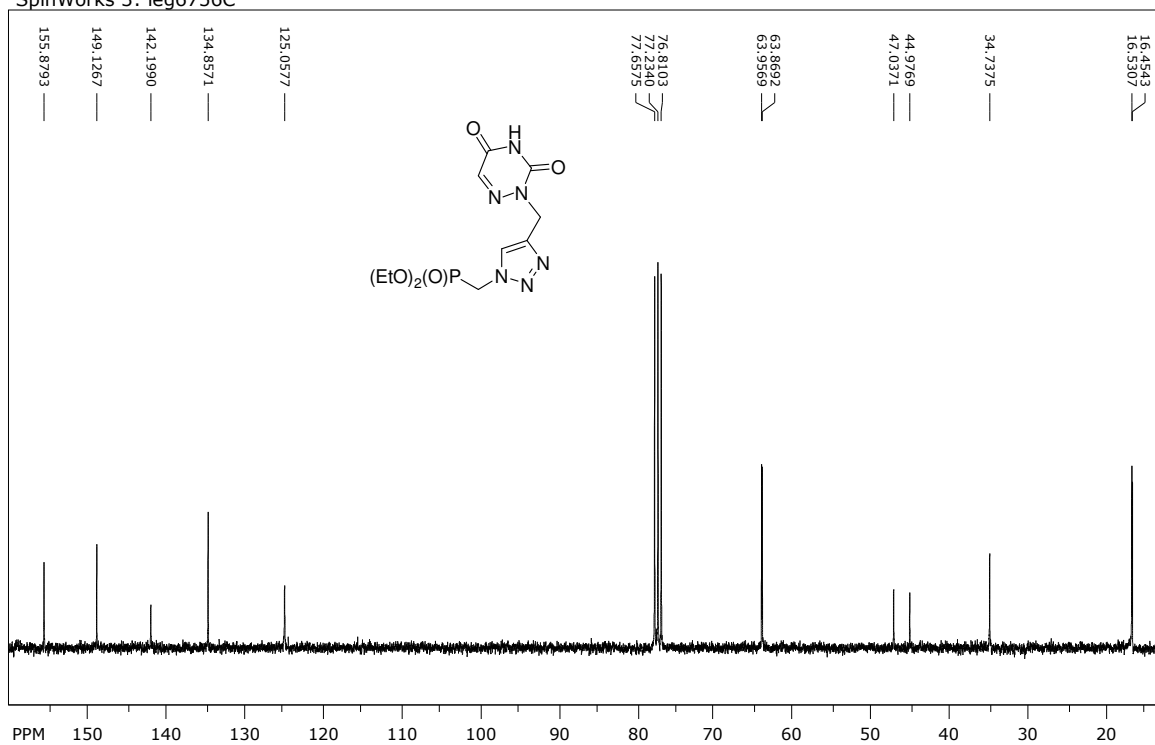

file: ...NMR-widma\NMR\IEG\ieg6756C.fid\fid block# 1 expt: "s2pul"  
transmitter freq.: 75.457729 MHz  
time domain size: 68096 points  
width: 18761.73 Hz = 248.6389 ppm = 0.275519 Hz/pt  
number of scans: 448

freq. of 0 ppm: 75.450191 MHz  
processed size: 131072 complex points  
LB: 1.000 GF: 0.0000  
Hz/cm: 446.096 ppm/cm: 5.91186

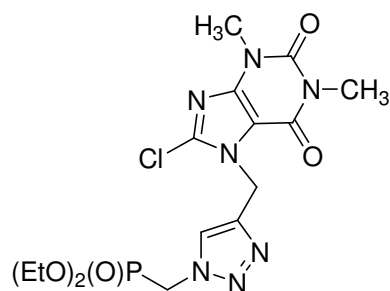

*Diethyl* {4-[(8-chloro-1,3-dimethyl-2,6-dioxopurin-7-yl)methyl]-1H-1,2,3-triazol-1-yl}methylphosphonate **20g**.

White solid; m.p.: 156–157°C; IR (KBr):  $\nu = 2996, 2955, 1707, 1667, 1251, 1025, 757 \text{ cm}^{-1}$ ;  $^1\text{H}$  NMR (300 MHz,  $\text{CDCl}_3$ ):  $\delta = 7.98$  (s, 1H,  $\text{HC5}'$ ); 5.65 (s, 2H,  $\text{CH}_2$ ); 4.74 (d,  $J = 13.1 \text{ Hz}$ , 2H,  $\text{PCH}_2$ ); 4.18–4.07 (m, 4H,  $2 \times \text{POCH}_2\text{CH}_3$ );

3.54 (s, 3H,  $\text{CH}_3$ ); 3.40 (s, 3H,  $\text{CH}_3$ ); 1.30 (t,  $J = 7.2 \text{ Hz}$ , 3H,  $\text{POCH}_2\text{CH}_3$ ); 1.28 (t,  $J = 7.2 \text{ Hz}$ , 3H,  $\text{POCH}_2\text{CH}_3$ );  $^{13}\text{C}$  NMR (75.5 MHz,  $\text{CDCl}_3$ ):  $\delta = 154.3$  (s,  $\text{C}=\text{O}$ ); 151.1 (s,  $\text{C}=\text{O}$ ); 147.3; 142.0; 138.9; 124.5; 107.5; 63.7 (d,  $J = 6.5 \text{ Hz}$ ,  $\text{POC}$ ); 46.0 (d,  $J = 154.9 \text{ Hz}$ ,  $\text{PC}$ ); 41.0; 30.0; 28.1; 16.4 (d,  $J = 5.7 \text{ Hz}$ ,  $\text{POCC}$ );  $^{31}\text{P}$  NMR (121.5 MHz,  $\text{CDCl}_3$ ):  $\delta = 16.48 \text{ ppm}$ . Anal. Calcd. for  $\text{C}_{15}\text{H}_{21}\text{ClN}_7\text{O}_5\text{P}$ : C, 40.41; H, 4.75; N, 21.99. Found: C, 40.58; H, 4.55; N, 22.07.

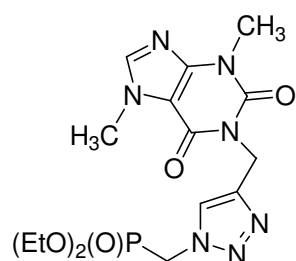

*Diethyl* {4-[(3,7-dimethyl-2,6-dioxopurin-1-yl)methyl]-1H-1,2,3-triazol-1-yl}methylphosphonate **20h**. White solid; m.p.: 139–140°C;

IR (KBr):  $\nu = 2984, 2944, 2830, 1706, 1663, 1237, 1028 \text{ cm}^{-1}$ ;  $^1\text{H}$  NMR (300 MHz,  $\text{CDCl}_3$ ):  $\delta = 7.83$  (s, 1H); 7.52 (s, 1H); 5.33 (s, 2H,  $\text{CH}_2$ ); 4.73 (d,  $J = 13.1 \text{ Hz}$ , 2H,  $\text{PCH}_2$ ); 4.17–4.06 (m, 4H,  $2 \times \text{POCH}_2\text{CH}_3$ ); 3.99 (s, 3H,  $\text{CH}_3$ ); 3.56 (s, 3H,  $\text{CH}_3$ ); 1.29 (t,  $J = 7.0 \text{ Hz}$ , 3H,  $\text{POCH}_2\text{CH}_3$ );

1.28 (t,  $J = 7.0 \text{ Hz}$ , 3H,  $\text{POCH}_2\text{CH}_3$ );  $^{13}\text{C}$  NMR (75.5 MHz,  $\text{CDCl}_3$ ):  $\delta = 154.7$  (s,  $\text{C}=\text{O}$ ); 151.2 (s,  $\text{C}=\text{O}$ ); 148.9; 144.0; 141.7; 124.3; 107.7; 63.6 (d,  $J = 6.6 \text{ Hz}$ ,  $\text{POC}$ ); 45.9 (d,  $J = 154.9 \text{ Hz}$ ,  $\text{PC}$ ); 36.1; 33.8; 29.9; 16.5 (d,  $J = 5.7 \text{ Hz}$ ,  $\text{POCC}$ );  $^{31}\text{P}$  NMR (121.5 MHz,  $\text{CDCl}_3$ ):  $\delta = 16.84 \text{ ppm}$ . Anal. Calcd. for  $\text{C}_{15}\text{H}_{22}\text{N}_7\text{O}_5\text{P}$ : C, 43.80; H, 5.39; N, 23.84. Found: C, 44.02; H, 5.54; N, 23.99.

# $^1\text{H}$ NMR

SpinWorks 3: ieg6722h

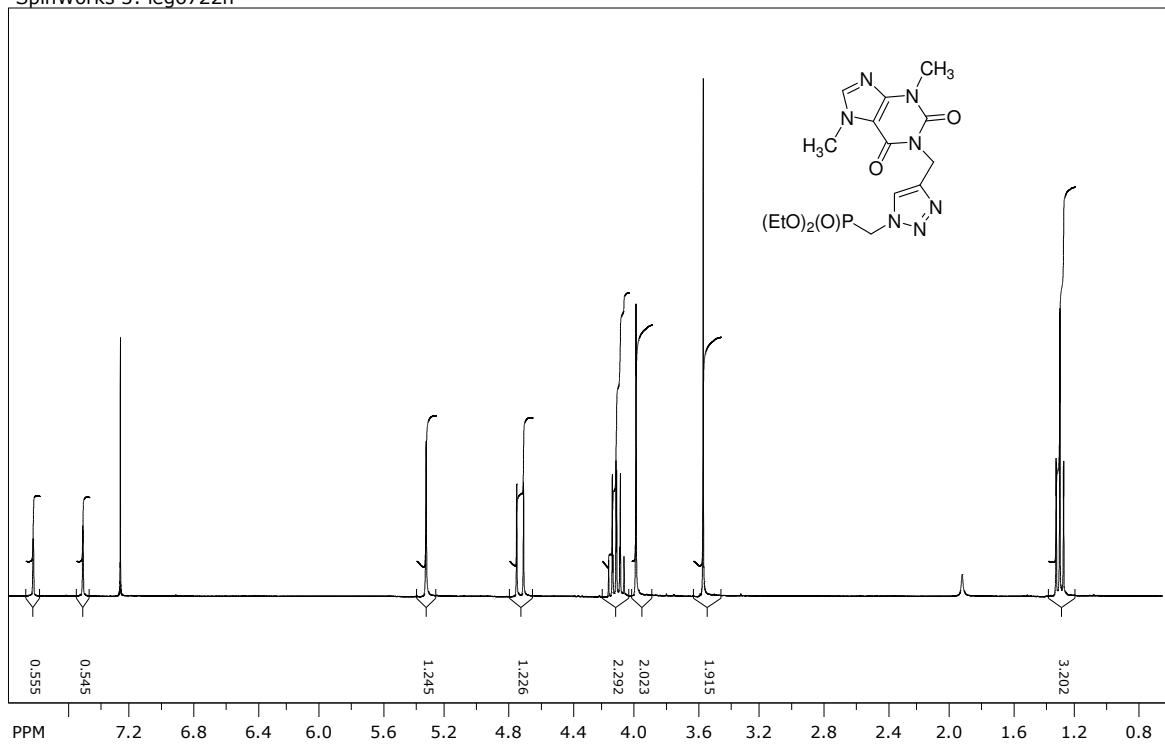

file: ...NMR-widma\NMR\IEG\ieg6722h.fid\fid block# 1 expt: "s2pul"  
transmitter freq.: 300.063051 MHz  
time domain size: 52032 points  
width: 6500.00 Hz = 21.6621 ppm = 0.124923 Hz/pt  
number of scans: 16

freq. of 0 ppm: 300.060196 MHz  
processed size: 65536 complex points  
LB: 0.000 GF: 0.0000  
Hz/cm: 88.262 ppm/cm: 0.29414

# <sup>13</sup>C NMR

SpinWorks 3: ieg6722C

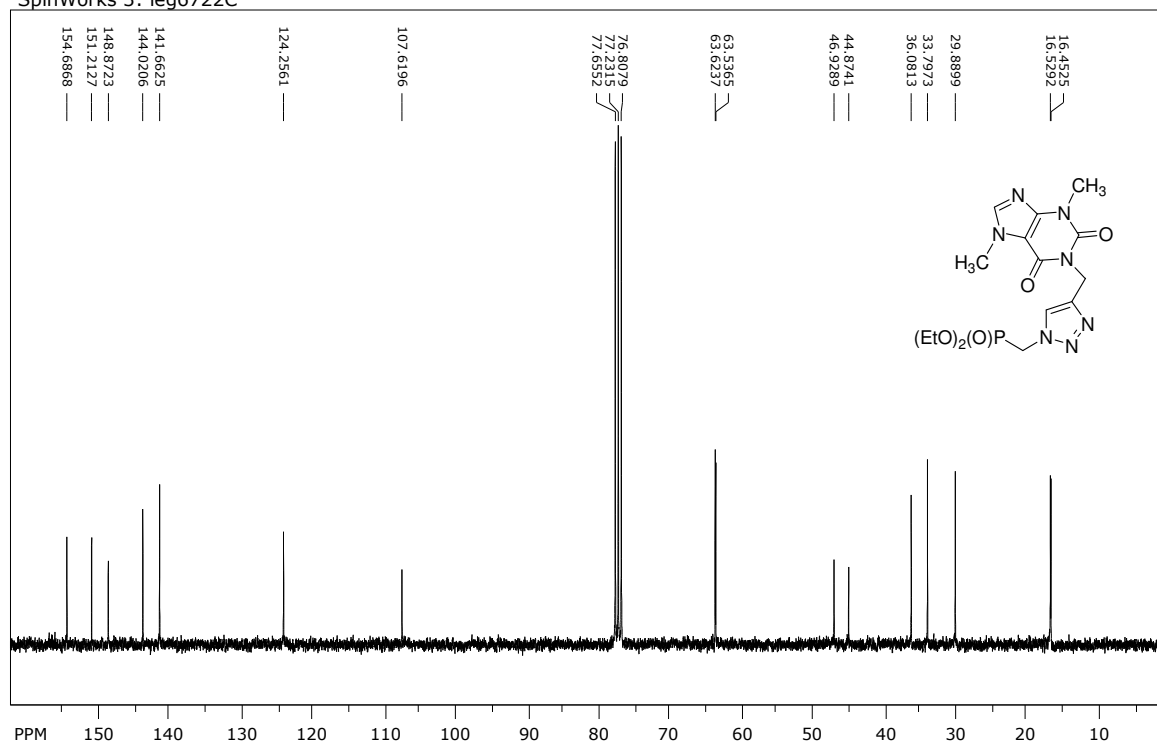

file: ...NMR-widma\NMR\IEG\ieg6722c.fid\fid\_block# 1 expt: "s2pul"  
transmitter freq.: 75.457729 MHz  
time domain size: 68096 points  
width: 18761.73 Hz = 248.6389 ppm = 0.275519 Hz/pt  
number of scans: 688

freq. of 0 ppm: 75.450191 MHz  
processed size: 131072 complex points  
LB: 1.000 GF: 0.0000  
Hz/cm: 489.150 ppm/cm: 6.48244



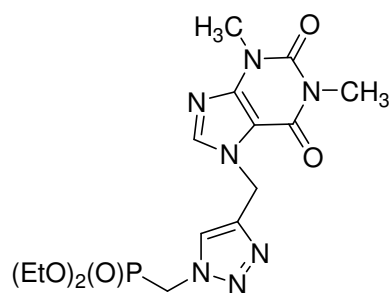

Diethyl 4-[(1,3-dimethyl-2,6-dioxopurin-7-yl)methyl]-1H-1,2,3-triazol-1-yl)methylphosphonate **20i**. White solid; m.p.: 105–108°C; IR (KBr):  $\nu = 2994, 2945, 1705, 1660, 1244, 1026 \text{ cm}^{-1}$ ;  $^1\text{H NMR}$  (300 MHz,  $\text{CDCl}_3$ ):  $\delta = 8.02$  (s, 1H); 7.80 (s, 1H); 5.60 (s, 2H,  $\text{CH}_2$ ); 4.74 (d,  $J = 13.1 \text{ Hz}$ , 2H,  $\text{POCH}_2$ ); 4.18–4.08 (m, 4H,  $2 \times \text{POCH}_2\text{CH}_3$ ); 3.57 (s, 3H,  $\text{CH}_3$ );

3.40 (s, 3H,  $\text{CH}_3$ ); 1.29 (t,  $J = 6.9 \text{ Hz}$ , 3H,  $\text{POCH}_2\text{CH}_3$ ); 1.28 (t,  $J = 6.9 \text{ Hz}$ , 3H,  $\text{POCH}_2\text{CH}_3$ );  $^{13}\text{C NMR}$  (75.5 MHz,  $\text{CDCl}_3$ ):  $\delta = 155.3$  (s,  $\text{C}=\text{O}$ ); 151.6 (s,  $\text{C}=\text{O}$ ); 149.0; 142.6; 141.3; 124.7; 106.5; 63.7 (d,  $J = 6.6 \text{ Hz}$ ,  $\text{POC}$ ); 46.2 (d,  $J = 154.9 \text{ Hz}$ ,  $\text{PC}$ ); 41.7; 30.0; 28.2; 16.5 (d,  $J = 5.7 \text{ Hz}$ ,  $\text{POCC}$ );  $^{31}\text{P NMR}$  (121.5 MHz,  $\text{CDCl}_3$ ):  $\delta = 16.50 \text{ ppm}$ . Anal. Calcd. for  $\text{C}_{15}\text{H}_{22}\text{N}_7\text{O}_5\text{P}$ : C, 43.80; H, 5.39; N, 23.84. Found: C, 43.78; H, 5.45; N, 24.00.

## $^1\text{H NMR}$

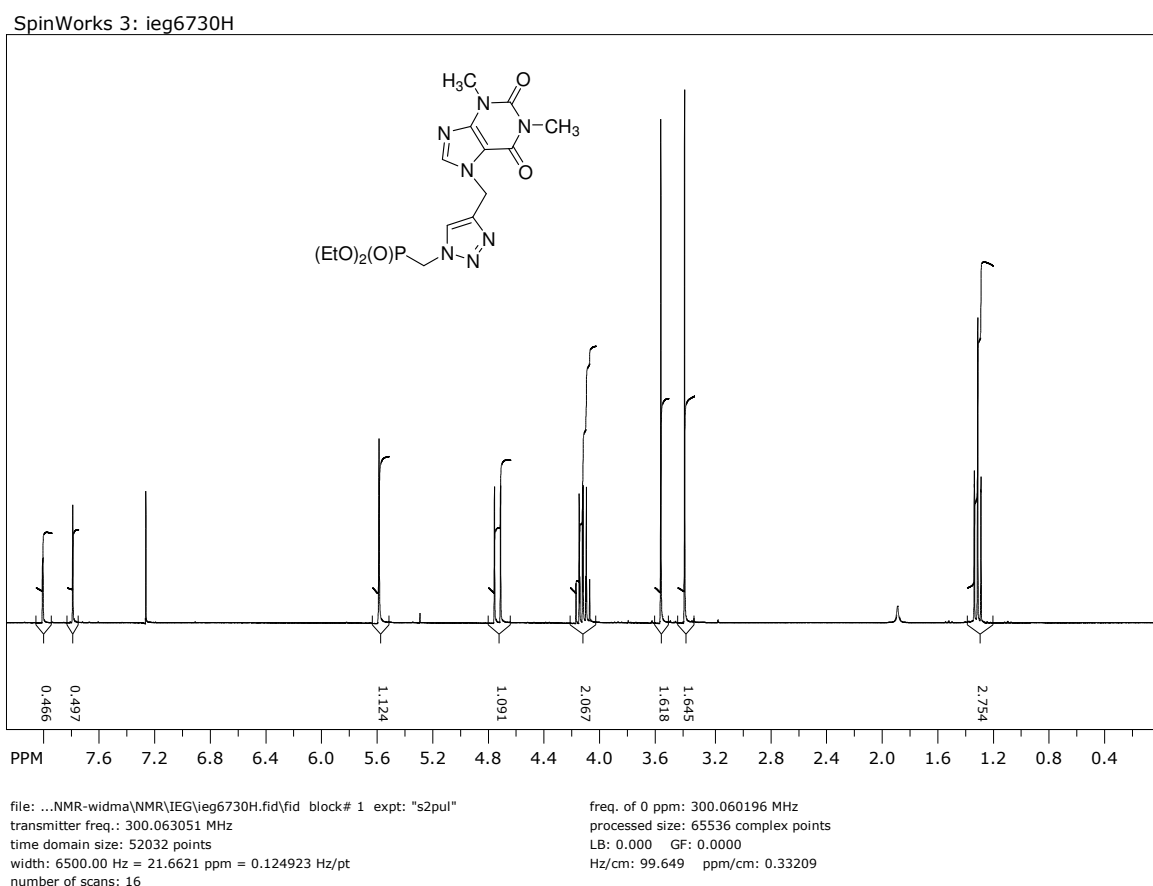

<sup>13</sup>C NMR

SpinWorks 3: ieg6730C

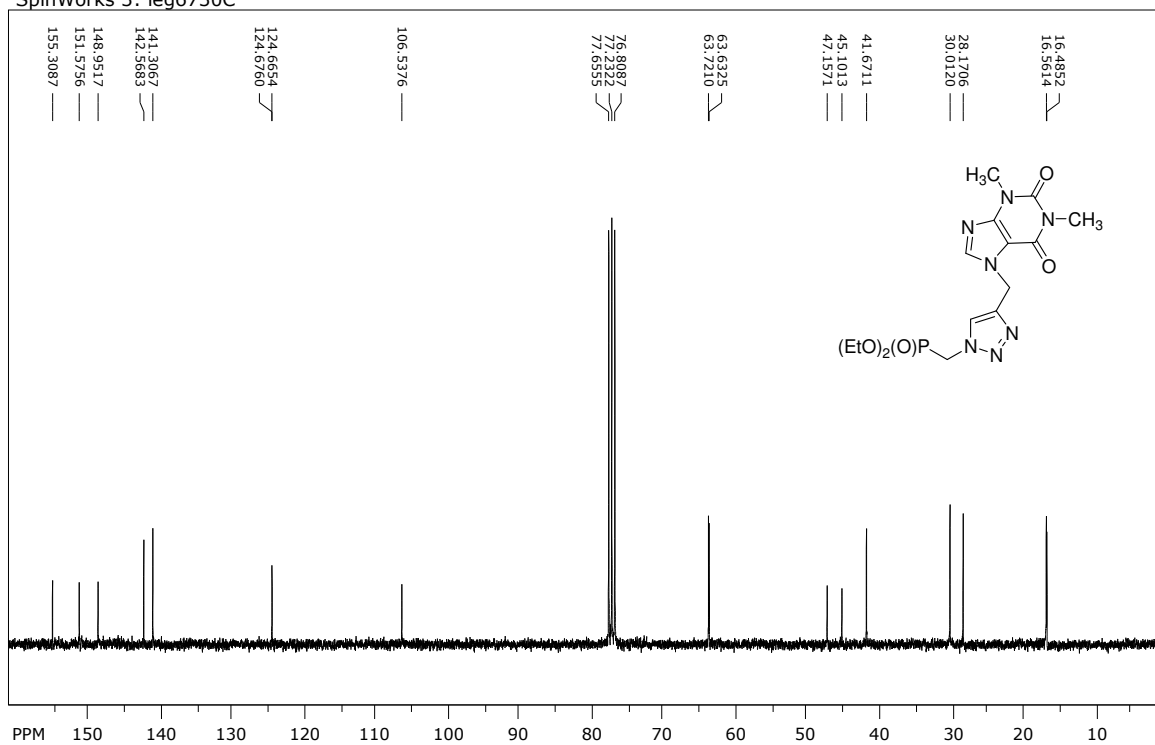

file: ...NMR-widma\NMR\IEG\ieg6730C.fid\fid block# 1 expt: "s2pul"  
transmitter freq.: 75.457729 MHz  
time domain size: 68096 points  
width: 18761.73 Hz = 248.6389 ppm = 0.275519 Hz/pt  
number of scans: 576

freq. of 0 ppm: 75.450189 MHz  
processed size: 131072 complex points  
LB: 1.000 GF: 0.0000  
Hz/cm: 486.160 ppm/cm: 6.44282

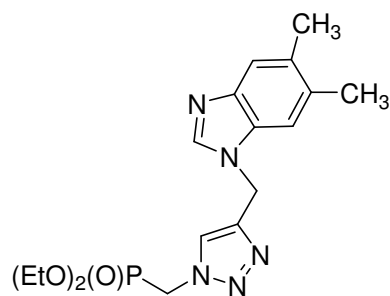

*Diethyl {4-[(5,6-dimethylbenzimidazol-1-yl)methyl]-1H-1,2,3-triazol-1-yl}methylphosphonate* **20j**. White powder; m.p.: 100–102°C; IR (KBr):  $\nu = 3004, 2960, 2945, 1025, 846, 757 \text{ cm}^{-1}$ ;  $^1\text{H NMR}$  (300 MHz,  $\text{CDCl}_3$ ):  $\delta = 7.93$  (s, 1H); 7.52 (s, 1H); 7.56 (s, 1H); 7.18 (s, 1H); 5.46 (s, 2H,  $\text{CH}_2$ ); 4.69 (d,  $J = 13.3 \text{ Hz}$ , 2H,  $\text{PCH}_2$ ); 4.11–4.01 (m, 4H,  $2 \times \text{POCH}_2\text{CH}_3$ );

2.36 (s, 6H,  $2 \times \text{CH}_3$ ); 1.22 (t,  $J = 7.2 \text{ Hz}$ , 6H,  $2 \times \text{POCH}_2\text{CH}_3$ );  $^{13}\text{C NMR}$  (75.5 MHz,  $\text{CDCl}_3$ ):  $\delta = 143.5; 142.1; 141.9; 132.4; 131.8; 131.3; 123.3; 120.1; 110.0; 63.6$  (d,  $J = 6.6 \text{ Hz}$ , POC); 46.0 (d,  $J = 154.9 \text{ Hz}$ , PC); 40.5; 20.6; 20.3; 16.3 (d,  $J = 5.8 \text{ Hz}$ , POCC);  $^{31}\text{P NMR}$  (121.5 MHz,  $\text{CDCl}_3$ ):  $\delta = 16.52 \text{ ppm}$ . Anal. Calcd. for  $\text{C}_{17}\text{H}_{24}\text{N}_5\text{O}_3\text{P}$ : C, 54.11; H, 6.41; N, 18.56. Found: C, 53.97; H, 6.38; N, 18.44.

## $^1\text{H NMR}$

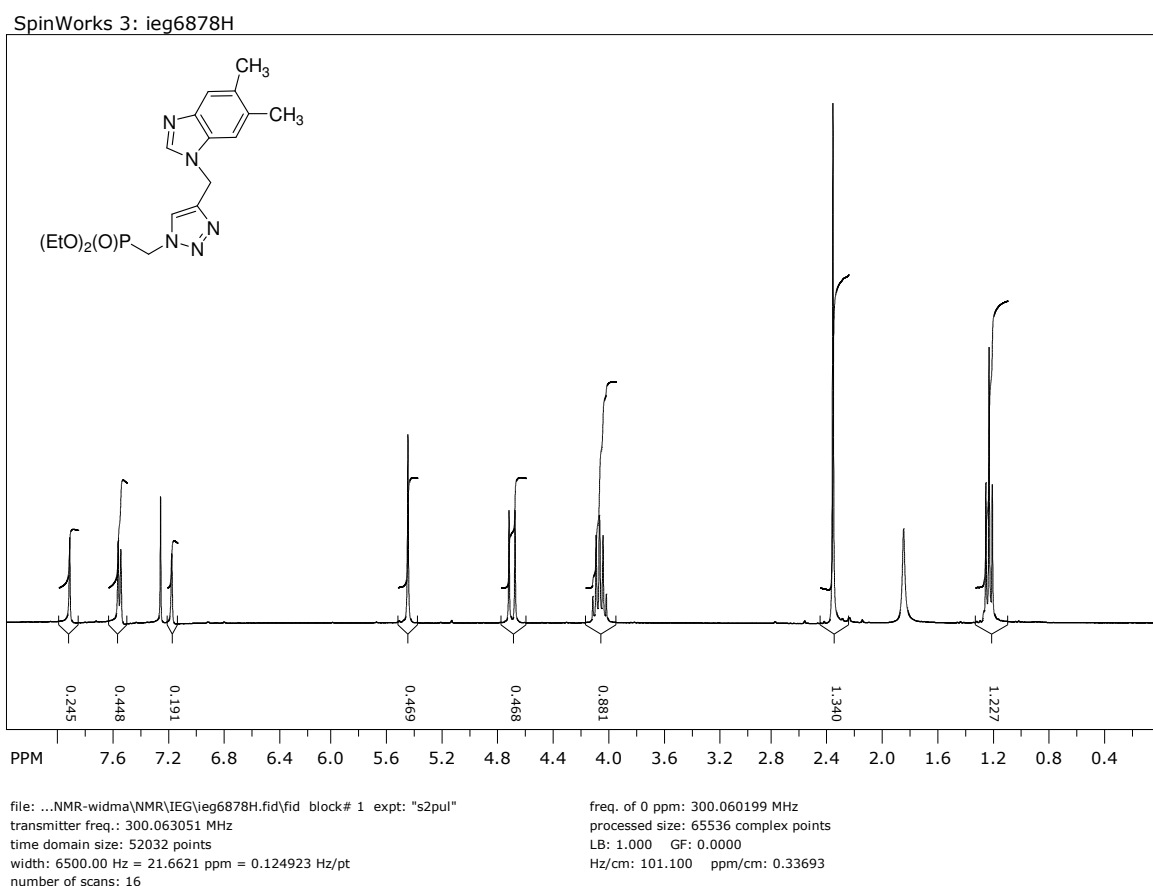

# <sup>13</sup>C NMR

SpinWorks 3: ieg6877C

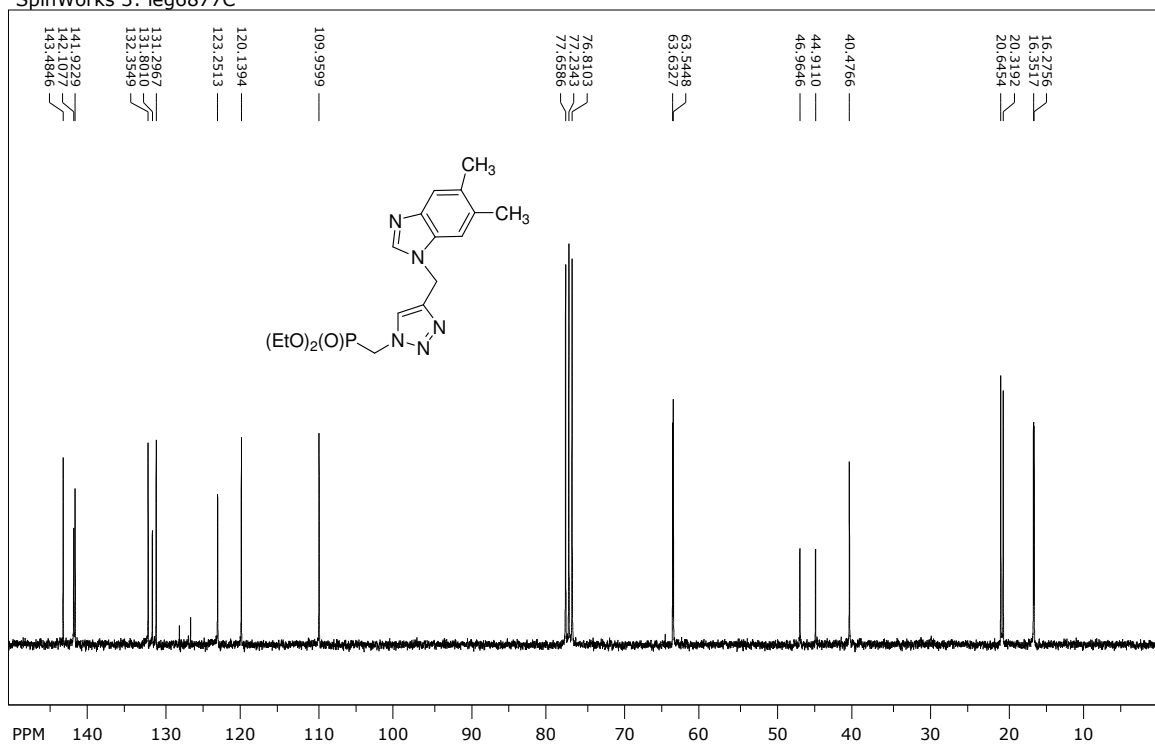

file: ...NMR-widma\NMR\IEG\ieg6877c.fid\fid block# 1 expt: "s2pul"  
transmitter freq.: 75.457729 MHz  
time domain size: 68096 points  
width: 18761.73 Hz = 248.6389 ppm = 0.275519 Hz/pt  
number of scans: 800

freq. of 0 ppm: 75.450197 MHz  
processed size: 131072 complex points  
LB: 1.000 GF: 0.0000  
Hz/cm: 456.261 ppm/cm: 6.04658

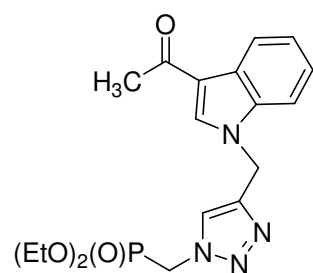

Diethyl 4-[(3-acetylidol-1-yl)methyl]-1H-1,2,3-triazol-1-yl)methylphosphonate **20k**. White solid; m.p.: 128–129°C; IR (KBr):  $\nu = 3004, 2960, 2945, 1025, 846, 757 \text{ cm}^{-1}$ ;  $^1\text{H NMR}$  (300 MHz,  $\text{CDCl}_3$ ):  $\delta = 8.42\text{--}8.34$  (m, 1H); 7.86 (s, 1H, HC5'); 7.62 (s, 1H); 7.45–7.36 (m, 1H); 7.33–7.24 (m, 2H); 5.48 (s, 2H,  $\text{CH}_2$ ); 4.70 (d,  $J = 13.3 \text{ Hz}$ , 2H,  $\text{PCH}_2$ ); 4.10–4.00 (m, 4H,  $2 \times \text{POCH}_2\text{CH}_3$ ); 2.25 (s, 3H,  $\text{CH}_3$ ); 1.21 (t,  $J = 6.9 \text{ Hz}$ , 6H,  $2 \times \text{POCH}_2\text{CH}_3$ );  $^{13}\text{C NMR}$  (75.5 MHz,  $\text{CDCl}_3$ ):  $\delta = 192.9$  (s,  $\text{C}=\text{O}$ ); 143.6; 136.6; 134.6; 126.6; 123.7; 123.3; 123.0; 122.9; 117.9; 109.9; 63.8 (d,  $J = 6.5 \text{ Hz}$ , POC); 46.3 (d,  $J = 155.4 \text{ Hz}$ , PC); 42.7; 27.9 (s,  $\text{CH}_3$ ); 16.5 (d,  $J = 5.7 \text{ Hz}$ , POCC);  $^{31}\text{P NMR}$  (121.5 MHz,  $\text{CDCl}_3$ ):  $\delta = 16.51 \text{ ppm}$ . Anal. Calcd. for  $\text{C}_{18}\text{H}_{23}\text{N}_4\text{O}_4\text{P}$ : C, 55.38; H, 5.94; N, 14.35. Found: C, 55.12; H, 6.09; N, 14.44.

## $^1\text{H NMR}$

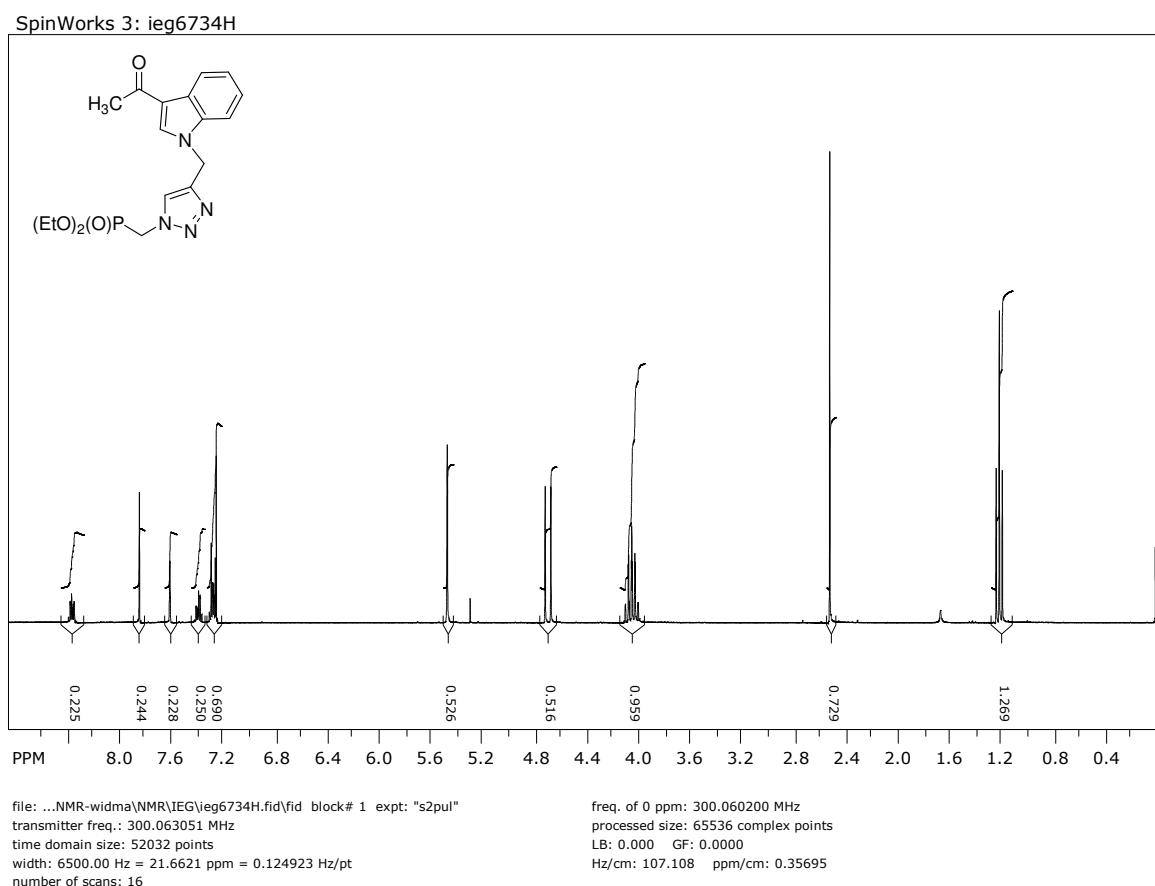

# <sup>13</sup>C NMR

SpinWorks 3: ieg6734c

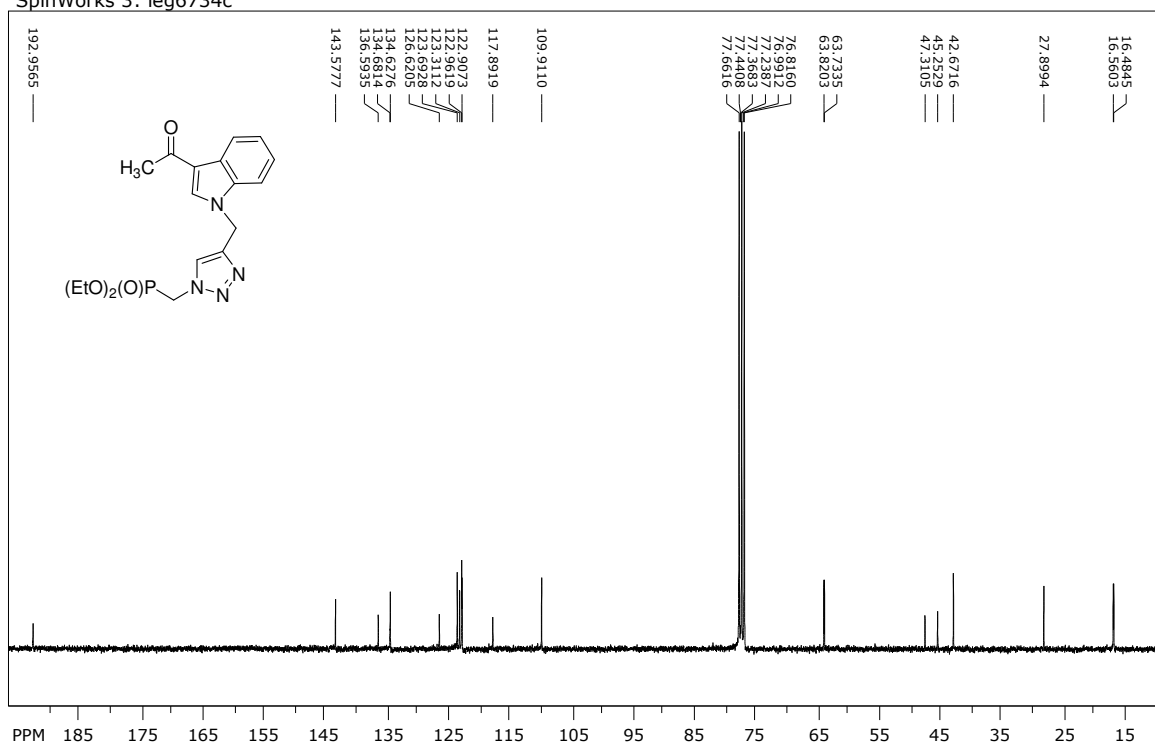

file: ...NMR-widma\NMR\IEG\ieg6734c.fid\fid block# 1 expt: "s2pul"  
transmitter freq.: 75.457729 MHz  
time domain size: 68096 points  
width: 18761.73 Hz = 248.6389 ppm = 0.275519 Hz/pt  
number of scans: 5000

freq. of 0 ppm: 75.450184 MHz  
processed size: 131072 complex points  
LB: 1.000 GF: 0.0000  
Hz/cm: 568.682 ppm/cm: 7.53643

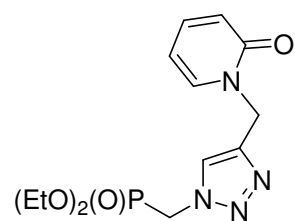

*Diethyl* {4-[(2-oxopyridin-1-yl)methyl]-1H-1,2,3-triazol-1-yl}methylphosphonate **201**. Brown solid; m.p.: 82–85°C; IR (KBr):  $\nu$  = 3080, 2985, 2935, 1660, 1025, 978  $\text{cm}^{-1}$ ;  $^1\text{H}$  NMR (300 MHz,  $\text{CDCl}_3$ ):  $\delta$  = 7.93 (s, 1H); 7.56 (dd,  $J$  = 6.7 Hz,  $J$  = 1.9 Hz, 1H); 7.31 (ddd,  $J$  = 9.2 Hz,  $J$  = 6.7 Hz,  $J$  = 1.9 Hz, 1H); 6.59 (d,  $J$  = 9.2 Hz, 1H); 6.17 (dt,  $J$  = 6.7 Hz,  $J$  = 1.2 Hz, 1H); 5.20 (s, 2H,  $\text{CH}_2$ ); 4.73 (d,  $J$  = 13.1 Hz, 2H,  $\text{PCH}_2$ ); 4.18–4.07 (m, 4H,  $2 \times \text{POCH}_2\text{CH}_3$ ); 1.29 (t,  $J$  = 6.9 Hz, 3H,  $\text{POCH}_2\text{CH}_3$ ); 1.28 (t,  $J$  = 6.9 Hz, 3H,  $\text{POCH}_2\text{CH}_3$ );  $^{13}\text{C}$  NMR (75.5 MHz,  $\text{CDCl}_3$ ):  $\delta$  = 162.1 (s,  $\text{C}=\text{O}$ ); 142.9 (s,  $\text{HC}=\text{C}$ ); 139.9; 137.6; 124.9 (s,  $\text{HC}=\text{C}$ ); 120.6; 106.4; 63.5 (d,  $J$  = 6.7 Hz,  $\text{POC}$ ); 45.8 (d,  $J$  = 154.5 Hz,  $\text{PC}$ ); 44.4; 16.3 (d,  $J$  = 5.7 Hz,  $\text{POCC}$ );  $^{31}\text{P}$  NMR (121.5 MHz,  $\text{CDCl}_3$ ):  $\delta$  = 16.62 ppm. Anal. Calcd. for  $\text{C}_{13}\text{H}_{19}\text{N}_4\text{O}_4\text{P}$ : C, 47.85; H, 5.87; N, 17.17. Found: C, 48.01; H, 6.00; N, 17.25.

## $^1\text{H}$ NMR

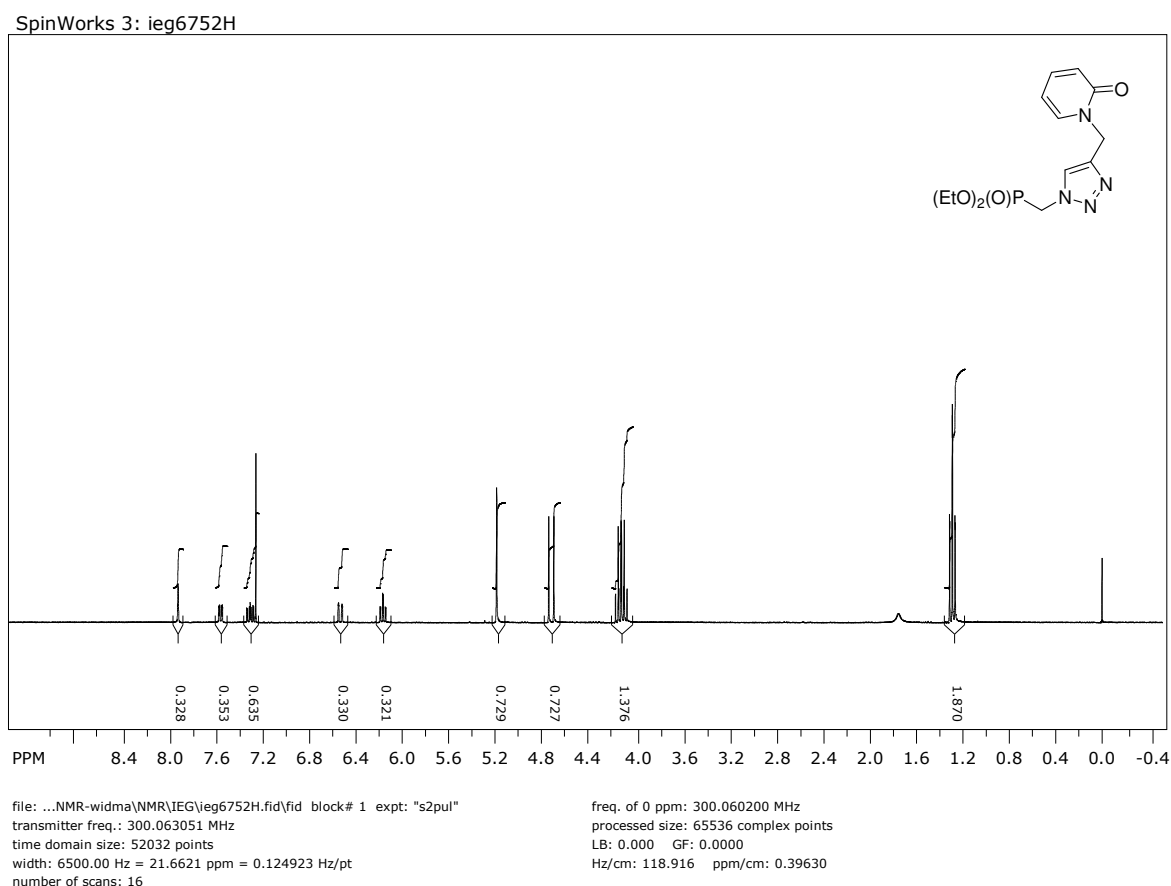

# <sup>13</sup>C NMR

SpinWorks 3: ieg6747c

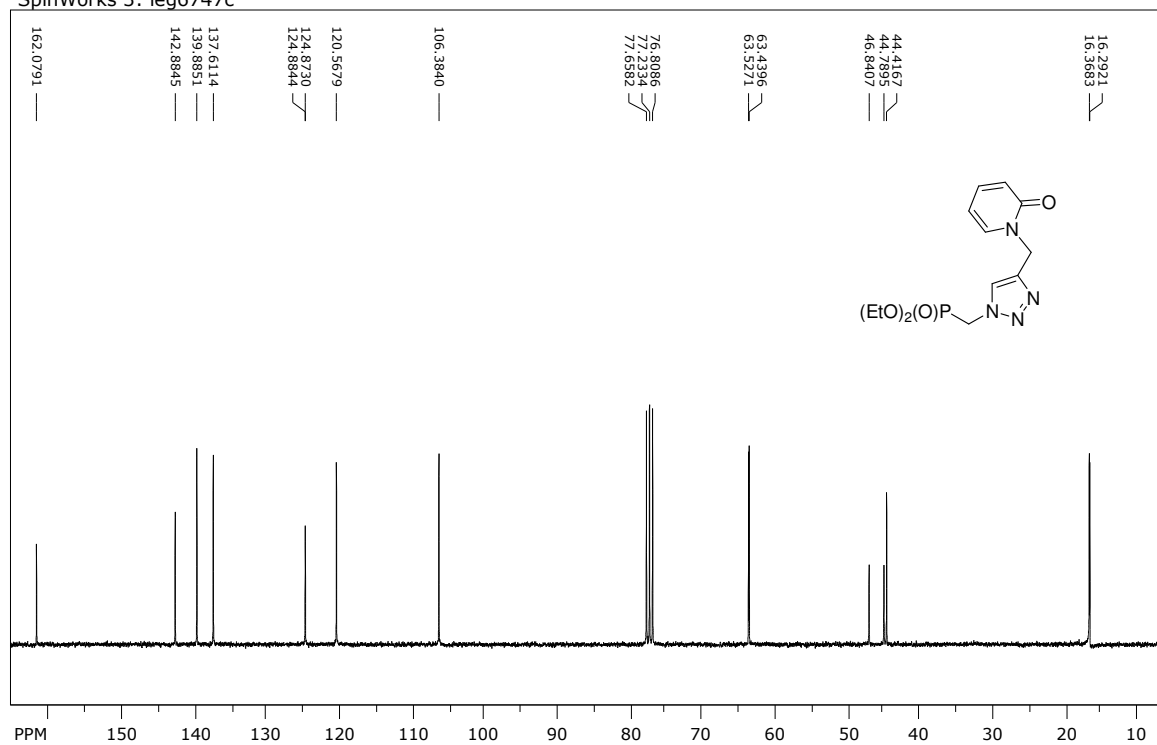

file: ...NMR-widma\NMR\IEG\ieg6747c.fid\fid block# 1 expt: "s2pul"  
transmitter freq.: 75.457729 MHz  
time domain size: 68096 points  
width: 18761.73 Hz = 248.6389 ppm = 0.275519 Hz/pt  
number of scans: 976

freq. of 0 ppm: 75.450199 MHz  
processed size: 131072 complex points  
LB: 1.000 GF: 0.0000  
Hz/cm: 481.975 ppm/cm: 6.38734



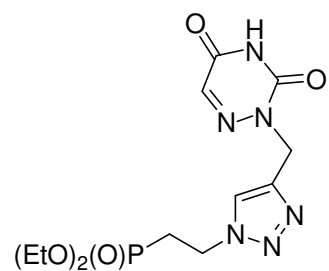

*Diethyl 2-[4-[(3,5-dioxo-1,2,4-triazin-2-yl)methyl]-1H-1,2,3-triazol-1-yl]ethylphosphonate* **21f**. White solid; m.p.: 119– 121°C; IR (KBr):  $\nu = 3301, 2999, 2985, 1688, 1220, 1045 \text{ cm}^{-1}$ ;  $^1\text{H}$  NMR (300 MHz,  $\text{CDCl}_3$ ):  $\delta = 11.80$  (s, 1H, NH); 7.90 (s, 1H); 7.41 (s, 1H); 5.22 (s, 2H,  $\text{CH}_2$ ); 4.68–4.50 (m, 2H,  $\text{PCH}_2$ ); 4.16–4.04 (m, 4H,  $2 \times \text{POCH}_2\text{CH}_3$ ); 2.78–2.62 (m, 2H,  $\text{PCCH}_2$ ); 1.31 (t,  $J = 7.1 \text{ Hz}$ , 6H,  $2 \times \text{POCH}_2\text{CH}_3$ );  $^{13}\text{C}$  NMR (75.5 MHz,  $\text{CDCl}_3$ ):  $\delta = 155.9$  (s, C=O); 149.1 (C=O); 141.6 (s, HC=C); 134.7 (s, HC=N); 124.4 (s, HC=C); 62.5 (d,  $J = 6.6 \text{ Hz}$ , POC); 44.5; 34.6; 27.2 (d,  $J = 140.9 \text{ Hz}$ , PC); 16.4 (d,  $J = 6.0 \text{ Hz}$ , POCC);  $^{31}\text{P}$  NMR (121.5 MHz,  $\text{CDCl}_3$ ):  $\delta = 27.15 \text{ ppm}$ . Anal. Calcd. for  $\text{C}_{12}\text{H}_{19}\text{N}_6\text{O}_5\text{P}$ : C, 40.23; H, 5.35; N, 23.46. Found: C, 40.06; H, 5.21; N, 23.55.

## $^1\text{H}$ NMR

SpinWorks 3: ieg6798H

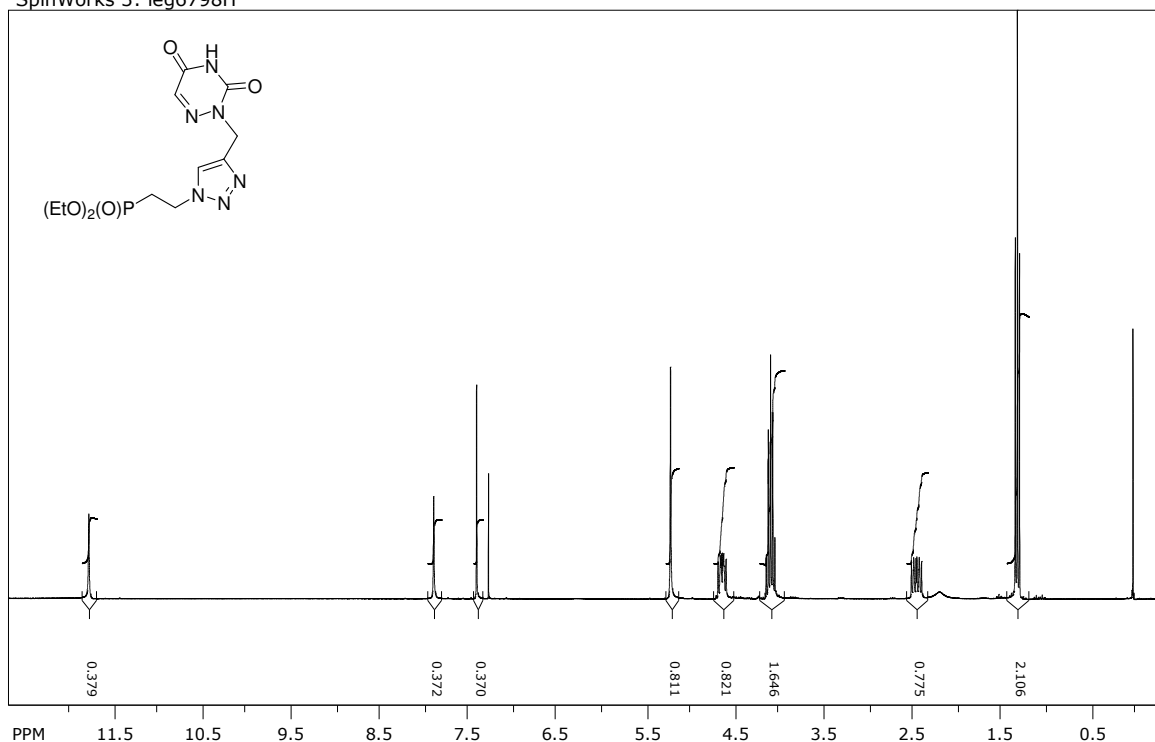

file: ...NMR-widma\NMR\IEG\ieg6798H.fid\fid block# 1 expt: "s2pul"  
 transmitter freq.: 300.063051 MHz  
 time domain size: 52032 points  
 width: 6500.00 Hz = 21.6621 ppm = 0.124923 Hz/pt  
 number of scans: 16

freq. of 0 ppm: 300.060195 MHz  
 processed size: 65536 complex points  
 LB: 0.000 GF: 0.0000  
 Hz/cm: 156.414 ppm/cm: 0.52127

# <sup>13</sup>C NMR

SpinWorks 3: ieg6792c

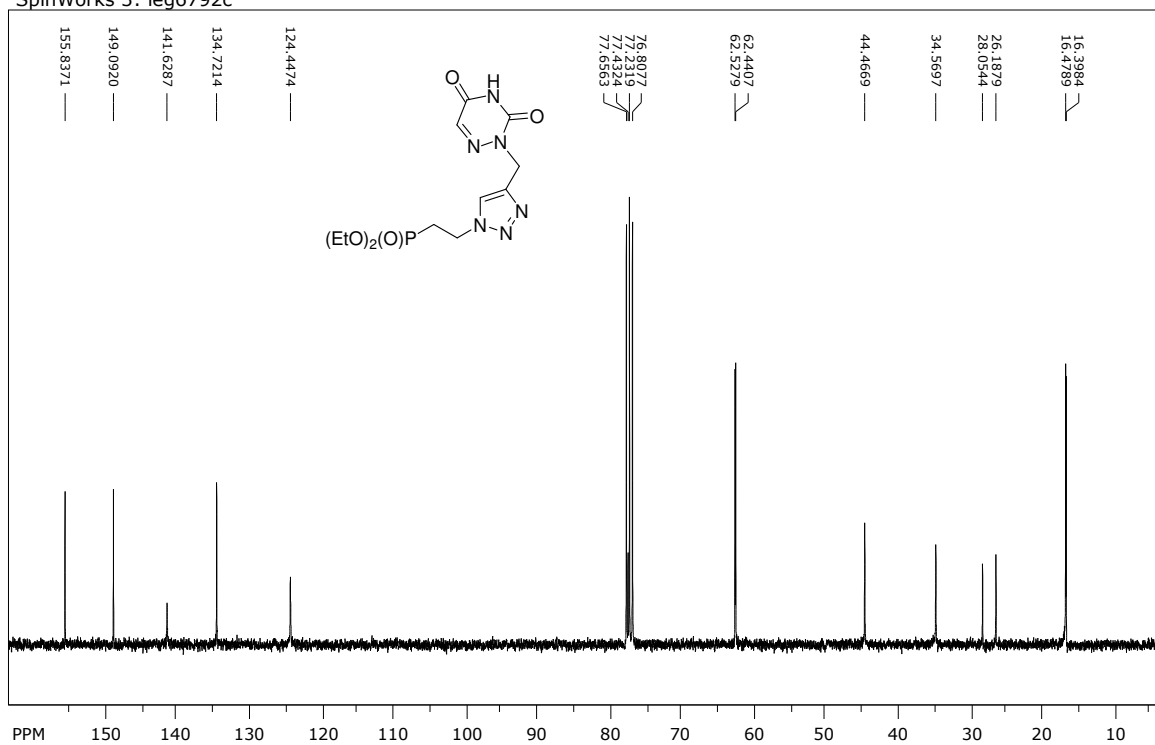

file: ...NMR-widma\NMR\IEG\ieg6792c.fid\fid block# 1 expt: "s2pul"  
transmitter freq.: 75.457729 MHz  
time domain size: 68096 points  
width: 18761.73 Hz = 248.6389 ppm = 0.275519 Hz/pt  
number of scans: 608

freq. of 0 ppm: 75.450198 MHz  
processed size: 131072 complex points  
LB: 1.000 GF: 0.0000  
Hz/cm: 484.964 ppm/cm: 6.42697

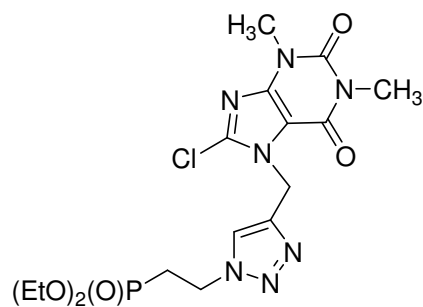

Diethyl 2-[4-[(8-chloro-1,3-dimethyl-2,6-dioxopurin-7-yl)methyl]-1H-1,2,3-triazol-1-yl]ethylphosphonate **21g**.

White solid; m.p.: 101–103°C; IR (KBr):  $\nu = 3426, 3139, 2953, 2903, 1703, 1661, 1250, 1043 \text{ cm}^{-1}$ ;  $^1\text{H}$  NMR (600 MHz,  $\text{CDCl}_3$ ):  $\delta = 7.85$  (s, 1H,  $\text{HC5}'$ ); 5.65 (s, 2H,  $\text{CH}_2$ ); 4.63–4.56 (m, 2H,  $\text{PCH}_2$ ); 4.13–4.05 (m, 4H,  $2 \times \text{POCH}_2\text{CH}_3$ ); 3.56 (s, 3H,  $\text{CH}_3$ ); 3.43 (s, 3H,  $\text{CH}_3$ ); 2.45–2.39 (m, 2H,  $\text{PCCH}_2$ ); 1.32 (t,  $J = 7.0$  Hz, 6H,  $2 \times \text{POCH}_2\text{CH}_3$ );  $^{13}\text{C}$  NMR (151 MHz,  $\text{CDCl}_3$ ):  $\delta = 155.4$  (s,  $\text{C}=\text{O}$ ); 151.2 (s,  $\text{C}=\text{O}$ ); 147.4; 141.8; 139.0; 123.9; 107.3; 62.2 (d,  $J = 6.0$  Hz, POC); 44.7; 40.9; 29.8; 28.0; 27.2 (d,  $J = 141.9$  Hz, PC); 16.3 (d,  $J = 5.7$  Hz, POCC);  $^{31}\text{P}$  NMR (243 MHz,  $\text{CDCl}_3$ ):  $\delta = 25.20$  ppm. Anal. Calcd. for  $\text{C}_{16}\text{H}_{23}\text{ClN}_7\text{O}_5\text{P}$ : C, 41.79; H, 5.04; N, 21.32. Found: C, 41.85; H, 4.94; N, 21.43.

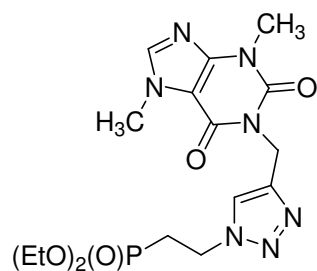

Diethyl 2-[4-[(3,7-dimethyl-2,6-dioxopurin-1-yl)methyl]-1H-1,2,3-triazol-1-yl]ethylphosphonate **21h**. White solid; m.p.: 100–102°C;

IR (KBr):  $\nu = 3133, 3087, 2989, 2830, 1701, 1665, 1233, 1023 \text{ cm}^{-1}$ ;  $^1\text{H}$  NMR (300 MHz,  $\text{CDCl}_3$ ):  $\delta = 7.67$  (s, 1H); 7.52 (d,  $J = 0.6$  Hz, 1H,  $\text{HC5}'$ ); 5.32 (s, 2H,  $\text{CH}_2$ ); 4.62–4.52 (m, 2H,  $\text{PCH}_2$ ); 4.14–4.00 (m, 4H,  $2 \times \text{POCH}_2\text{CH}_3$ ); 3.99 (d,  $J = 0.6$  Hz, 3H,  $\text{CH}_3$ ); 3.57 (s, 3H,  $\text{CH}_3$ ); 2.46–2.34 (m, 2H,  $\text{PCCH}_2$ ); 1.29 (t,  $J = 7.0$  Hz, 6H,  $2 \times \text{POCH}_2\text{CH}_3$ );  $^{13}\text{C}$  NMR (75.5 MHz,  $\text{CDCl}_3$ ):  $\delta = 154.7$  (s,  $\text{C}=\text{O}$ ); 151.2 (s,  $\text{C}=\text{O}$ ); 148.9; 143.6; 141.7; 123.5; 107.6; 62.2 (d,  $J = 6.3$  Hz, POC); 52.4; 44.6; 36.1; 31.9 (d,  $J = 293.7$  Hz, PC); 28.3; 26.5; 16.5 (d,  $J = 6.0$  Hz, POCC);  $^{31}\text{P}$  NMR (121.5 MHz,  $\text{CDCl}_3$ ):  $\delta = 26.59$  ppm. Anal. Calcd. for  $\text{C}_{16}\text{H}_{24}\text{N}_7\text{O}_5\text{P}$ : C, 45.18; H, 5.69; N, 23.05. Found: C, 45.00; H, 5.56; N, 22.96.

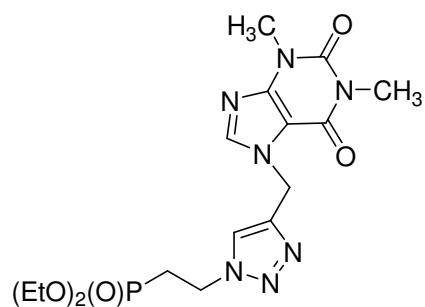

*Diethyl 2-{4-[(1,3-dimethyl-2,6-dioxopurin-7-yl)methyl]-1H-1,2,3-triazol-1-yl}ethylphosphonate* **21i**. Colourless oil; IR (film):  $\nu = 3033, 2987, 2889, 2830, 1703, 1666, 1230, 1023 \text{ cm}^{-1}$ ;  $^1\text{H NMR}$  (600 MHz,  $\text{CDCl}_3$ ):  $\delta = 7.89$  (s, 1H); 7.82 (s, 1H,  $\text{HC5}'$ ); 5.60 (s, 2H,  $\text{CH}_2$ ); 4.63–4.55 (m, 2H,  $\text{PCH}_2$ ); 4.13–4.08 (m, 4H,  $2 \times \text{POCH}_2\text{CH}_3$ ); 3.59 (s, 3H,  $\text{CH}_3$ ); 3.43 (s, 3H,  $\text{CH}_3$ ); 2.45–2.39 (m, 2H,  $\text{PCCH}_2$ ); 1.31 (t,  $J = 7.0 \text{ Hz}$ , 6H,  $2 \times \text{POCH}_2\text{CH}_3$ );  $^{13}\text{C NMR}$  (151 MHz,  $\text{CDCl}_3$ ):  $\delta = 155.4$  (s,  $\text{C}=\text{O}$ ); 151.6 (s,  $\text{C}=\text{O}$ ); 149.0; 142.2; 141.4; 123.9; 106.5; 62.2 (d,  $J = 5.8 \text{ Hz}$ ,  $\text{POC}$ ); 44.7; 41.4; 29.7; 28.0; 27.2 (d,  $J = 141.9 \text{ Hz}$ ,  $\text{PC}$ ); 16.3 (d,  $J = 6.0 \text{ Hz}$ ,  $\text{POCC}$ );  $^{31}\text{P NMR}$  (243 MHz,  $\text{CDCl}_3$ ):  $\delta = 25.15 \text{ ppm}$ . Anal. Calcd. for  $\text{C}_{16}\text{H}_{24}\text{N}_7\text{O}_5\text{P}$ : C, 45.18; H, 5.69; N, 23.05. Found: C, 45.30; H, 5.77; N, 23.17.

## $^1\text{H NMR}$

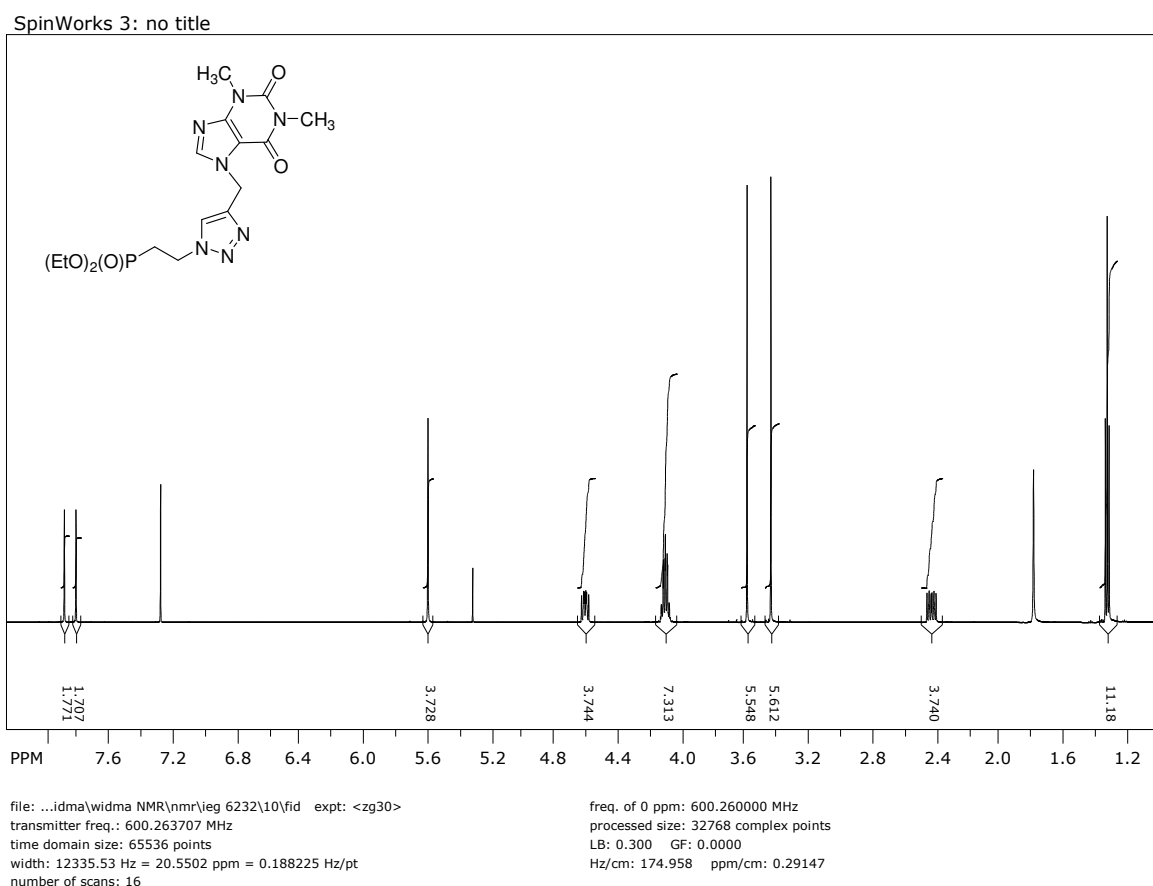

# <sup>13</sup>C NMR

SpinWorks 3: no title

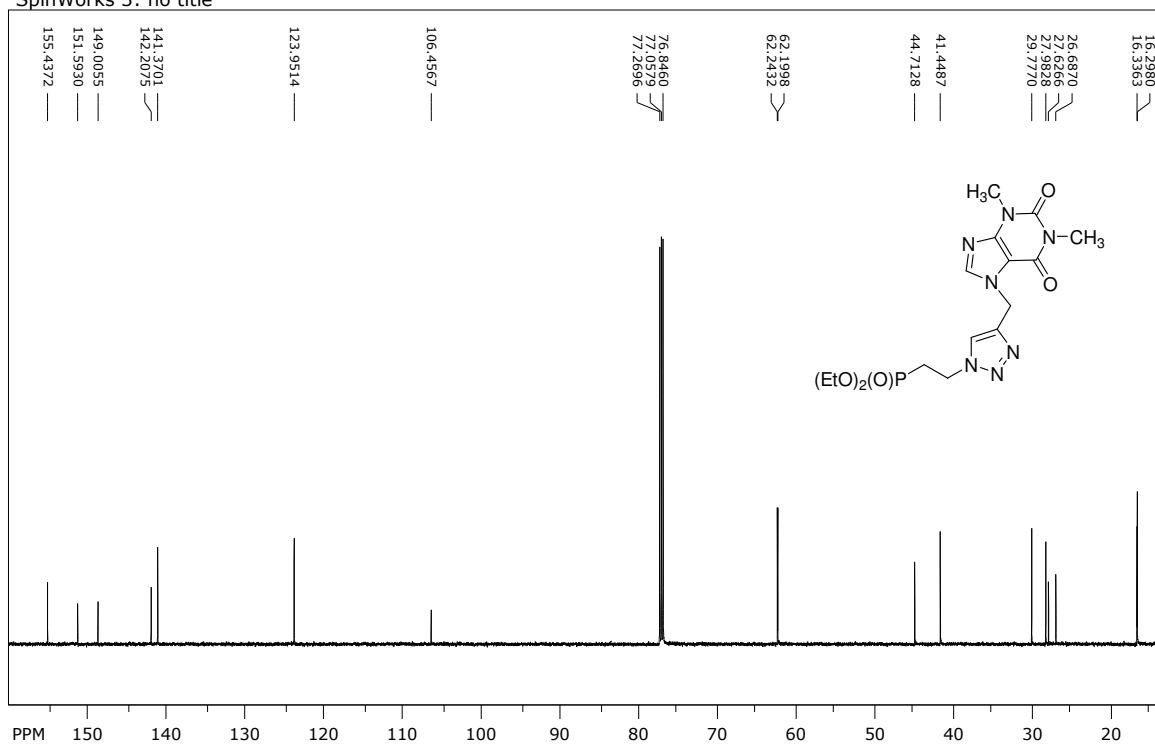

file: ...idma\widma NMR\nmr\ieq 6248\10\fid exp: <zpgg30>  
transmitter freq.: 150.950591 MHz  
time domain size: 65536 points  
width: 36057.69 Hz = 238.8708 ppm = 0.550197 Hz/pt  
number of scans: 512

freq. of 0 ppm: 150.935497 MHz  
processed size: 32768 complex points  
LB: 1.000 GF: 0.0000  
Hz/cm: 889.519 ppm/cm: 5.89278

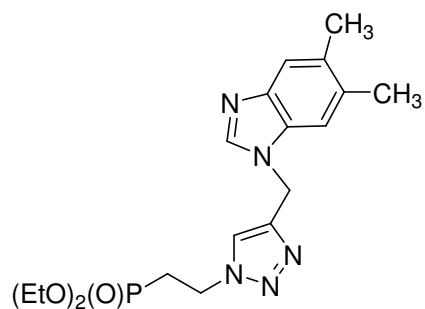

*Diethyl 2-{4-[(5,6-dimethylbenzimidazol-1-yl)methyl]-1H-1,2,3-triazol-1-yl}ethylphosphonate **21j***. Colourless oil; IR (film):  $\nu = 3014, 2950, 2895, 1045, 856, 759 \text{ cm}^{-1}$ ;  $^1\text{H}$  NMR (600 MHz,  $\text{CDCl}_3$ ):  $\delta = 7.93$  (s, 1H); 7.58 (s, 1H); 7.43 (s, 1H); 7.23 (s, 1H); 5.45 (s, 2H,  $\text{CH}_2$ ); 4.54 (dt,  $J = 12.7 \text{ Hz}$ ,  $J = 7.7 \text{ Hz}$ , 2H,  $\text{PCH}_2$ ); 4.06–4.00 (m, 4H,  $2 \times \text{POCH}_2\text{CH}_3$ ); 2.38 (dt,  $J = 18.5 \text{ Hz}$ ,  $J = 7.7 \text{ Hz}$ , 2H,  $\text{PCCH}_2$ ); 2.39 (s, 3H,  $\text{CH}_3$ ); 2.38 (s, 3H,  $\text{CH}_3$ ); 1.26 (t,  $J = 7.0 \text{ Hz}$ , 6H,  $2 \times \text{POCH}_2\text{CH}_3$ );  $^{13}\text{C}$  NMR (151 MHz,  $\text{CDCl}_3$ ):  $\delta = 143.3$ ; 142.4; 142.0; 132.5; 132.0; 131.4; 122.5; 120.3; 109.9; 62.2 (d,  $J = 6.5 \text{ Hz}$ , POC); 44.7 (d,  $J = 1.7 \text{ Hz}$ , C-2); 40.4; 27.0 (d,  $J = 142.0 \text{ Hz}$ , PC); 20.5; 20.2; 16.2 (d,  $J = 6.4 \text{ Hz}$ , POCC);  $^{31}\text{P}$  NMR (243 MHz,  $\text{CDCl}_3$ ):  $\delta = 25.27 \text{ ppm}$ . Anal. Calcd. for  $\text{C}_{18}\text{H}_{26}\text{N}_5\text{O}_3\text{P}$ : C, 55.24; H, 6.70; N, 17.89. Found: C, 55.08; H, 6.84; N, 17.72.

### $^1\text{H}$ NMR

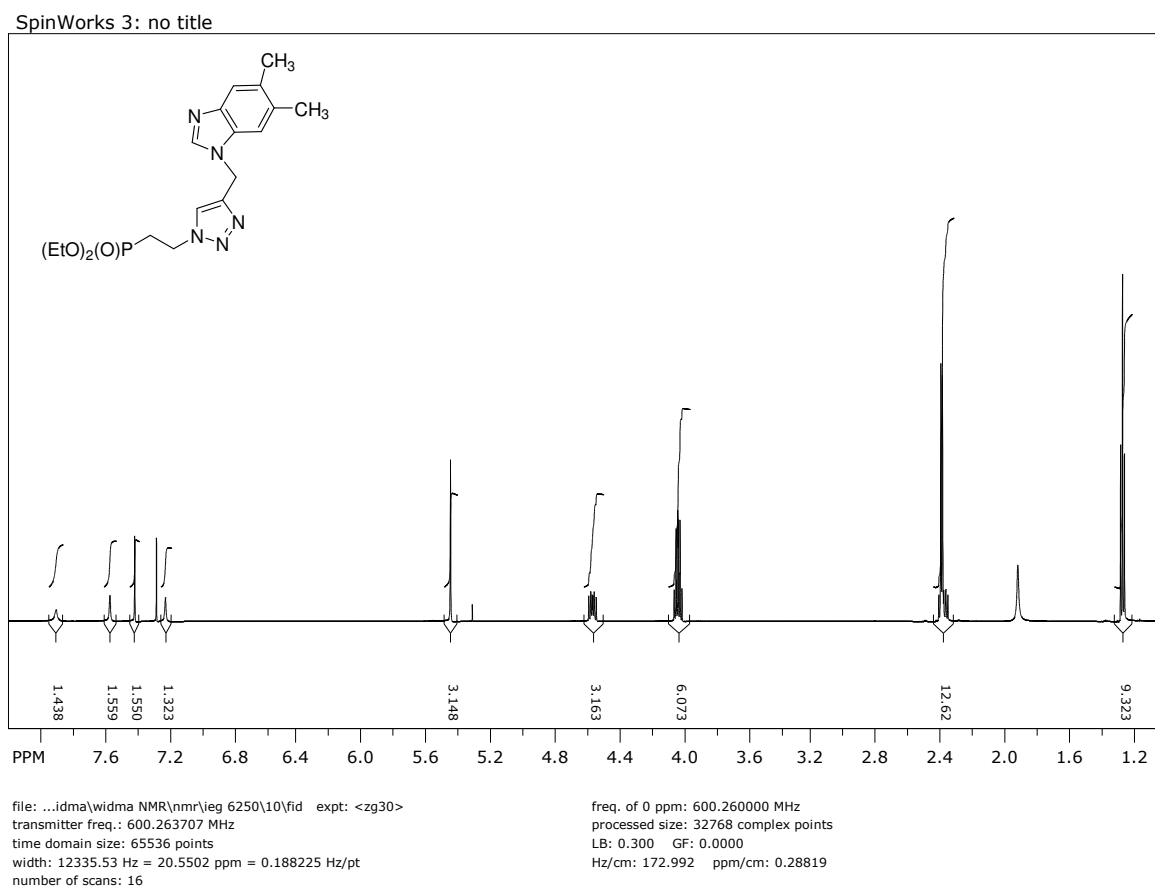

# <sup>13</sup>C NMR

SpinWorks 3:

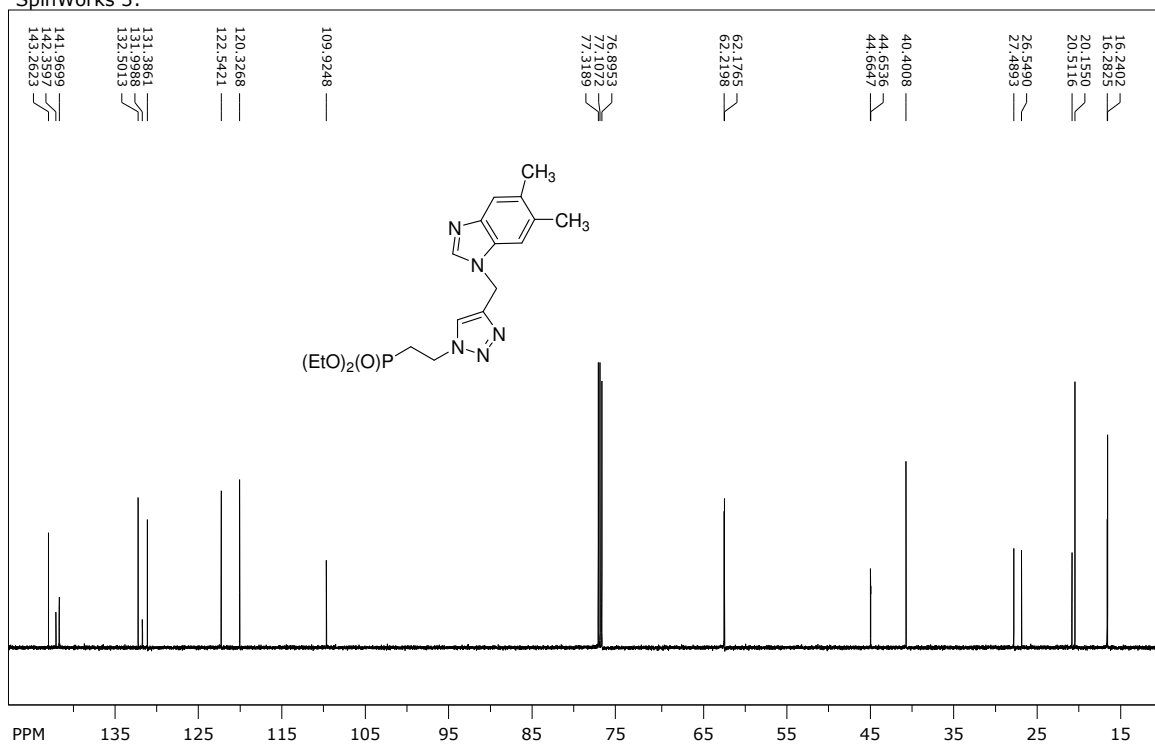

file: ...widma\widma NMR\nmr\ieg-6270\1\fid exp: <zpgg30>  
transmitter freq.: 150.950591 MHz  
time domain size: 65536 points  
width: 36057.69 Hz = 238.8708 ppm = 0.550197 Hz/pt  
number of scans: 512

freq. of 0 ppm: 150.935497 MHz  
processed size: 32768 complex points  
LB: 0.000 GF: 0.0000  
Hz/cm: 835.504 ppm/cm: 5.53495

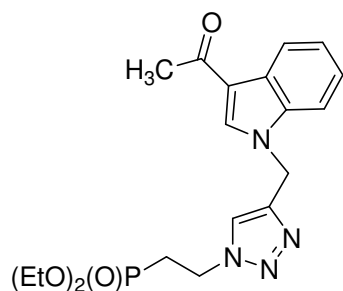

*Diethyl 2-[4-[(3-acetylidol-1-yl)methyl]-1H-1,2,3-triazol-1-yl]ethylphosphonate* **21k**. White solid; m.p.: 83–84°C; IR (KBr):  $\nu = 3430, 3110, 2989, 1642, 1528, 1390, 1026, 753 \text{ cm}^{-1}$ ;  $^1\text{H}$  NMR (300 MHz,  $\text{CDCl}_3$ ):  $\delta = 8.44\text{--}8.32$  (m, 1H); 7.87 (s, 1H, HC5'); 7.47 (s, 1H); 7.45–7.42 (m, 1H); 7.32–7.29 (m, 2H); 5.47 (s, 2H,  $\text{CH}_2$ ); 4.61–4.52 (m, 2H,  $\text{PCH}_2$ ); 4.05–3.94 (m, 4H,  $2\times\text{POCH}_2\text{CH}_3$ ); 2.55 (s, 3H,  $\text{CH}_3$ ); 2.42–2.31 (m, 2H,  $\text{PCCCH}_2$ ); 1.22 (t,  $J = 6.8 \text{ Hz}$ , 6H,  $2\times\text{POCH}_2\text{CH}_3$ );  $^{13}\text{C}$  NMR (75.5 MHz,  $\text{CDCl}_3$ ):  $\delta = 192.9$  (s,  $\text{C}=\text{O}$ ); 142.8; 136.4; 134.8; 126.3; 123.5; 122.7; 122.7; 122.6; 117.4; 109.8; 62.2 (d,  $J = 6.6 \text{ Hz}$ , POC); 44.7 (d,  $J = 2.0 \text{ Hz}$ , PCC); 42.3; 27.7 (s,  $\text{CH}_3$ ); 27.1 (d,  $J = 141.4 \text{ Hz}$ , PC); 16.4 (d,  $J = 5.7 \text{ Hz}$ , POCC);  $^{31}\text{P}$  NMR (121.5 MHz,  $\text{CDCl}_3$ ):  $\delta = 26.39$  ppm. Anal. Calcd. for  $\text{C}_{19}\text{H}_{25}\text{N}_4\text{O}_4\text{P}$ : C, 56.43; H, 6.23; N, 13.85. Found: C, 56.54; H, 6.14; N, 13.72.

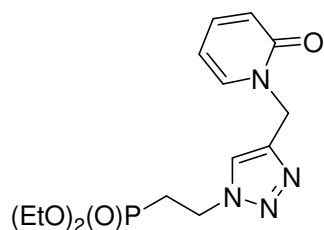

*Diethyl 2-[4-[(2-oxopyridin-1-yl)methyl]-1H-1,2,3-triazol-1-yl]ethylphosphonate* **21l**. Brown oil; IR (film):  $\nu = 3110, 2976, 2875, 1668, 1035, 988 \text{ cm}^{-1}$ ;  $^1\text{H}$  NMR (300 MHz,  $\text{CDCl}_3$ ):  $\delta = 7.84$  (s, 1H); 7.59 (dd,  $J = 6.8 \text{ Hz}$ ,  $J = 1.6 \text{ Hz}$ , 1H); 7.33 (ddd,  $J = 9.2 \text{ Hz}$ ,  $J = 6.8 \text{ Hz}$ ,  $J = 2.0 \text{ Hz}$ , 1H); 6.55 (dd,  $J = 9.2 \text{ Hz}$ ,  $J = 0.5 \text{ Hz}$ , 1H); 6.19 (dt,  $J = 6.8 \text{ Hz}$ ,  $J = 1.6 \text{ Hz}$ , 1H); 5.18 (s, 2H,  $\text{CH}_2$ ); 4.62–4.52 (m, 2H,  $\text{PCH}_2$ ); 4.13–4.03 (m, 4H,  $2\times\text{POCH}_2\text{CH}_3$ ); 2.46–2.35 (m, 2H,  $\text{PCCCH}_2$ ); 1.29 (t,  $J = 7.0 \text{ Hz}$ , 3H,  $\text{POCH}_2\text{CH}_3$ ); 1.28 (t,  $J = 6.9 \text{ Hz}$ , 3H,  $\text{POCH}_2\text{CH}_3$ );  $^{13}\text{C}$  NMR (75.5 MHz,  $\text{CDCl}_3$ ):  $\delta = 162.2$  (s,  $\text{C}=\text{O}$ ); 142.5 (s,  $\text{HC}=\text{C}$ ); 140.0; 137.7; 124.3 (s,  $\text{HC}=\text{C}$ ); 120.6; 106.5; 62.2 (d,  $J = 6.3 \text{ Hz}$ , POC); 44.6 (d,  $J = 2.8 \text{ Hz}$ , PCC); 27.1 (d,  $J = 141.2 \text{ Hz}$ , PC); 16.4 (d,  $J = 6.0 \text{ Hz}$ , POCC);  $^{31}\text{P}$  NMR (121.5 MHz,  $\text{CDCl}_3$ ):  $\delta = 26.37$  ppm. Anal. Calcd. for  $\text{C}_{14}\text{H}_{21}\text{N}_4\text{O}_4\text{P}$ : C, 49.41; H, 6.22; N, 16.46. Found: C, 49.24; H, 6.09; N, 16.28.



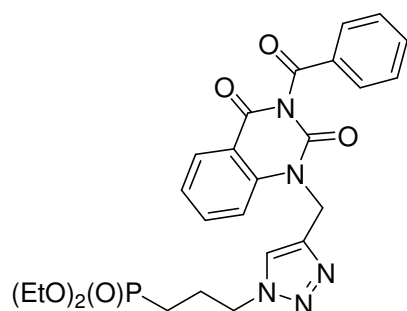

*Diethyl 3-{4-[(3-benzoyl-2,4-dioxoquinazolin-1-yl)methyl]-1H-1,2,3-triazol-1-yl}propylphosphonate* **22e**. Colourless oil; IR (film):  $\nu = 3141, 3064, 2939, 1799, 1606, 1481; 1220, 1025 \text{ cm}^{-1}$ ;  $^1\text{H NMR}$  (300 MHz,  $\text{CDCl}_3$ ):  $\delta = 8.20$  (dd,  $J = 7.9 \text{ Hz}, J = 1.6 \text{ Hz}, 1\text{H}$ );  $8.00\text{--}7.95$  (m, 2H,  $2\times o\text{-CH}$ );  $7.91$  (d,  $J = 8.5 \text{ Hz}, 1\text{H}$ );  $7.78$  (ddd,  $J = 8.5 \text{ Hz}, J = 7.9 \text{ Hz}, J = 1.6 \text{ Hz}, 1\text{H}$ );  $7.71$  (s, 1H,  $\text{HC}5'$ );  $7.70\text{--}7.62$  (m, 1H,  $p\text{-CH}$ );  $7.54\text{--}7.48$  (m, 2H,  $2\times m\text{-CH}$ );  $7.32$  (dt,  $J = 7.9 \text{ Hz}, J = 0.8 \text{ Hz}, 1\text{H}$ );  $5.40$  (s, 2H,  $\text{CH}_2$ );  $4.41$  (t,  $J = 7.0 \text{ Hz}, 2\text{H}, \text{PCCCH}_2$ );  $4.16\text{--}3.99$  (m, 4H,  $2\times\text{POCH}_2\text{CH}_3$ );  $2.20$  (dqv,  $J = 14.5 \text{ Hz}, J = 7.0 \text{ Hz}, 2\text{H}, \text{PCCCH}_2$ );  $1.71$  (dt,  $J = 18.7 \text{ Hz}, J = 7.0 \text{ Hz}, 2\text{H}, \text{PCH}_2$ );  $1.30$  (t,  $J = 7.1 \text{ Hz}, 6\text{H}, 2\times\text{POCH}_2\text{CH}_3$ );  $^{13}\text{C NMR}$  (75.5 MHz,  $\text{CDCl}_3$ ):  $\delta = 168.6$  (s,  $\text{C}=\text{O}$ );  $161.0$  (s,  $\text{C}=\text{O}$ );  $149.5$  (s,  $\text{C}=\text{O}$ );  $142.4$  (s,  $\text{HC}=\text{C}$ );  $140.2$ ;  $136.2$ ;  $135.2$ ;  $131.5$ ;  $130.5$ ;  $129.2$ ;  $128.9$ ;  $123.9$  (s,  $\text{HC}=\text{C}$ );  $123.8$ ;  $115.5$ ;  $115.3$ ;  $61.8$  (d,  $J = 6.7 \text{ Hz}, \text{POC}$ );  $50.3$  (d,  $J = 15.7 \text{ Hz}, \text{PCCC}$ );  $38.9$ ;  $23.7$  (d,  $J = 4.9 \text{ Hz}, \text{PCC}$ );  $22.8$  (d,  $J = 142.9 \text{ Hz}, \text{PC}$ );  $16.6$  (d,  $J = 6.0 \text{ Hz}, \text{POCC}$ );  $^{31}\text{P NMR}$  (121 MHz,  $\text{CDCl}_3$ ):  $\delta = 30.82 \text{ ppm}$ . Anal. Calcd. for  $\text{C}_{25}\text{H}_{28}\text{N}_5\text{O}_6\text{P}$ : C, 57.14; H, 5.37; N, 13.33. Found: C, 57.27; H, 5.49; N, 13.4.

$^1\text{H NMR}$

SpinWorks 3: ieg6495H

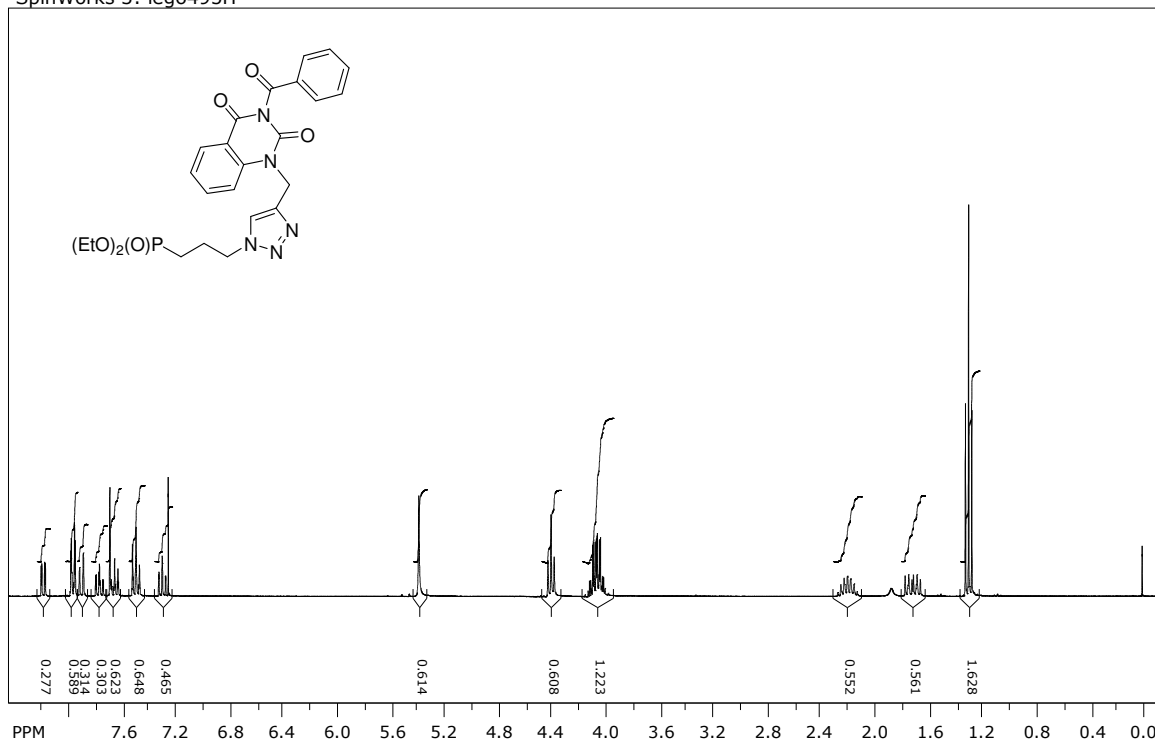

file: ...NMR-widma\NMR\IEG\ieg6495H.fid\fid block# 1 expt: "s2pul"  
 transmitter freq.: 300.063051 MHz  
 time domain size: 52032 points  
 width: 6500.00 Hz = 21.6621 ppm = 0.124923 Hz/pt  
 number of scans: 16

freq. of 0 ppm: 300.060198 MHz  
 processed size: 65536 complex points  
 LB: 0.000 GF: 0.0000  
 Hz/cm: 103.378 ppm/cm: 0.34452

# <sup>13</sup>C NMR

SpinWorks 3: ieg6464C

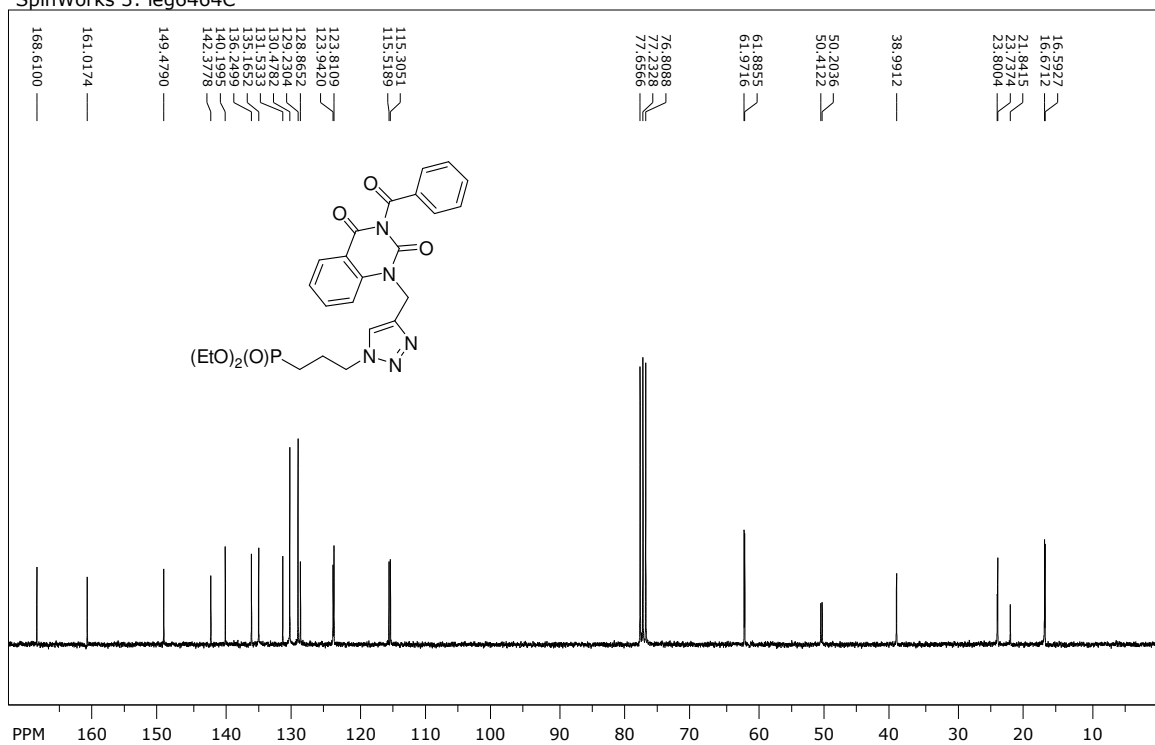

file: ...NMR-widma\NMR\IEG\ieg6464C.fid\fid block# 1 expt: "s2pul"  
transmitter freq.: 75.457729 MHz  
time domain size: 68096 points  
width: 18761.73 Hz = 248.6389 ppm = 0.275519 Hz/pt  
number of scans: 1024

freq. of 0 ppm: 75.450193 MHz  
processed size: 131072 complex points  
LB: 1.000 GF: 0.0000  
Hz/cm: 525.029 ppm/cm: 6.95793

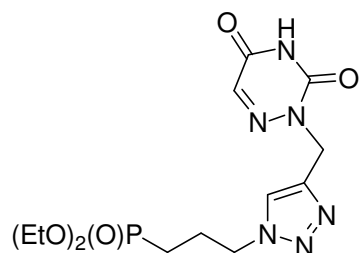

*Diethyl 3-[4-[(3,5-dioxo-1,2,4-triazin-2-yl)methyl]-1H-1,2,3-triazol-1-yl]propylphosphonate* **22f**. White solid; m.p.: 96–97°C; IR (KBr):  $\nu = 3384, 3232, 3138, 2984, 2908, 1730, 1677, 1217, 1025 \text{ cm}^{-1}$ ;  $^1\text{H NMR}$  (300 MHz,  $\text{CDCl}_3$ ):  $\delta = 11.51$  (s, 1H, NH); 7.77 (s, 1H,  $\text{HC}5'$ ); 7.40 (s, 1H); 5.22 (s, 2H,  $\text{CH}_2$ ); 4.44 (t,  $J = 7.0$  Hz, 2H,  $\text{PCCCH}_2$ ); 4.16–4.03 (m, 4H,  $2 \times \text{POCH}_2\text{CH}_3$ ); 2.21 (dqv,  $J = 14.9$  Hz,  $J = 7.0$  Hz, 2H,  $\text{PCCCH}_2$ ); 1.75 (dt,  $J = 19.0$  Hz,  $J = 7.0$  Hz, 2H,  $\text{PCH}_2$ ); 1.32 (t,  $J = 7.0$  Hz, 6H,  $2 \times \text{POCH}_2\text{CH}_3$ );  $^{13}\text{C NMR}$  (75.5 MHz,  $\text{CDCl}_3$ ):  $\delta = 155.8$  (s,  $\text{C}=\text{O}$ ); 148.9 ( $\text{C}=\text{O}$ ); 141.3 (s,  $\text{HC}=\text{C}$ ); 134.5 (s,  $\text{HC}=\text{N}$ ); 124.2 (s,  $\text{HC}=\text{C}$ ); 62.0 (d,  $J = 6.4$  Hz,  $\text{POC}$ ); 50.0 (d,  $J = 15.1$  Hz,  $\text{PCCC}$ ); 34.5; 23.4 (d,  $J = 4.3$  Hz,  $\text{PCC}$ ); 22.2 (d,  $J = 143.0$  Hz,  $\text{PC}$ ); 16.4 (d,  $J = 6.0$  Hz,  $\text{POCC}$ );  $^{31}\text{P NMR}$  (121.5 MHz,  $\text{CDCl}_3$ ):  $\delta = 31.41$  ppm. Anal. Calcd. for  $\text{C}_{13}\text{H}_{21}\text{N}_6\text{O}_5\text{P}$ : C, 41.94; H, 5.69; N, 22.57. Found: C, 42.08; H, 5.74; N, 22.67.

## $^1\text{H NMR}$

SpinWorks 3: ieg6820H

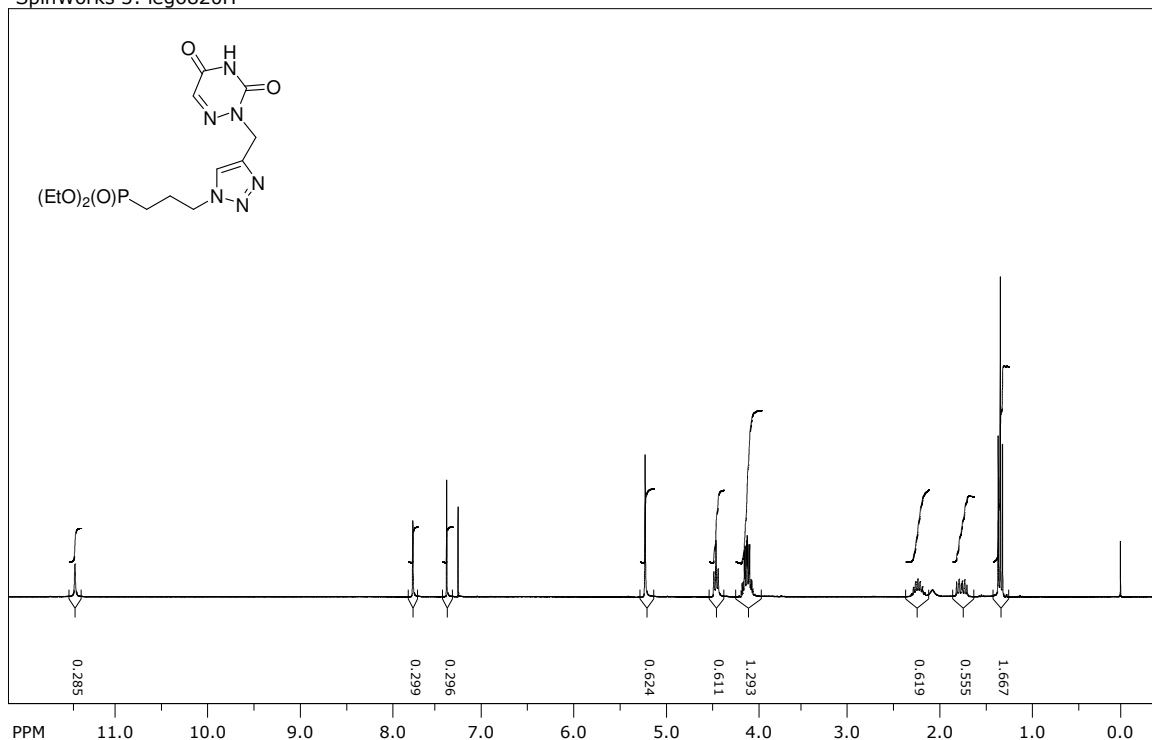

file: ...NMR-widma\NMR\IEG\ieg6820H.fid\fid block# 1 expt: "s2pul"  
 transmitter freq.: 300.063051 MHz  
 time domain size: 52032 points  
 width: 6500.00 Hz = 21.6621 ppm = 0.124923 Hz/pt  
 number of scans: 16

freq. of 0 ppm: 300.060198 MHz  
 processed size: 65536 complex points  
 LB: 0.000 GF: 0.0000  
 Hz/cm: 152.064 ppm/cm: 0.50677

# <sup>13</sup>C NMR

SpinWorks 3: ieg6820c

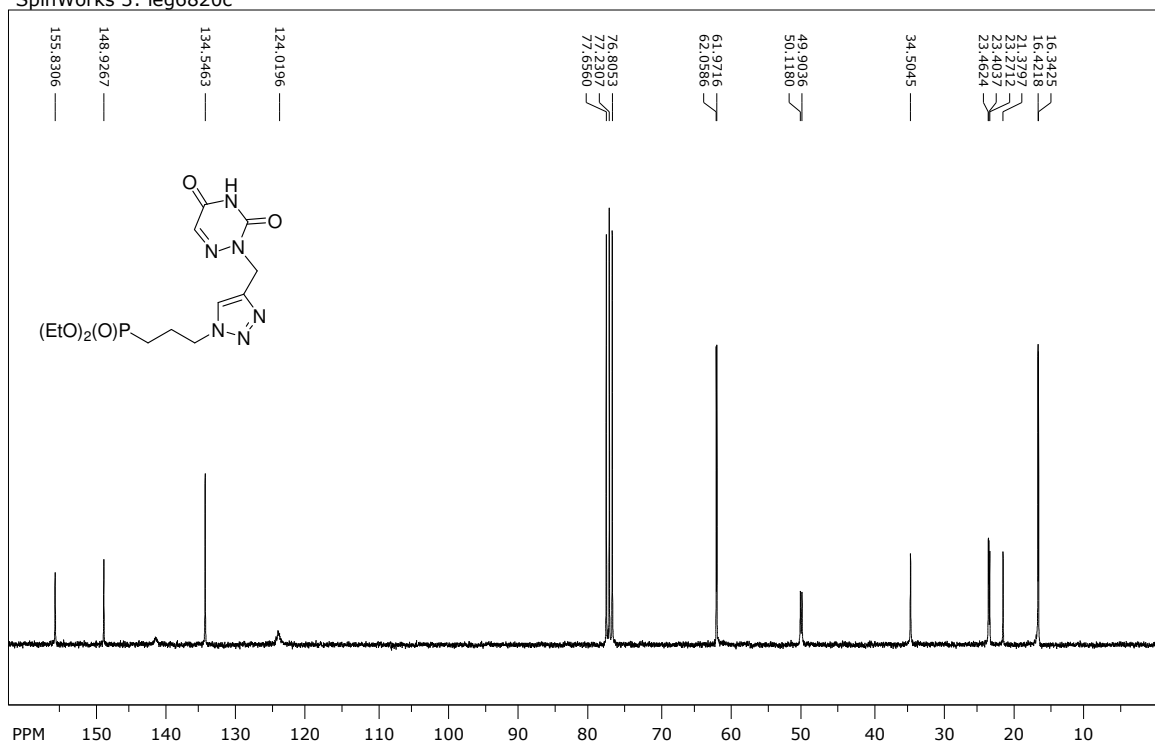

file: ...NMR-widma\NMR\IEG\ieg6820c.fid\fid block# 1 expt: "s2pul"  
transmitter freq.: 75.457729 MHz  
time domain size: 68096 points  
width: 18761.73 Hz = 248.6389 ppm = 0.275519 Hz/pt  
number of scans: 1456

freq. of 0 ppm: 75.450203 MHz  
processed size: 131072 complex points  
LB: 1.000 GF: 0.0000  
Hz/cm: 493.934 ppm/cm: 6.54584

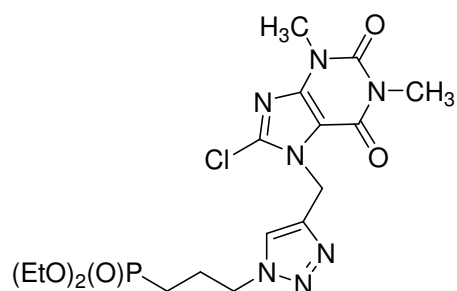

*Diethyl 3-{4-[(8-chloro-1,3-dimethyl-2,6-dioxopurin-7-yl)methyl]-1H-1,2,3-triazol-1-yl}propylphosphonate*

**22g.** White solid; m.p.: 127–128°C; IR (KBr):  $\nu = 3362, 3101, 2981, 2935, 1707, 1679, 1224, 1020, 956 \text{ cm}^{-1}$ ;  $^1\text{H}$  NMR (600 MHz,  $\text{CDCl}_3$ ):  $\delta = 7.83$  (s, 1H,  $\text{HC5}'$ ); 5.66 (s, 2H,  $\text{CH}_2$ ); 4.46 (t,  $J = 7.0$  Hz, 2H,  $\text{PCCCH}_2$ ); 4.15–4.05 (m, 4H,  $2 \times \text{POCH}_2\text{CH}_3$ ); 3.57 (s, 3H,  $\text{CH}_3$ ); 3.44 (s, 3H,  $\text{CH}_3$ ); 2.23 (dqv,  $J = 14.7$  Hz,  $J = 7.0$  Hz, 2H,  $\text{PCCH}_2$ ); 1.74 (dt,  $J = 18.7$  Hz,  $J = 7.0$  Hz, 2H,  $\text{PCH}_2$ ); 1.34 (t,  $J = 7.1$  Hz, 6H,  $2 \times \text{POCH}_2\text{CH}_3$ );  $^{13}\text{C}$  NMR (151 MHz,  $\text{CDCl}_3$ ):  $\delta = 154.5$  (s,  $\text{C}=\text{O}$ ); 151.2 (s,  $\text{C}=\text{O}$ ); 147.4; 141.8; 139.0; 123.7; 107.4; 61.8 (d,  $J = 6.4$  Hz, POC); 50.1 (d,  $J = 15.2$  Hz, PCCC); 41.0; 29.8; 27.9; 23.6 (d,  $J = 4.8$  Hz, PCC); 22.6 (d,  $J = 142.3$  Hz, PC); 16.4 (d,  $J = 6.1$  Hz, POCC);  $^{31}\text{P}$  NMR (243 MHz,  $\text{CDCl}_3$ ):  $\delta = 29.80$  ppm. Anal. Calcd. for  $\text{C}_{17}\text{H}_{25}\text{ClN}_7\text{O}_5\text{P}$ : C, 43.09; H, 5.32; N, 20.69. Found: C, 42.88; H, 5.44; N, 20.71.

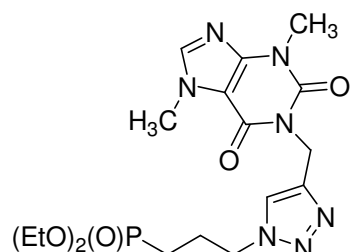

*Diethyl 3-{4-[(3,7-dimethyl-2,6-dioxopurin-1-yl)methyl]-1H-1,2,3-triazol-1-yl}propylphosphonate*

**22h.** White powder; m.p.: 175–176°C; IR (KBr):  $\nu = 3444, 3001, 2984, 1704, 1668, 1221, 1020 \text{ cm}^{-1}$ ;  $^1\text{H}$  NMR (600 MHz,  $\text{CDCl}_3$ ):  $\delta = 7.76$  (s, 1H); 7.53 (s, 1H,  $\text{HC5}'$ ); 5.35 (s, 2H,  $\text{CH}_2$ ); 4.42 (t,  $J = 7.0$  Hz, 2H,  $\text{PCCCH}_2$ ); 4.15–4.05 (m, 4H,  $2 \times \text{POCH}_2\text{CH}_3$ ); 4.02 (s, 3H,  $\text{CH}_3$ ); 3.60 (s, 3H,  $\text{CH}_3$ ); 2.22 (dqv,  $J = 14.2$  Hz,  $J = 7.0$  Hz, 2H,  $\text{PCCH}_2$ ); 1.74 (dt,  $J = 18.7$  Hz,  $J = 7.0$  Hz, 2H,  $\text{PCH}_2$ ); 1.34 (t,  $J = 7.0$  Hz, 6H,  $2 \times \text{POCH}_2\text{CH}_3$ );  $^{13}\text{C}$  NMR (151 MHz,  $\text{CDCl}_3$ ):  $\delta = 154.8$  (s,  $\text{C}=\text{O}$ ); 151.4 (s,  $\text{C}=\text{O}$ ); 148.9; 143.7; 141.6; 123.4; 107.7; 61.7 (d,  $J = 6.5$  Hz, POC); 50.0 (d,  $J = 16.1$  Hz, PCCC); 36.0; 33.6; 29.7; 23.6 (d,  $J = 4.5$  Hz, PCC); 22.7 (d,  $J = 143.1$  Hz, PC); 16.4 (d,  $J = 5.8$  Hz, POCC);  $^{31}\text{P}$  NMR (243 MHz,  $\text{CDCl}_3$ ):  $\delta = 30.03$  ppm. Anal. Calcd. for  $\text{C}_{17}\text{H}_{26}\text{N}_7\text{O}_5\text{P}$ : C, 46.47; H, 5.96; N, 22.31. Found: C, 46.33; H, 6.06; N, 22.51.

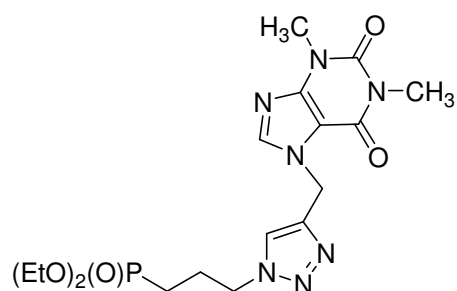

*Diethyl 3-{4-[(1,3-dimethyl-2,6-dioxopurin-7-yl)methyl]-1H-1,2,3-triazol-1-yl}propylphosphonate*

**22i.** White solid; m.p.: 187–190°C; IR (KBr):  $\nu = 3440, 2996, 2984, 1704, 1668, 1225, 1018 \text{ cm}^{-1}$ ;  $^1\text{H}$  NMR (600

MHz, CDCl<sub>3</sub>):  $\delta$  = 7.87 (s, 1H); 7.83 (s, 1H, HC5'); 5.61 (s, 2H, CH<sub>2</sub>); 4.46 (t,  $J$  = 7.0 Hz, 2H, PCCCH<sub>2</sub>); 4.16–4.05 (m, 4H, 2×POCH<sub>2</sub>CH<sub>3</sub>); 3.60 (s, 3H, CH<sub>3</sub>); 3.44 (s, 3H, CH<sub>3</sub>); 2.24 (dq,  $J$  = 14.6 Hz,  $J$  = 7.0 Hz, 2H, PCCH<sub>2</sub>); 1.74 (dt,  $J$  = 18.7 Hz,  $J$  = 7.0 Hz, 2H, PCH<sub>2</sub>); 1.34 (t,  $J$  = 7.0 Hz, 6H, 2×POCH<sub>2</sub>CH<sub>3</sub>); <sup>13</sup>C NMR (151 MHz, CDCl<sub>3</sub>):  $\delta$  = 155.4 (s, C=O); 151.5 (s, C=O); 149.0; 142.2; 141.4; 123.8; 106.4; 61.8 (d,  $J$  = 6.5 Hz, POC); 50.1 (d,  $J$  = 15.3 Hz, PCCC); 41.4; 29.7; 27.9; 23.6 (d,  $J$  = 4.8 Hz, PCC); 22.6 (d,  $J$  = 142.4 Hz, PC); 16.4 (d,  $J$  = 5.8 Hz, POCC); <sup>31</sup>P NMR (243 MHz, CDCl<sub>3</sub>):  $\delta$  = 29.75 ppm. Anal. Calcd. for C<sub>17</sub>H<sub>26</sub>N<sub>7</sub>O<sub>5</sub>P: C, 46.47; H, 5.96; N, 22.31. Found: C, 46.59; H, 6.11; N, 22.45.

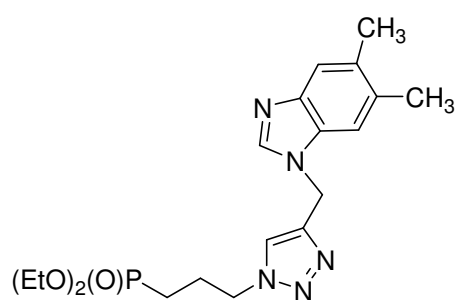

*Diethyl 3-{4-[(5,6-dimethylbenzimidazol-1-yl)methyl]-1H-1,2,3-triazol-1-yl}propylphosphonate* **22j**.

Colourless oil; IR (film):  $\nu$  = 3446, 2990, 2938, 1498, 1444, 1224, 1050, 965 cm<sup>-1</sup>; <sup>1</sup>H NMR (600 MHz, CDCl<sub>3</sub>):  $\delta$  = 8.33 (s, 1H); 7.61 (s, 1H,); 7.54 (s, 1H,); 7.32 (s, 1H,); 5.55 (s, 2H, CH<sub>2</sub>); 4.43 (t,  $J$  = 7.0 Hz, 2H, PCCCH<sub>2</sub>); 4.15–4.05 (m, 4H, 2×POCH<sub>2</sub>CH<sub>3</sub>); 2.41 (s, 3H, CH<sub>3</sub>); 2.40 (s, 3H, CH<sub>3</sub>); 2.21 (dq,  $J$  = 14.6 Hz,  $J$  = 7.0 Hz, 2H, PCCH<sub>2</sub>); 1.70 (dt,  $J$  = 19.2 Hz,  $J$  = 7.0 Hz, 2H, PCH<sub>2</sub>); 1.34 (t,  $J$  = 7.1 Hz, 6H, 2×POCH<sub>2</sub>CH<sub>3</sub>); <sup>13</sup>C NMR (151 MHz, CDCl<sub>3</sub>):  $\delta$  = 143.4; 142.3; 142.0; 132.4; 131.4; 122.4; 120.3; 109.9; 61.8 (d,  $J$  = 6.5 Hz, POC); 50.0 (d,  $J$  = 14.5 Hz, PCCC); 40.5; 23.5 (d,  $J$  = 4.5 Hz, PCC); 22.4 (d,  $J$  = 142.3 Hz, PC); 20.5; 20.1; 16.4 (d,  $J$  = 5.8 Hz, POCC); <sup>31</sup>P NMR (243 MHz, CDCl<sub>3</sub>):  $\delta$  = 29.68 ppm. Anal. Calcd. for C<sub>19</sub>H<sub>28</sub>N<sub>5</sub>O<sub>3</sub>P: C, 56.29; H, 6.96; N, 17.27. Found: C, 56.07; H, 7.14; N, 17.10.

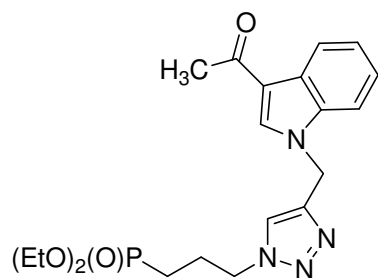

*Diethyl 3-{4-[(3-acetylidol-1-yl)methyl]-1H-1,2,3-triazol-1-yl}propylphosphonate* **22k**. Colourless oil; IR (film):  $\nu = 3394, 3110, 2941, 2825, 1648, 1229, 1029 \text{ cm}^{-1}$ ;  $^1\text{H NMR}$  (600 MHz,  $\text{CDCl}_3$ ):  $\delta = 8.43\text{--}8.38$  (m, 1H); 7.88 (s, 1H,  $\text{HC5}'$ ); 7.43–7.38 (m, 2H); 7.36–7.27 (m, 2H); 5.48 (s, 2H,  $\text{CH}_2$ ); 4.44 (t,  $J = 7.0 \text{ Hz}$ , 2H,  $\text{PCCCH}_2$ ); 4.10–4.01 (m, 4H,  $2 \times \text{POCH}_2\text{CH}_3$ ); 2.53 (s, 3H,  $\text{CH}_3$ ); 2.20 (dqv,  $J = 14.7 \text{ Hz}$ ,  $J = 7.0 \text{ Hz}$ , 2H,  $\text{PCCH}_2$ ); 1.65 (dt,  $J = 18.4 \text{ Hz}$ ,  $J = 7.0 \text{ Hz}$ , 2H,  $\text{PCH}_2$ ); 1.29 (t,  $J = 7.1 \text{ Hz}$ , 6H,  $2 \times \text{POCH}_2\text{CH}_3$ );  $^{13}\text{C NMR}$  (75.5 MHz,  $\text{CDCl}_3$ ):  $\delta = 192.9$  (s,  $\text{C}=\text{O}$ ); 142.9; 136.4; 134.7; 126.3; 123.5; 122.7; 122.6; 122.5; 117.5; 109.9; 61.9 (d,  $J = 6.3 \text{ Hz}$ ,  $\text{POC}$ ); 50.0 (d,  $J = 14.9 \text{ Hz}$ ,  $\text{PCCC}$ ); 42.4; 27.8; 23.6 (d,  $J = 4.9 \text{ Hz}$ ,  $\text{PCC}$ ); 22.1 (d,  $J = 142.8 \text{ Hz}$ ,  $\text{PC}$ ); 16.4 (d,  $J = 6.1 \text{ Hz}$ ,  $\text{POCC}$ );  $^{31}\text{P NMR}$  (121.5 MHz,  $\text{CDCl}_3$ ):  $\delta = 30.85 \text{ ppm}$ . Anal. Calcd. for  $\text{C}_{20}\text{H}_{27}\text{N}_4\text{O}_4\text{P}$ : C, 57.41; H, 6.50; N, 13.39. Found: C, 57.60; H, 6.73; N, 13.50.

## $^1\text{H NMR}$

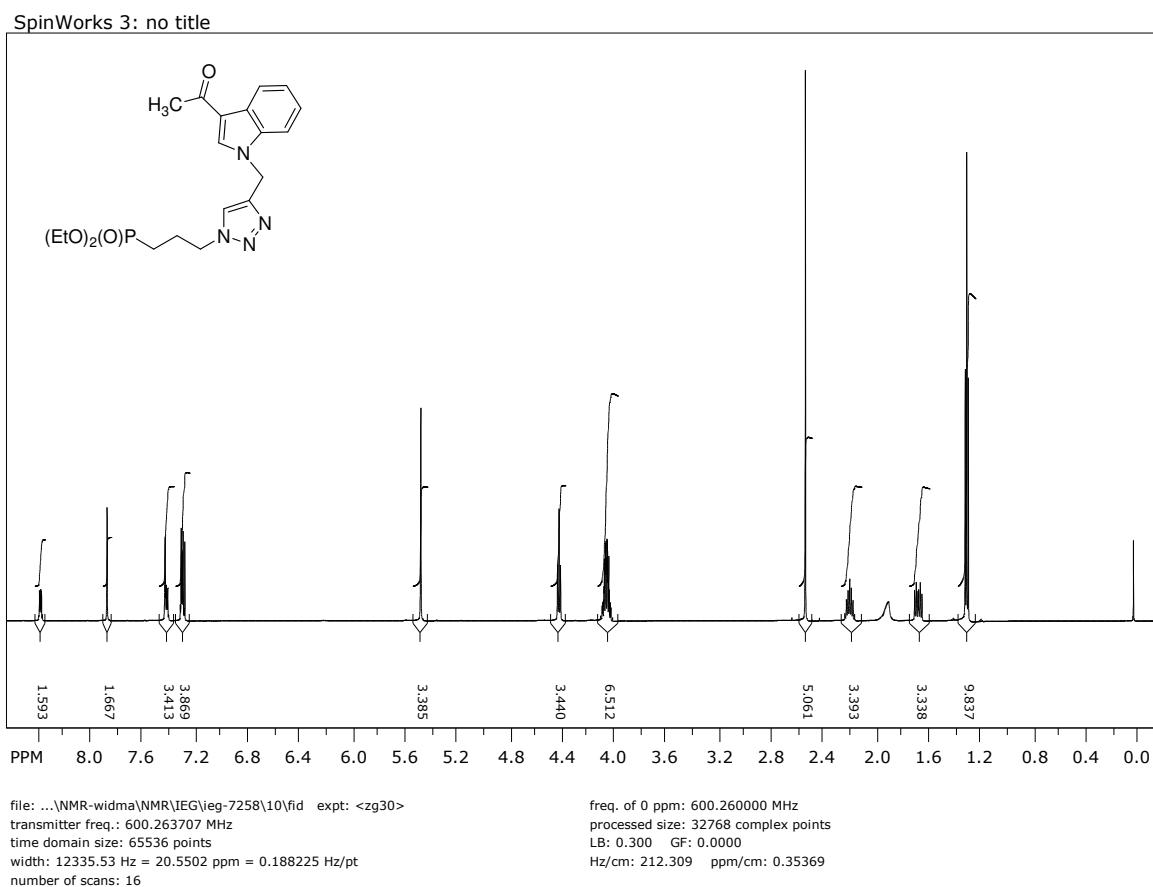

# <sup>13</sup>C NMR

SpinWorks 3: ieg6468C

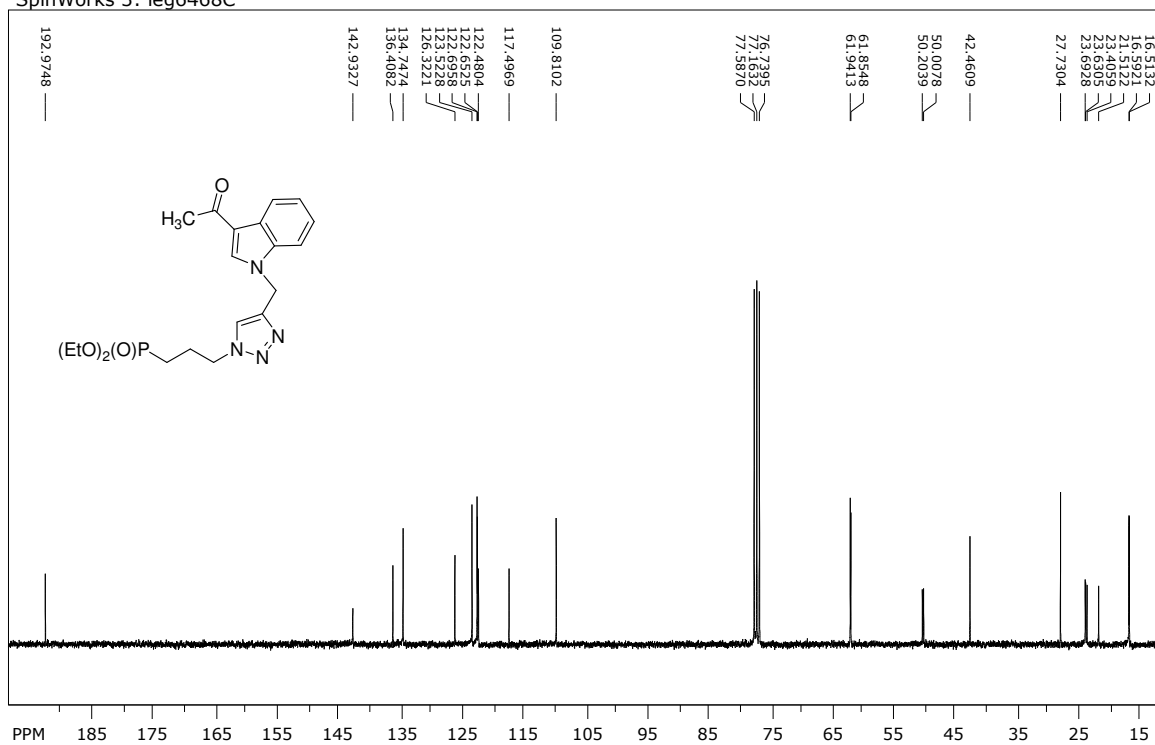

file: ...NMR-widma\NMR\IEG\ieg6468C.fid\fid block# 1 expt: "s2pul"  
transmitter freq.: 75.457729 MHz  
time domain size: 68096 points  
width: 18761.73 Hz = 248.6389 ppm = 0.275519 Hz/pt  
number of scans: 1024

freq. of 0 ppm: 75.450198 MHz  
processed size: 131072 complex points  
LB: 1.000 GF: 0.0000  
Hz/cm: 566.888 ppm/cm: 7.51266



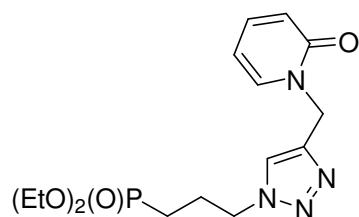

*Diethyl 3-[4-[(2-oxopyridin-1-yl)methyl]-1H-1,2,3-triazol-1-yl]propylphosphonate* **221**. Brown oil after; IR (film):  $\nu = 3426, 3144, 2986, 1657, 1226; 1026, 968 \text{ cm}^{-1}$ ;  $^1\text{H NMR}$  (300 MHz,  $\text{CDCl}_3$ ):  $\delta = 7.81(\text{s}, 1\text{H}, \text{HC5}')$ ;  $7.60(\text{ddd}, J = 6.8 \text{ Hz}, J = 2.1 \text{ Hz}, J = 0.7 \text{ Hz}, 1\text{H})$ ;  $7.32(\text{ddd}, J = 9.2 \text{ Hz}, J = 6.6 \text{ Hz}, J = 2.1 \text{ Hz}, 1\text{H})$ ;  $6.56(\text{ddd}, J = 9.2 \text{ Hz}, J = 1.3 \text{ Hz}, J = 0.7 \text{ Hz}, 1\text{H})$ ;  $6.20(\text{dt}, J = 6.8 \text{ Hz}, J = 1.3 \text{ Hz}, 1\text{H})$ ;  $5.19(\text{s}, 2\text{H}, \text{CH}_2)$ ;  $4.41(\text{t}, J = 7.1 \text{ Hz}, 2\text{H}, \text{PCCCH}_2)$ ;  $4.15\text{--}4.03(\text{m}, 4\text{H}, 2 \times \text{POCH}_2\text{CH}_3)$ ;  $2.22(\text{dqv}, J = 14.9 \text{ Hz}, J = 7.1 \text{ Hz}, 2\text{H}, \text{PCCH}_2)$ ;  $1.66(\text{dt}, J = 18.2 \text{ Hz}, J = 7.1 \text{ Hz}, 2\text{H}, \text{PCH}_2)$ ;  $1.34(\text{t}, J = 6.9 \text{ Hz}, 3\text{H}, \text{POCH}_2\text{CH}_3)$ ;  $1.33(\text{t}, J = 6.9 \text{ Hz}, 3\text{H}, \text{POCH}_2\text{CH}_3)$ ;  $^{13}\text{C NMR}$  (75.5 MHz,  $\text{CDCl}_3$ ):  $\delta = 162.1(\text{s}, \text{C=O})$ ;  $142.5(\text{s}, \text{HC=C})$ ;  $139.9$ ;  $137.6$ ;  $124.0(\text{s}, \text{HC=C})$ ;  $120.4$ ;  $106.4$ ;  $61.8(\text{d}, J = 6.4 \text{ Hz}, \text{POC})$ ;  $50.0(\text{d}, J = 16.1 \text{ Hz}, \text{PCCC})$ ;  $44.5$ ;  $23.5(\text{d}, J = 4.4 \text{ Hz}, \text{PCC})$ ;  $22.1(\text{d}, J = 147.1 \text{ Hz}, \text{PC})$ ;  $16.4(\text{d}, J = 6.0 \text{ Hz}, \text{POCC})$ ;  $^{31}\text{P NMR}$  (121.5 MHz,  $\text{CDCl}_3$ ):  $\delta = 31.05 \text{ ppm}$ . Anal. Calcd. for  $\text{C}_{15}\text{H}_{23}\text{N}_4\text{O}_4\text{P}$ : C, 50.84; H, 6.54; N, 15.81. Found: C, 50.61; H, 6.39; N, 15.64.

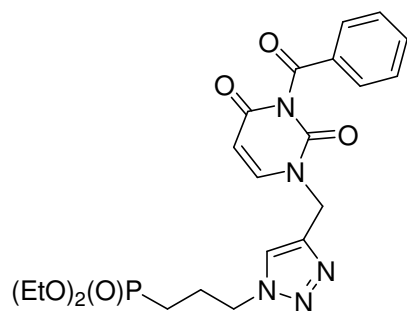

*Diethyl 3-(4-([3-benzoyl--2,4-dioxypyrimidin-1-yl]methyl)-1H-1,2,3-triazol-1-yl)propylphosphonate* **22m**.

Colourless oil; IR (film):  $\nu = 3020, 3005, 2963, 2899, 1669, 1664, 1220, 1020, 772, 689 \text{ cm}^{-1}$ ;  $^1\text{H NMR}$  (300 MHz,  $\text{CDCl}_3$ ):  $\delta = 7.94\text{--}7.90$  (m, 2H,  $2\times o\text{-CH}$ ); 7.71 (s, 1H,  $\text{HC}5'$ ); 7.69–7.63 (m, 1H,  $p\text{-CH}$ ); 7.64 (d,  $J = 8.0 \text{ Hz}$ , 1H,  $\text{HC}=\text{CH}$ ); 7.53–7.47 (m, 2H,  $2\times m\text{-CH}$ ); 5.84 (d,  $J = 8.0 \text{ Hz}$ , 1H,  $\text{HC}=\text{CH}$ ); 5.02 (s, 2H,  $\text{CH}_2$ ); 4.46 (t,  $J = 7.3 \text{ Hz}$ , 2H,  $\text{PCCCH}_2$ ); 4.18–4.01 (m, 4H,  $2\times \text{POCH}_2\text{CH}_3$ ); 2.23 (dqv,  $J = 14.7 \text{ Hz}$ ,  $J = 7.3 \text{ Hz}$ , 2H,  $\text{PCCCH}_2$ ); 1.73 (dt,  $J = 18.7 \text{ Hz}$ ,  $J = 7.3 \text{ Hz}$ , 2H,  $\text{PCH}_2$ ); 1.31 (t,  $J = 7.1 \text{ Hz}$ , 6H,  $2\times \text{POCH}_2\text{CH}_3$ );  $^{13}\text{C NMR}$  (75.5 MHz,  $\text{CDCl}_3$ ):  $\delta = 168.7$  (s,  $\text{C}=\text{O}$ ); 162.2 (s,  $\text{C}=\text{O}$ ); 149.7; 144.2 (s,  $\text{C}=\text{O}$ ); 141.3 (s,  $\text{HC}=\text{C}$ ); 135.2; 131.3; 130.4; 129.2; 124.1 (s,  $\text{HC}=\text{C}$ ); 102.5; 61.9 (d,  $J = 6.6 \text{ Hz}$ ,  $\text{POC}$ ); 50.2 (d,  $J = 15.4 \text{ Hz}$ ,  $\text{PCCC}$ ); 43.5; 23.7 (d,  $J = 4.7 \text{ Hz}$ ,  $\text{PCC}$ ); 22.7 (d,  $J = 143.0 \text{ Hz}$ ,  $\text{PC}$ ); 16.6 (d,  $J = 6.0 \text{ Hz}$ ,  $\text{POCC}$ );  $^{31}\text{P NMR}$  (121 MHz,  $\text{CDCl}_3$ ):  $\delta = 30.12 \text{ ppm}$ .  
 Anal. Calcd. for  $\text{C}_{21}\text{H}_{26}\text{N}_5\text{O}_6\text{P}$ : C, 53.05; H, 5.51; N, 14.73. Found: C, 52.89; H, 5.33; N, 14.58.

$^1\text{H NMR}$

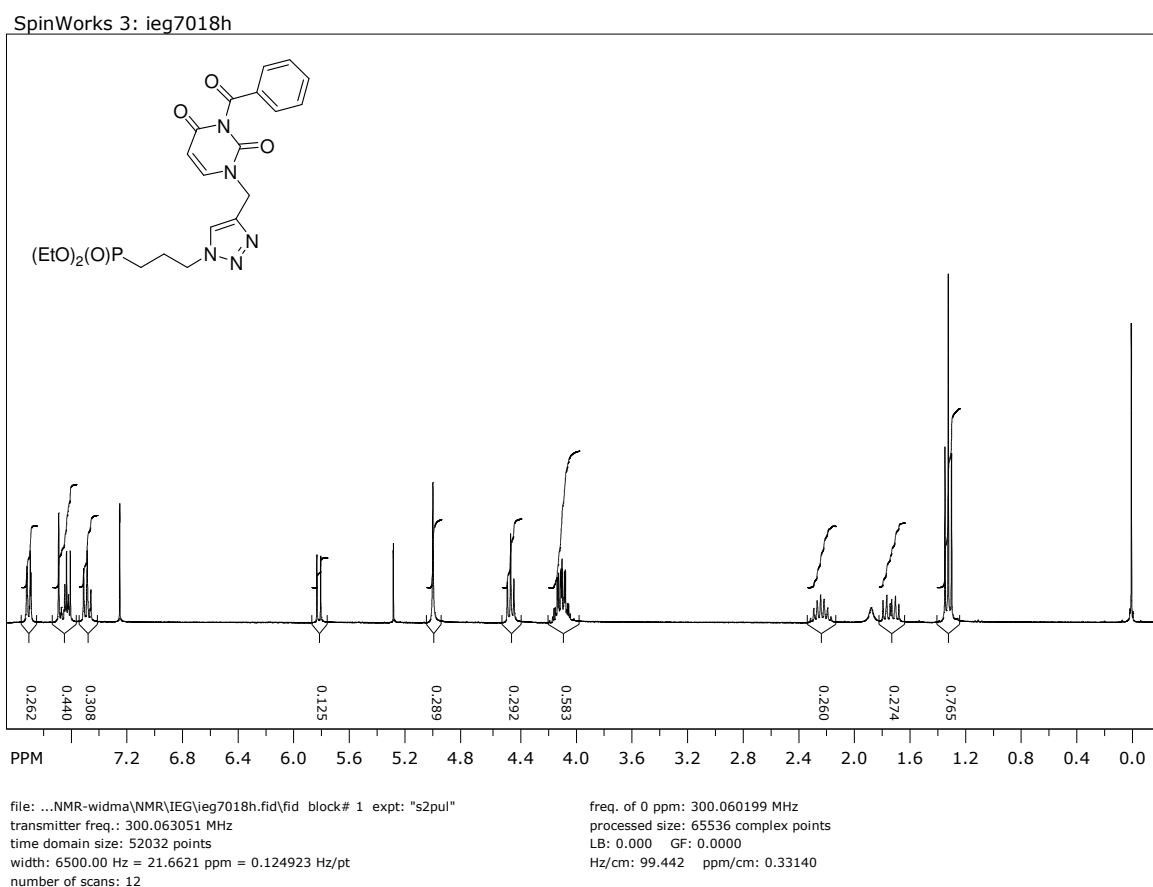

# <sup>13</sup>C NMR

SpinWorks 3: ieg7018C

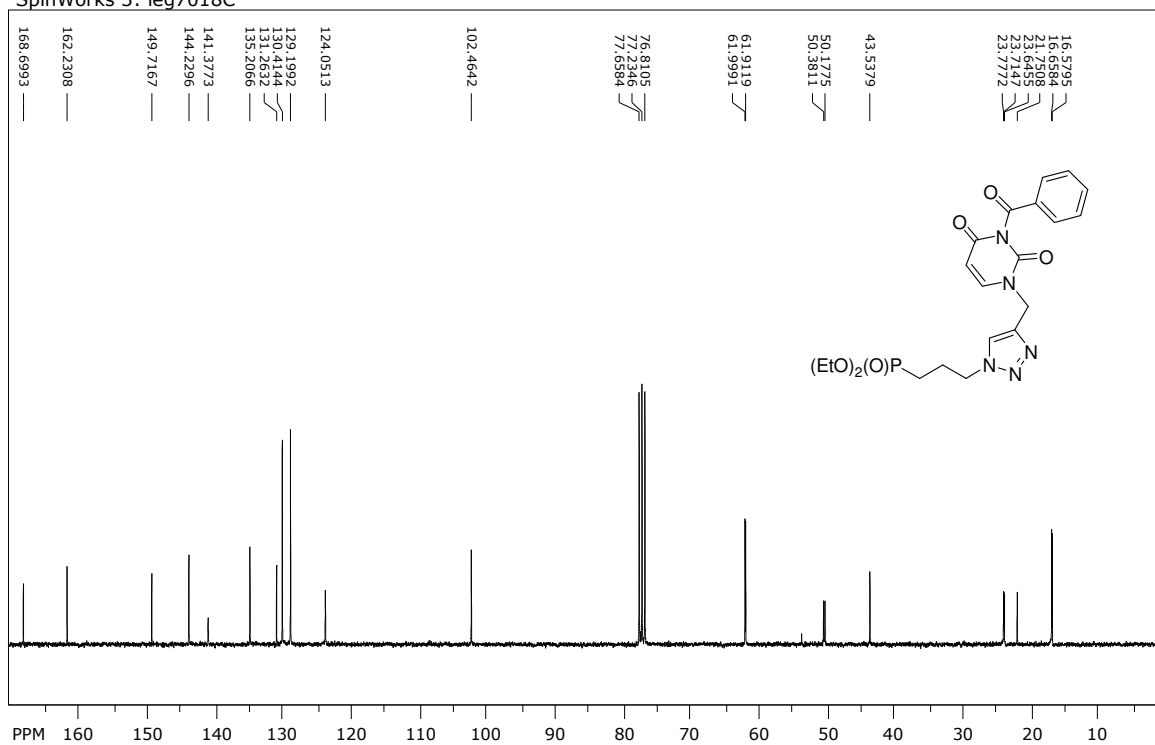

file: ...NMR-widma\NMR\IEG\ieg7018C.fid\fid block# 1 expt: "s2pul"  
transmitter freq.: 75.457729 MHz  
time domain size: 68096 points  
width: 18761.73 Hz = 248.6389 ppm = 0.275519 Hz/pt  
number of scans: 1168

freq. of 0 ppm: 75.450194 MHz  
processed size: 131072 complex points  
LB: 1.000 GF: 0.0000  
Hz/cm: 514.864 ppm/cm: 6.82321

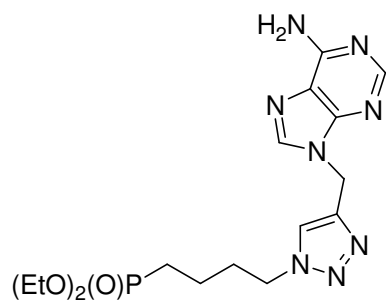

*Diethyl 4-(4-([6-aminopurin-9-yl]methyl)-1H-1,2,3-triazol-1-yl)butylphosphonate 23a.*

White powder; m.p.: 119–120°C; IR (KBr):  $\nu = 3462, 3306, 3140, 2984, 2912, 2870, 1662, 1597, 1244, 1033 \text{ cm}^{-1}$ ;  $^1\text{H}$  NMR (600 MHz,  $\text{CDCl}_3$ ):  $\delta = 8.41$  (s, 1H); 8.02 (s, 1H); 7.68 (s, 1H); 5.59 (brs, 2H,  $\text{NH}_2$ ); 5.51 (s, 2H,  $\text{CH}_2$ ); 4.36 (t,  $J = 7.1 \text{ Hz}$ , 2H,  $\text{PCCCCCH}_2$ ); 4.14–4.04 (m, 4H,  $2 \times \text{POCH}_2\text{CH}_3$ ); 2.03 (qv,  $J = 7.1 \text{ Hz}$ , 2H,  $\text{PCCCH}_2$ ); 1.80–1.73 (m, 2H,  $\text{PCH}_2$ ); 1.65 (dqv,  $J = 14.1 \text{ Hz}$ ,  $J = 7.1 \text{ Hz}$ , 2H,  $\text{PCCCH}_2$ ); 1.32 (t,  $J = 7.0 \text{ Hz}$ , 6H,  $2 \times \text{POCH}_2\text{CH}_3$ );  $^{13}\text{C}$  NMR (151 MHz,  $\text{CDCl}_3$ ):  $\delta = 155.6; 153.1; 149.8; 142.4; 140.4; 122.8; 119.5; 61.6$  (d,  $J = 6.6 \text{ Hz}$ , POC); 49.9; 38.6; 30.6 (d,  $J = 15.1 \text{ Hz}$ , PCCC); 24.9 (d,  $J = 142.1 \text{ Hz}$ , PC); 19.6 (d,  $J = 5.0 \text{ Hz}$ , PCC); 16.4 (d,  $J = 6.2 \text{ Hz}$ , POCC);  $^{31}\text{P}$  NMR (243 MHz,  $\text{CDCl}_3$ ):  $\delta = 30.73 \text{ ppm}$ . Anal. Calcd. for  $\text{C}_{16}\text{H}_{25}\text{N}_8\text{O}_3\text{P}$ : C, 47.06; H, 6.17; N, 27.44. Found: C, 46.88; H, 6.02; N, 27.29.

$^1\text{H}$  NMR

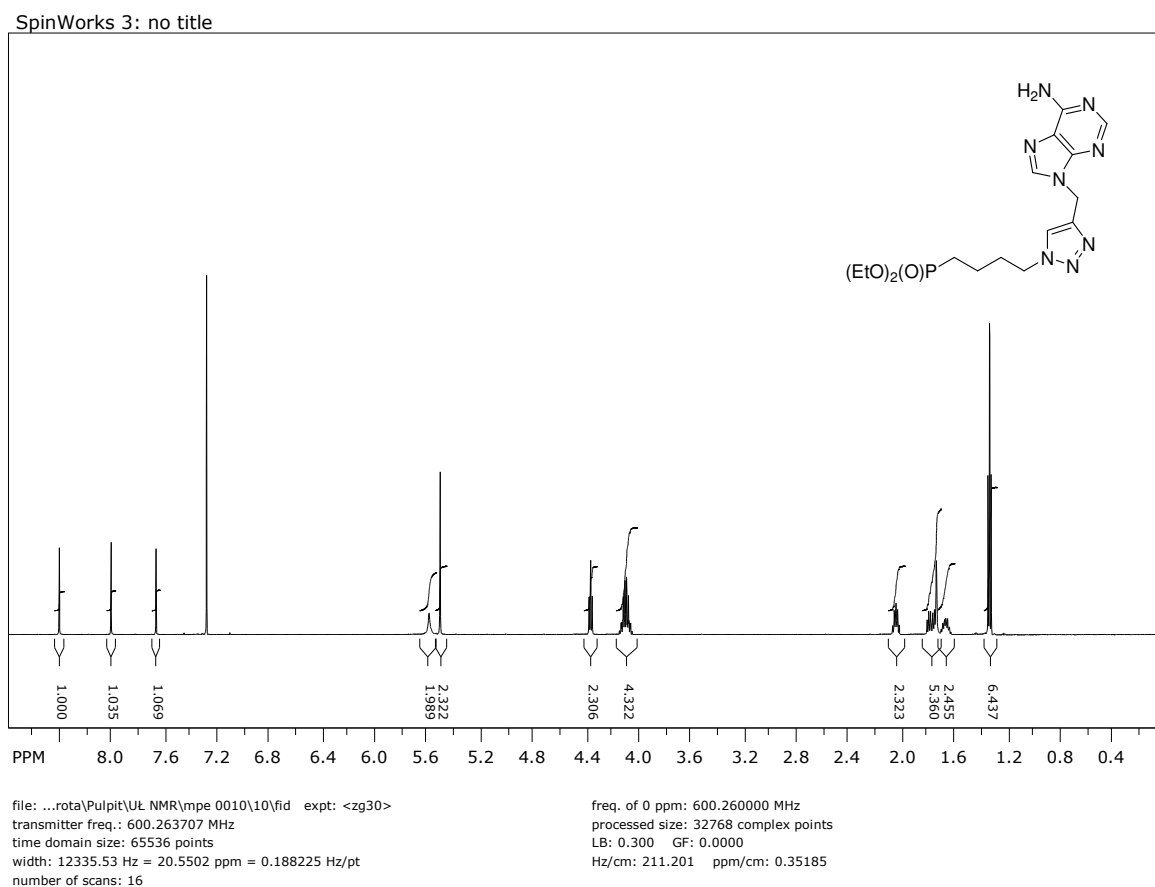

# <sup>13</sup>C NMR

SpinWorks 3: no title

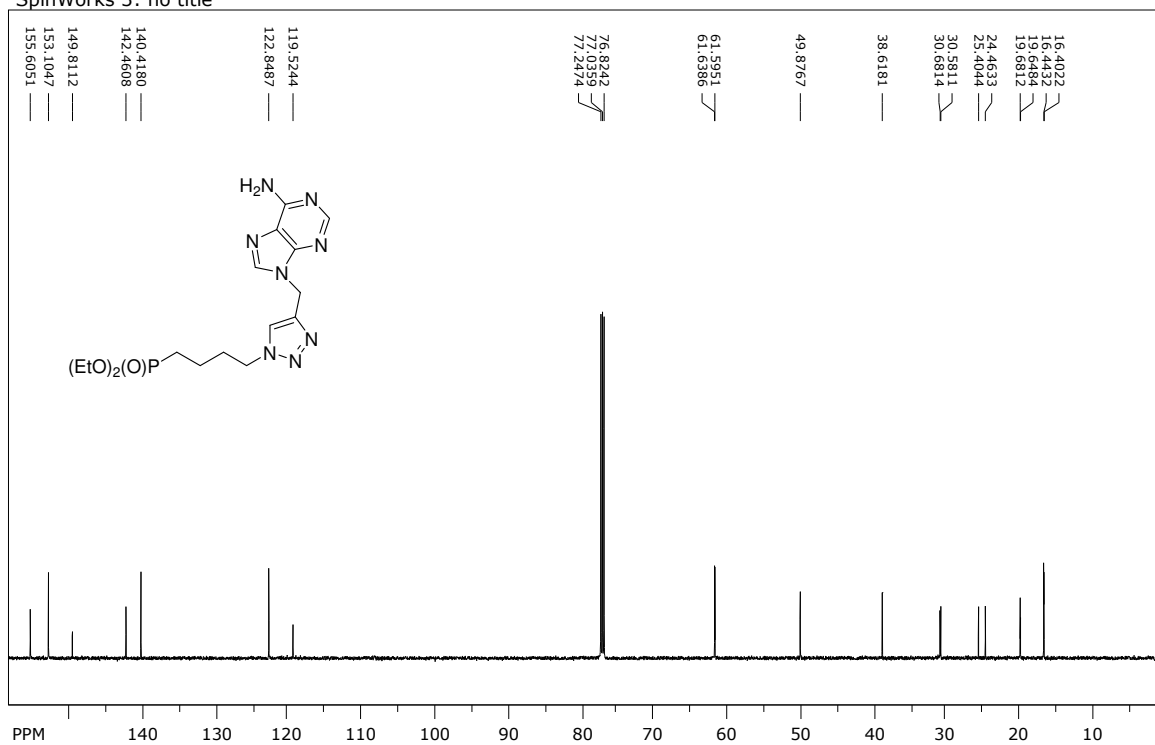

file: ...rota\Pulpit\WŁ NMR\mpe 0016\10\fid exp: <zpgg30>  
transmitter freq.: 150.950591 MHz  
time domain size: 65536 points  
width: 36057.69 Hz = 238.8708 ppm = 0.550197 Hz/pt  
number of scans: 526

freq. of 0 ppm: 150.935497 MHz  
processed size: 32768 complex points  
LB: 1.000 GF: 0.0000  
Hz/cm: 956.466 ppm/cm: 6.33629

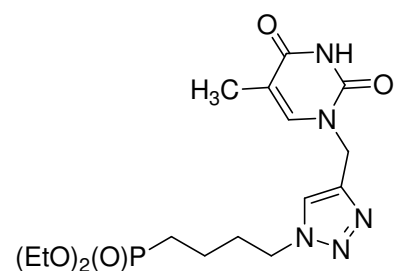

*Diethyl 4-(4-([5-methyl-2,4-dioxypyrimidin-1-yl]methyl)-1H-1,2,3-triazol-1-yl)butylphosphonate* **23b**. White powder; m.p.: 63–65°C; IR (KBr):  $\nu = 3425, 3132, 2986, 2912, 2827, 1688, 1219, 1027 \text{ cm}^{-1}$ ;  $^1\text{H NMR}$  (600 MHz,  $\text{CDCl}_3$ ):  $\delta = 8.69$  (brs, 1H, NH); 7.72 (s, 1H,  $\text{HC}5'$ ); 7.36 (d,  $J = 1.0 \text{ Hz}$ , 1H,  $\text{HC}=\text{CCH}_3$ ); 4.97 (s, 2H,  $\text{CH}_2$ ); 4.38 (t,  $J = 7.1 \text{ Hz}$ , 2H,  $\text{PCCCCH}_2$ ); 4.16–4.06 (m, 4H,  $2 \times \text{POCH}_2\text{CH}_3$ ); 2.06 (qv,  $J = 7.1 \text{ Hz}$ , 2H,  $\text{PCCCH}_2$ ); 1.93 (d,  $J = 1.0 \text{ Hz}$ , 3H,  $\text{HC}=\text{CCH}_3$ ); 1.78 (dt,  $J = 15.7 \text{ Hz}$ ,  $J = 7.1 \text{ Hz}$ , 2H,  $\text{PCH}_2$ ); 1.69–1.64 (m, 2H,  $\text{PCCCH}_2$ ); 1.33 (t,  $J = 7.0 \text{ Hz}$ , 6H,  $2 \times \text{POCH}_2\text{CH}_3$ );  $^{13}\text{C NMR}$  (151 MHz,  $\text{CDCl}_3$ ):  $\delta = 164.2$  (s,  $\text{C}=\text{O}$ ); 151.2 (s,  $\text{C}=\text{O}$ ); 142.1; 140.2; 123.7; 111.3; 61.6 (d,  $J = 6.6 \text{ Hz}$ ,  $\text{POC}$ ); 49.9; 43.0; 30.6 (d,  $J = 15.2 \text{ Hz}$ ,  $\text{PCCC}$ ); 24.9 (d,  $J = 142.0 \text{ Hz}$ ,  $\text{PC}$ ); 19.7 (d,  $J = 5.2 \text{ Hz}$ ,  $\text{PCC}$ ); 16.4 (d,  $J = 6.2 \text{ Hz}$ ,  $\text{POCC}$ ); 12.2 (s,  $\text{CH}_3$ );  $^{31}\text{P NMR}$  (243 MHz,  $\text{CDCl}_3$ ):  $\delta = 30.84 \text{ ppm}$ . Anal. Calcd. for  $\text{C}_{16}\text{H}_{26}\text{N}_5\text{O}_5\text{P}$ : C, 48.12; H, 6.56; N, 17.54. Found: C, 47.90; H, 6.33; N, 17.41.

## $^1\text{H NMR}$

SpinWorks 3: no title

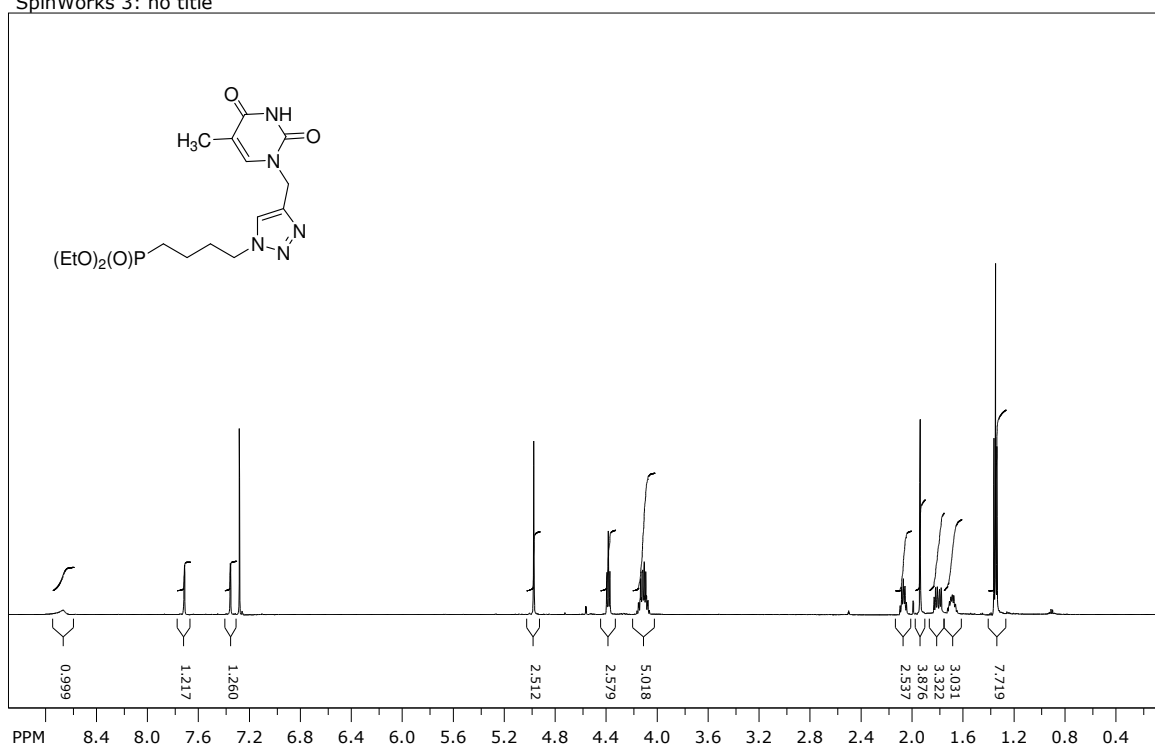

file: ...rota\Pulpit\U\ NMR\mpe 0012\10\fid exp: <zg30>  
 transmitter freq.: 600.263707 MHz  
 time domain size: 65536 points  
 width: 12335.53 Hz = 20.5502 ppm = 0.188225 Hz/pt  
 number of scans: 16

freq. of 0 ppm: 600.260000 MHz  
 processed size: 32768 complex points  
 LB: 0.300 GF: 0.0000  
 Hz/cm: 218.265 ppm/cm: 0.36362

# <sup>13</sup>C NMR

SpinWorks 3: no title

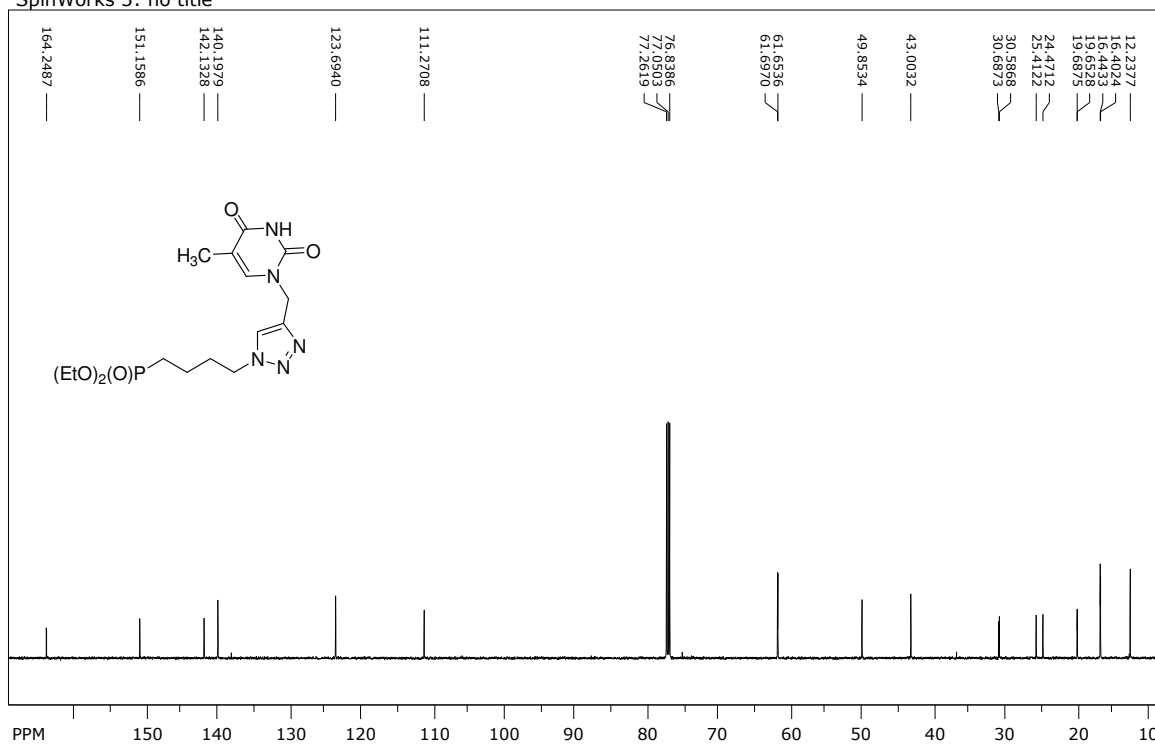

file: ...rota\Pulpit\WŁ NMR\mpe 0015\10\fid exp: <zpgg30>  
transmitter freq.: 150.950591 MHz  
time domain size: 65536 points  
width: 36057.69 Hz = 238.8708 ppm = 0.550197 Hz/pt  
number of scans: 526

freq. of 0 ppm: 150.935497 MHz  
processed size: 32768 complex points  
LB: 1.000 GF: 0.0000  
Hz/cm: 977.117 ppm/cm: 6.47309

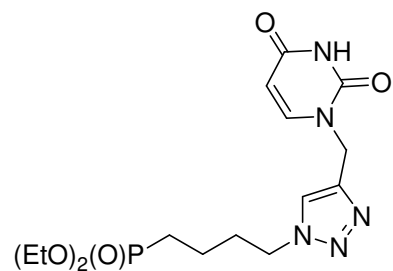

*Diethyl 4-(4-([2,4-dioxypyrimidin-1-yl]methyl)-1H-1,2,3-triazol-1-yl)butylphosphonate* **23c**. White powder; m.p.: 124–125°C; IR (KBr):  $\nu = 3435, 3142, 2994, 2952, 2867, 1648, 1229, 1023 \text{ cm}^{-1}$ ;  $^1\text{H NMR}$  (600 MHz,  $\text{CDCl}_3$ ):  $\delta = 8.80$  (brs, 1H, NH); 7.72 (s, 1H,  $\text{HC}5'$ ); 7.53 (d,  $J = 8.0 \text{ Hz}$ , 1H,  $\text{HC}=\text{CH}$ ); 5.73 (d,  $J = 8.0 \text{ Hz}$ , 1H,  $\text{HC}=\text{CH}$ ); 5.00 (s, 2H,  $\text{CH}_2$ ); 4.39 (t,  $J = 7.1 \text{ Hz}$ , 2H,  $\text{PCCCCCH}_2$ ); 4.16–4.06 (m, 4H,  $2 \times \text{POCH}_2\text{CH}_3$ ); 2.06 (qv,  $J = 7.1 \text{ Hz}$ , 2H,  $\text{PCCCCH}_2$ ); 1.82–1.76 (m, 2H,  $\text{PCCH}_2$ ); 1.71–1.64 (dqv,  $J = 14.3 \text{ Hz}$ ,  $J = 7.1 \text{ Hz}$ , 2H,  $\text{PCH}_2$ ); 1.34 (t,  $J = 7.0 \text{ Hz}$ , 6H,  $2 \times \text{POCH}_2\text{CH}_3$ );  $^{13}\text{C NMR}$  (151 MHz,  $\text{CDCl}_3$ ):  $\delta = 163.7$  (s,  $\text{C}=\text{O}$ ); 151.1 (s,  $\text{C}=\text{O}$ ); 144.3; 141.9; 123.7; 102.7; 61.6 (d,  $J = 6.6 \text{ Hz}$ ,  $\text{POC}$ ); 49.9; 43.2; 30.6 (d,  $J = 15.2 \text{ Hz}$ ,  $\text{PCCC}$ ); 25.0 (d,  $J = 142.0 \text{ Hz}$ ,  $\text{PC}$ ); 19.7 (d,  $J = 5.3 \text{ Hz}$ ,  $\text{PCC}$ ); 16.5 (d,  $J = 6.0 \text{ Hz}$ ,  $\text{POCC}$ );  $^{31}\text{P NMR}$  (243 MHz,  $\text{CDCl}_3$ ):  $\delta = 30.77 \text{ ppm}$ . Anal. Calcd. for  $\text{C}_{15}\text{H}_{24}\text{N}_5\text{O}_5\text{P}$ : C, 46.75; H, 6.28; N, 18.17. Found: C, 46.84; H, 6.36; N, 18.00.

## $^1\text{H NMR}$

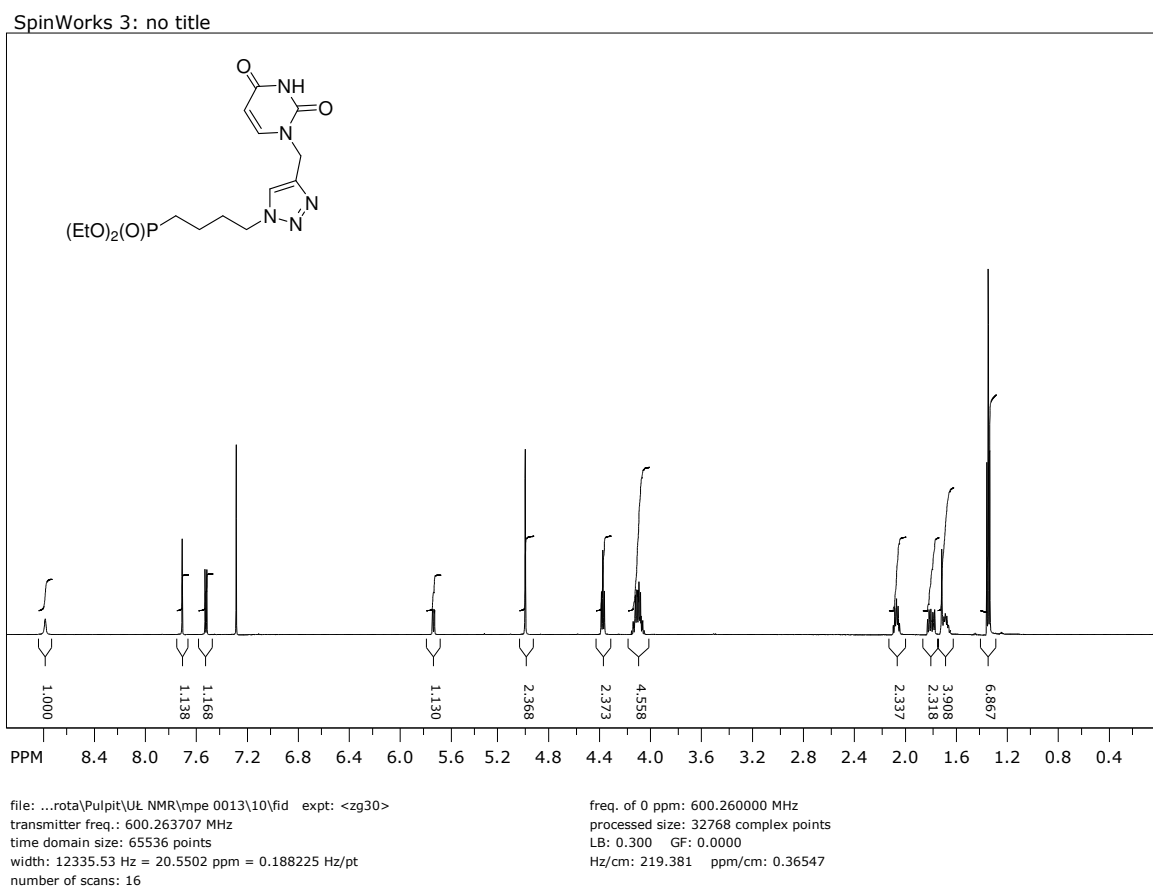



# <sup>13</sup>C NMR

SpinWorks 3: no title

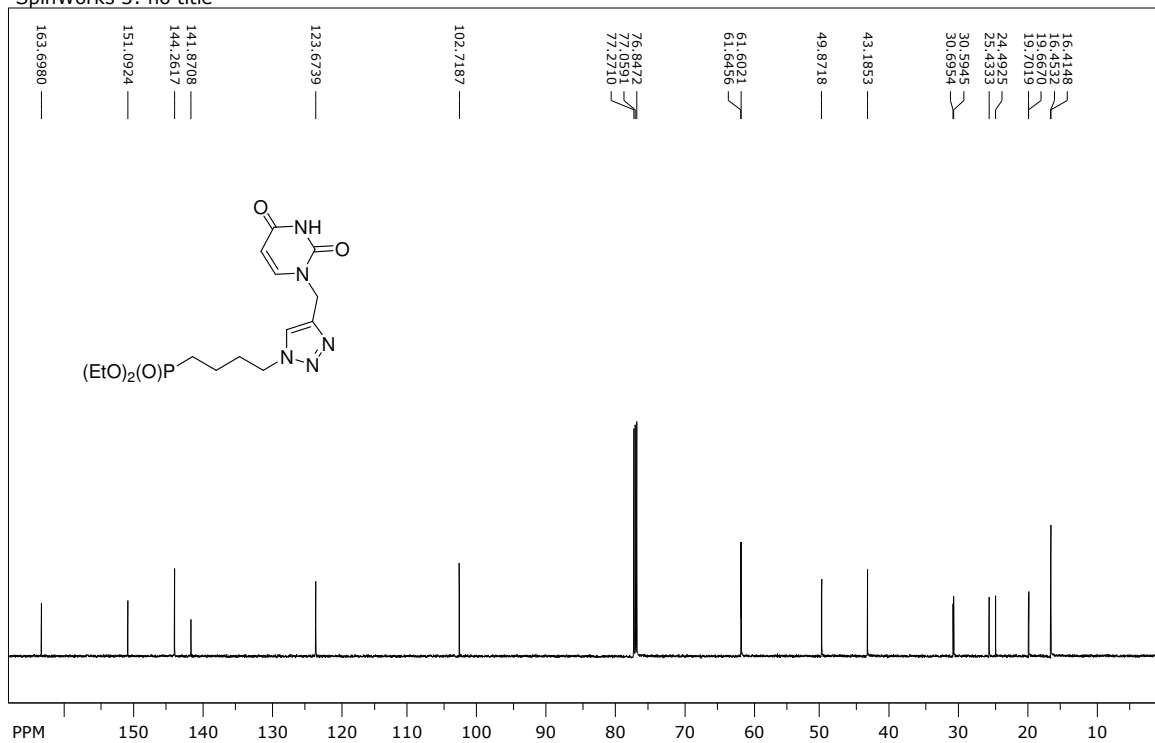

file: ...rota\Pulpit\WŁ NMR\mpe 0017\10\fid exp: <zpgg30>  
transmitter freq.: 150.950591 MHz  
time domain size: 65536 points  
width: 36057.69 Hz = 238.8708 ppm = 0.550197 Hz/pt  
number of scans: 526

freq. of 0 ppm: 150.935497 MHz  
processed size: 32768 complex points  
LB: 1.000 GF: 0.0000  
Hz/cm: 1016.245 ppm/cm: 6.73231

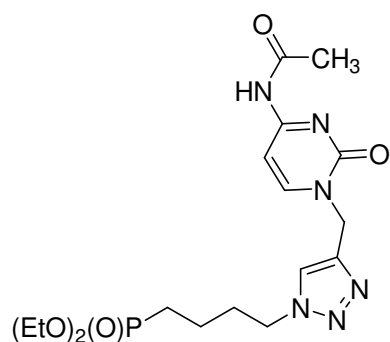

*Diethyl 4-(4-([N<sup>4</sup>-acetylamino-2-oxopyrimidin-1-yl]methyl)-1H-1,2,3-triazol-1-yl)butylphosphonate* **23d**. White powder; m.p.: 159–161°C; IR (KBr):  $\nu = 3217, 3133, 3084, 2982, 1707, 1650, 1217, 1025 \text{ cm}^{-1}$ ;  $^1\text{H NMR}$  (600 MHz,  $\text{CDCl}_3$ ):  $\delta = 8.83$  (brs, 1H, NH); 7.96 (d,  $J = 7.3$  Hz, 1H,  $\text{HC}=\text{CH}$ ); 7.84 (s, 1H,  $\text{HC}5'$ ); 7.40 (d,  $J = 7.3$  Hz, 1H,  $\text{HC}=\text{CH}$ ); 5.16 (s, 2H,  $\text{CH}_2$ ); 4.37 (t,  $J = 7.1$  Hz, 2H,  $\text{PCCCCCH}_2$ ); 4.16–4.04 (m, 4H,  $2 \times \text{POCH}_2\text{CH}_3$ ); 2.25 (s, 3H,  $\text{CH}_3$ ); 2.05 (qv,  $J = 7.1$  Hz, 2H,  $\text{PCCCCH}_2$ ); 1.79 (dt,  $J = 15.5$  Hz,  $J = 7.1$  Hz, 2H,  $\text{PCH}_2$ ); 1.71–1.63 (m, 2H,  $\text{PCCH}_2$ ); 1.33 (t,  $J = 7.0$  Hz, 6H,  $2 \times \text{POCH}_2\text{CH}_3$ );  $^{13}\text{C NMR}$  (151 MHz,  $\text{CD}_3\text{OD}$ ):  $\delta = 171.5; 163.1; 157.0; 149.4; 142.1; 124.1; 96.9; 61.8$  (d,  $J = 6.6$  Hz, POC); 49.3; 44.9; 30.2 (d,  $J = 16.2$  Hz, PCCC); 23.7 (d,  $J = 140.4$  Hz, PC); 23.2; 19.1 (d,  $J = 5.2$  Hz, POCC); 15.4;  $^{31}\text{P NMR}$  (243 MHz,  $\text{CDCl}_3$ ):  $\delta = 30.90$  ppm. Anal. Calcd. for  $\text{C}_{17}\text{H}_{27}\text{N}_6\text{O}_5\text{P}$ : C, 47.88; H, 6.38; N, 19.71. Found: C, 48.03; H, 6.22; N, 19.75.

## $^1\text{H NMR}$

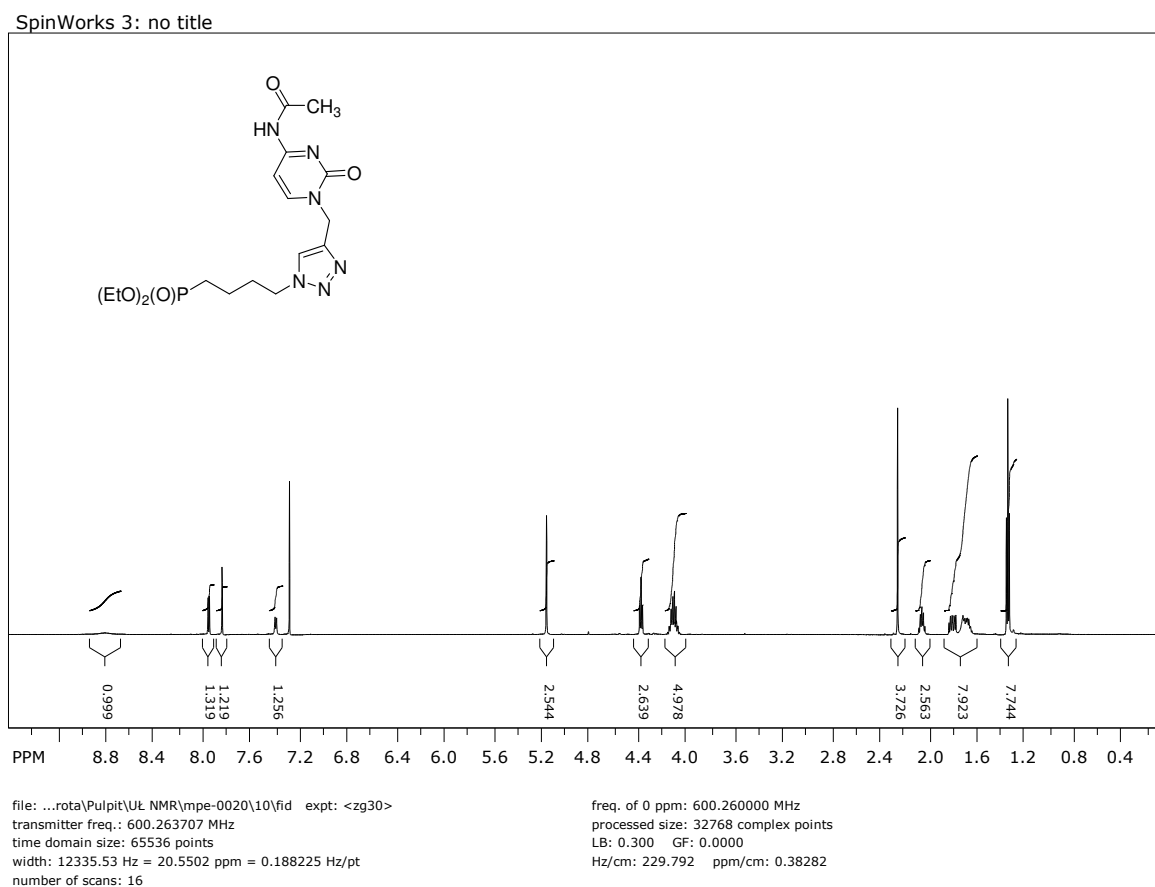

## $^{13}\text{C NMR}$

SpinWorks 3: no title

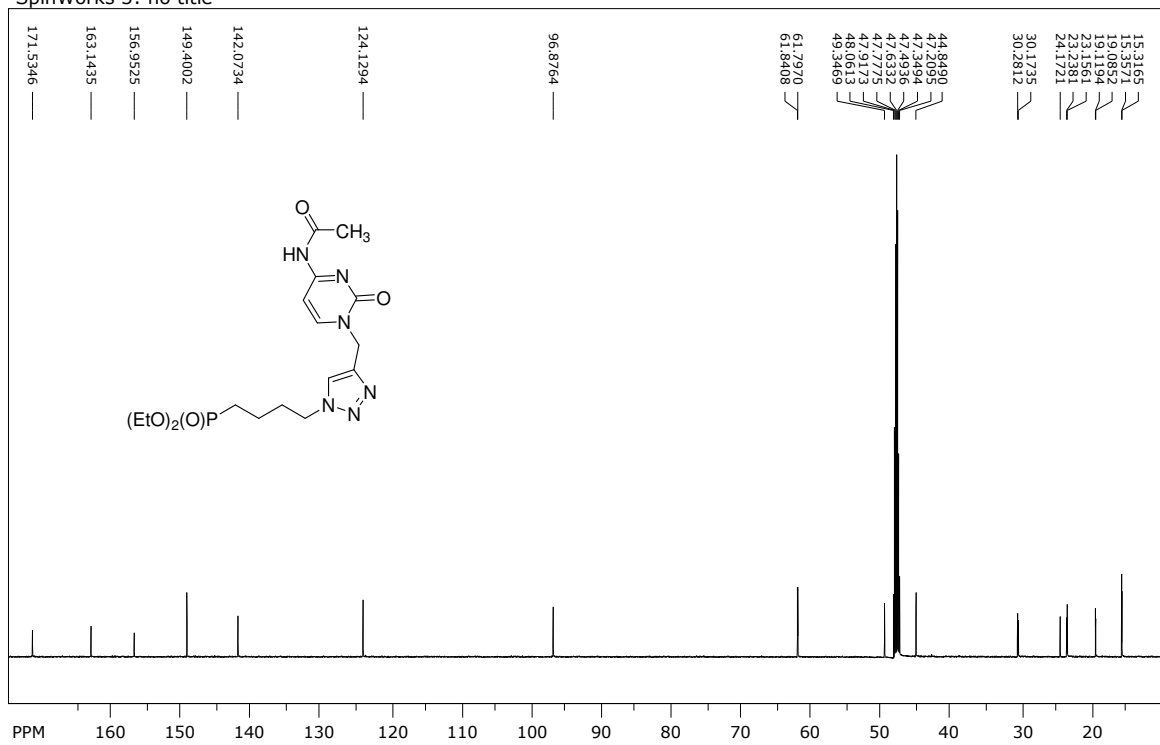

file: ...rota\Pulpit\U\ NMR\ieg6157\10\fid exp: <zpgp30>  
 transmitter freq.: 150.950591 MHz  
 time domain size: 65536 points  
 width: 36057.69 Hz = 238.8708 ppm = 0.550197 Hz/pt  
 number of scans: 512

freq. of 0 ppm: 150.935497 MHz  
 processed size: 32768 complex points  
 LB: 1.000 GF: 0.0000  
 Hz/cm: 998.855 ppm/cm: 6.61710

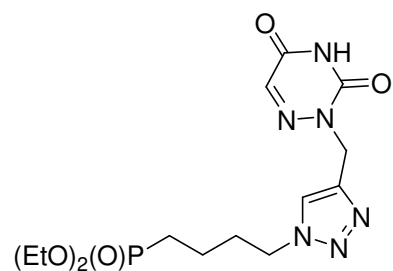

*Diethyl 4-[4-[(3,5-dioxo-1,2,4-triazin-2-yl)methyl]-1H-1,2,3-triazol-1-yl]butylphosphonate 23f.* Colourless oil; IR (film):  $\nu = 3439, 3231, 3141, 3012, 2909, 1730, 1676, 1216, 1027, 754 \text{ cm}^{-1}$ ;  $^1\text{H NMR}$  (300 MHz,  $\text{CDCl}_3$ ):  $\delta = 11.58$  (brs, 1H, NH); 7.70 (s, 1H,  $\text{HC}5'$ ); 7.39 (s, 1H,  $\text{HC}=\text{N}$ ); 5.20 (s, 2H,  $\text{CH}_2$ ); 4.33 (t,  $J = 7.2 \text{ Hz}$ , 2H,  $\text{PCCCCCH}_2$ ); 4.15–4.03 (m, 4H,  $2 \times \text{POCH}_2\text{CH}_3$ ); 2.01 (qv,  $J = 7.1 \text{ Hz}$ , 2H,  $\text{PCCCH}_2$ ); 1.83–1.56 (m, 4H,  $\text{PCH}_2\text{CH}_2$ ); 1.31 (t,  $J = 7.0 \text{ Hz}$ , 6H,  $2 \times \text{POCH}_2\text{CH}_3$ );  $^{13}\text{C NMR}$  (75.5 MHz,  $\text{CDCl}_3$ ):  $\delta = 155.9$  (s,  $\text{C}=\text{O}$ ); 148.9 (s,  $\text{C}=\text{O}$ ); 141.5; 134.6; 123.8; 61.8 (d,  $J = 6.6 \text{ Hz}$ , POC); 49.7; 34.5; 30.6 (d,  $J = 15.5 \text{ Hz}$ , PCCC); 24.7 (d,  $J = 141.4 \text{ Hz}$ , PC); 19.5 (d,  $J = 4.9 \text{ Hz}$ , PCC); 16.4 (d,  $J = 6.1 \text{ Hz}$ , POCC);  $^{31}\text{P NMR}$  (121.5 MHz,  $\text{CDCl}_3$ ):  $\delta = 32.44$  ppm. Anal. Calcd. for  $\text{C}_{14}\text{H}_{23}\text{N}_6\text{O}_5\text{P}$ : C, 43.52; H, 6.00; N, 21.75. Found: C, 43.65; H, 5.87; N, 21.69.

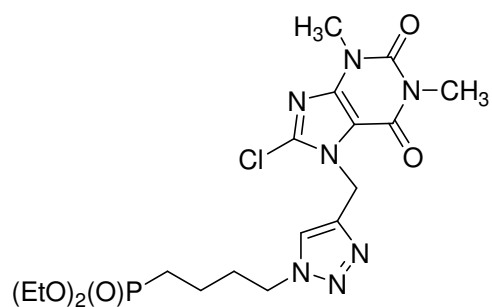

*Diethyl 4-{4-[(8-chloro-1,3-dimethyl-2,6-dioxopurin-7-yl)methyl]-1H-1,2,3-triazol-1-yl}butylphosphonate*

**23g.** White solid; m.p.: 69–70°C; IR (KBr):  $\nu = 3013, 2988, 2962, 1707, 1668, 1225, 1015 \text{ cm}^{-1}$ ;  $^1\text{H NMR}$  (600 MHz,  $\text{CDCl}_3$ ):  $\delta = 7.79$  (s, 1H,  $\text{HC5}'$ ); 5.62 (s, 2H,  $\text{CH}_2$ ); 4.35 (t,  $J = 7.3 \text{ Hz}$ , 2H,  $\text{PCCCCCH}_2$ ); 4.14–

4.04 (m, 4H,  $2 \times \text{POCH}_2\text{CH}_3$ ); 3.55 (s, 3H,  $\text{CH}_3$ ); 3.42 (s, 3H,  $\text{CH}_3$ ); 2.04 (qv,  $J = 7.3 \text{ Hz}$ , 2H,  $\text{PCCCCH}_2$ ); 1.77 (dt,  $J = 14.8 \text{ Hz}$ ,  $J = 7.3 \text{ Hz}$ , 2H,  $\text{PCH}_2$ ); 1.69–1.61 (m, 2H,  $\text{PCCH}_2$ ); 1.32 (t,  $J = 7.0 \text{ Hz}$ , 6H,  $2 \times \text{POCH}_2\text{CH}_3$ );  $^{13}\text{C NMR}$  (151 MHz,  $\text{CDCl}_3$ ):  $\delta = 154.5$  (s,  $\text{C}=\text{O}$ ); 151.2 (s,  $\text{C}=\text{O}$ ); 147.4; 141.7; 139.1; 123.5; 107.3; 61.6 (d,  $J = 6.5 \text{ Hz}$ ,  $\text{POC}$ ); 49.8; 41.0; 30.6 (d,  $J = 15.1 \text{ Hz}$ ,  $\text{PCCC}$ ); 29.8; 28.0; 24.9 (d,  $J = 142.1 \text{ Hz}$ ,  $\text{PC}$ ); 19.6 (d,  $J = 4.8 \text{ Hz}$ ,  $\text{PCC}$ ); 16.4 (d,  $J = 5.9 \text{ Hz}$ ,  $\text{POCC}$ );  $^{31}\text{P NMR}$  (243 MHz,  $\text{CDCl}_3$ ):  $\delta = 30.49 \text{ ppm}$ . Anal. Calcd. for  $\text{C}_{18}\text{H}_{27}\text{ClN}_7\text{O}_5\text{P}$ : C, 44.31; H, 5.58; N, 20.10. Found: C, 44.50; H, 5.61; N, 20.22.

## $^1\text{H NMR}$

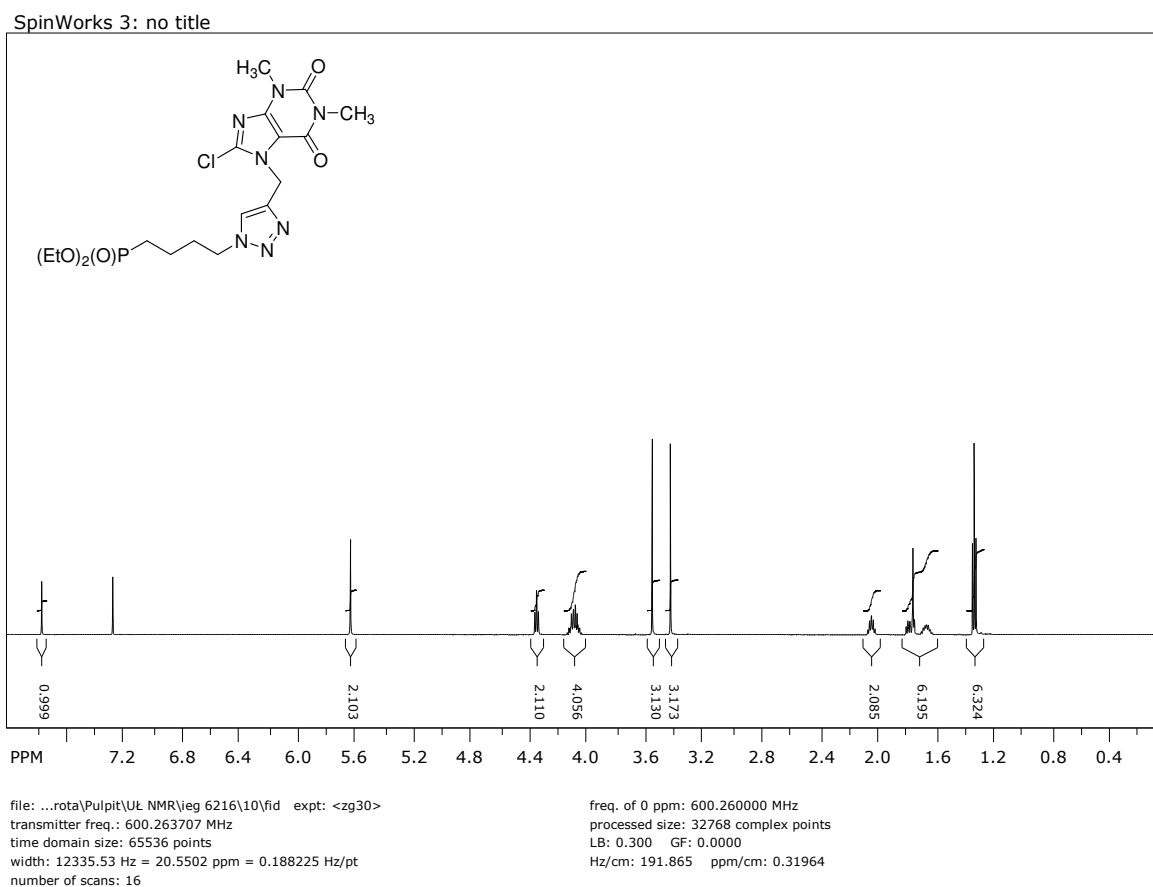

# <sup>13</sup>C NMR

SpinWorks 3: no title

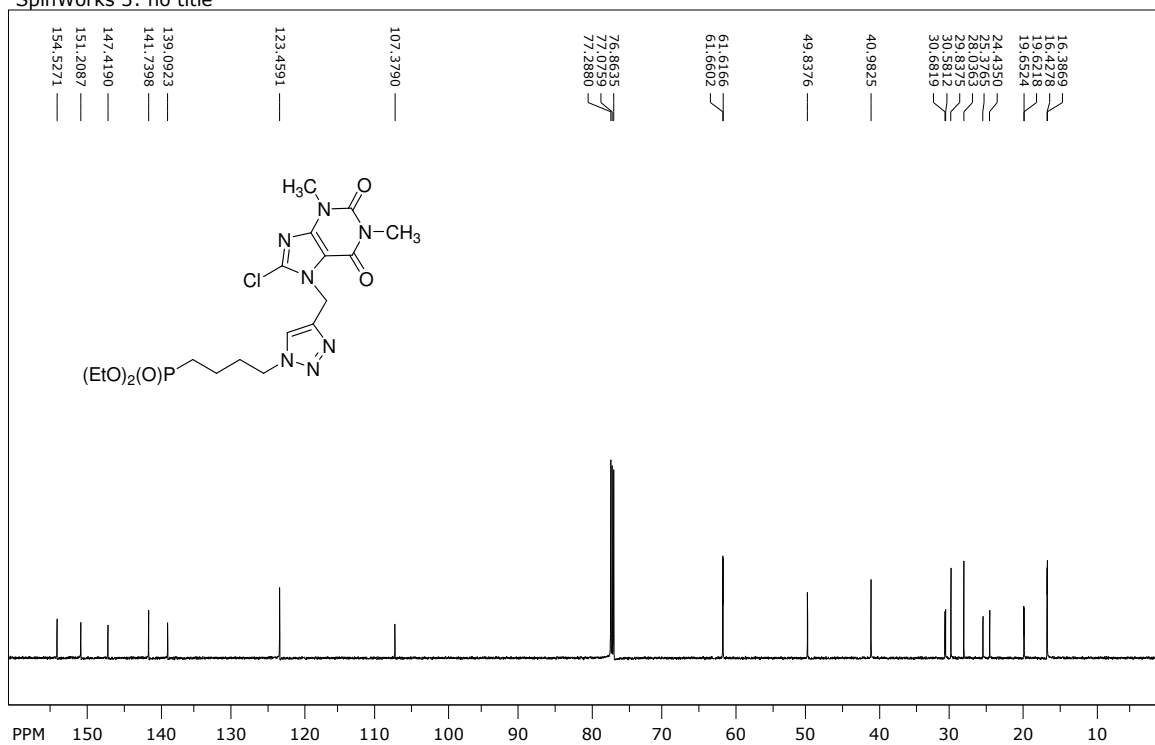

file: ...rota\Pulpit\UŁ NMR\ieg 6244\10\fid expt: <zpgg30>  
transmitter freq.: 150.950591 MHz  
time domain size: 65536 points  
width: 36057.69 Hz = 238.8708 ppm = 0.550197 Hz/pt  
number of scans: 512

freq. of 0 ppm: 150.935497 MHz  
processed size: 32768 complex points  
LB: 1.000 GF: 0.0000  
Hz/cm: 971.683 ppm/cm: 6.43709

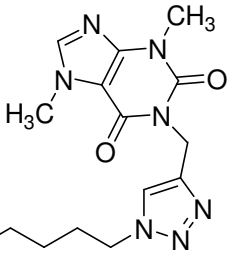

*Diethyl 4-{4-[(3,7-dimethyl-2,6-dioxopurin-1-yl)methyl]-1H-1,2,3-triazol-1-yl}butylphosphonate* **23h**. White solid; m.p.: 59–61°C; IR (KBr):  $\nu = 3432, 3115, 2983, 2952, 1708, 1662, 1235, 1025 \text{ cm}^{-1}$ ;  $^1\text{H}$  NMR (600 MHz,  $\text{CDCl}_3$ ):  $\delta = 7.62$  (s, 1H); 7.51 (s, 1H); 5.33 (s, 2H,  $\text{CH}_2$ ); 4.33 (t,  $J = 7.3$  Hz, 2H,  $\text{PCCCH}_2$ ); 4.13–4.05 (m, 4H,  $2 \times \text{POCH}_2\text{CH}_3$ ); 4.01 (s, 3H,  $\text{CH}_3$ ); 3.59 (s, 3H,  $\text{CH}_3$ ); 2.02 (qv,  $J = 7.3$  Hz, 2H,  $\text{PCCCH}_2$ ); 1.73 (dt,  $J = 18.0$  Hz,  $J = 7.3$  Hz, 2H,  $\text{PCH}_2$ ); 1.63 (dq,  $J = 14.0$  Hz,  $J = 7.3$  Hz, 2H,  $\text{PCCH}_2$ ); 1.32 (t,  $J = 7.0$  Hz, 6H,  $2 \times \text{POCH}_2\text{CH}_3$ );  $^{13}\text{C}$  NMR (151 MHz,  $\text{CDCl}_3$ ):  $\delta = 154.8$  (s,  $\text{C}=\text{O}$ ); 151.3 (s,  $\text{C}=\text{O}$ ); 148.9; 143.6; 141.7; 123.1; 107.6; 61.6 (d,  $J = 6.5$  Hz, POC); 49.6; 36.0; 33.5; 30.7 (d,  $J = 15.3$  Hz, PCCC); 29.7; 25.0 (d,  $J = 144.9$  Hz, PC); 19.6 (d,  $J = 4.7$  Hz, PCC); 16.4 (d,  $J = 6.1$  Hz, POCC);  $^{31}\text{P}$  NMR (243 MHz,  $\text{CDCl}_3$ ):  $\delta = 30.91$  ppm. Anal. Calcd. for  $\text{C}_{18}\text{H}_{28}\text{N}_7\text{O}_5\text{P}$ : C, 47.68; H, 6.22; N, 21.62. Found: C, 47.74; H, 6.03; N, 21.71.

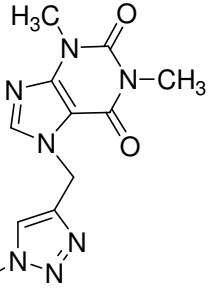

*Diethyl 4-{4-[(1,3-dimethyl-2,6-dioxopurin-7-yl)methyl]-1H-1,2,3-triazol-1-yl}butylphosphonate* **23i**. White solid; m.p.: 58–59°C; IR (KBr):  $\nu = 3432, 3115, 2983, 2952, 1708, 1662, 1235, 1025 \text{ cm}^{-1}$ ;  $^1\text{H}$  NMR (600 MHz,  $\text{CDCl}_3$ ):  $\delta = 7.84$  (s, 1H); 7.83 (s, 1H); 5.60 (s, 2H,  $\text{CH}_2$ ); 4.37 (t,  $J = 7.1$  Hz, 2H,  $\text{PCCCH}_2$ ); 4.15–4.05 (m, 4H,  $2 \times \text{POCH}_2\text{CH}_3$ ); 3.60 (s, 3H,  $\text{CH}_3$ ); 3.44 (s, 3H,  $\text{CH}_3$ ); 2.06 (qv,  $J = 7.1$  Hz, 2H,  $\text{PCCCH}_2$ ); 1.80–1.74 (m, 2H,  $\text{PCH}_2$ ); 1.69–1.62 (m, 2H,  $\text{PCCH}_2$ ); 1.33 (t,  $J = 7.4$  Hz, 6H,  $2 \times \text{POCH}_2\text{CH}_3$ );  $^{13}\text{C}$  NMR (151 MHz,  $\text{CDCl}_3$ ):  $\delta = 155.4$  (s,  $\text{C}=\text{O}$ ); 151.6 (s,  $\text{C}=\text{O}$ ); 149.0; 142.2; 141.4; 123.5; 106.5; 61.6 (d,  $J = 6.4$  Hz, POC); 49.9; 41.5; 30.6 (d,  $J = 14.7$  Hz, PCCC); 29.8; 25.0 (d,  $J = 142.2$  Hz, PC); 19.6 (d,  $J = 4.5$  Hz, PCC); 16.4 (d,  $J = 6.4$  Hz, POCC);  $^{31}\text{P}$  NMR (243 MHz,  $\text{CDCl}_3$ ):  $\delta = 30.79$  ppm. Anal. Calcd. for  $\text{C}_{18}\text{H}_{28}\text{N}_7\text{O}_5\text{P}$ : C, 47.68; H, 6.22; N, 21.62. Found: C, 47.80; H, 6.00; N, 21.74.

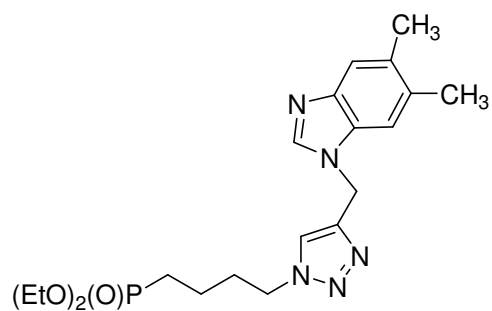

*Diethyl 4-(4-[(5,6-dimethylbenzimidazol-1-yl)methyl]-1H-1,2,3-triazol-1-yl)butylphosphonate*

**23j.** Yellow oil; IR (film):  $\nu = 3303, 3102, 2982, 1219, 1027 \text{ cm}^{-1}$ ;  $^1\text{H NMR}$  (600 MHz,  $\text{CDCl}_3$ ):  $\delta = 8.30$  (s, 1H); 7.60 (s, 1H,); 7.30 (s, 1H,); 7.32 (s, 1H,); 5.48 (s, 2H,  $\text{CH}_2$ ); 4.38 (t,  $J = 7.4 \text{ Hz}$ , 2H,  $\text{PCCCH}_2$ ); 4.16–4.04 (m, 4H,  $2 \times \text{POCH}_2\text{CH}_3$ ); 2.40 (s, 3H,  $\text{CH}_3$ ); 2.39 (s, 3H,  $\text{CH}_3$ ); 1.99 (qv,  $J = 7.4 \text{ Hz}$ , 2H,  $\text{PCCCH}_2$ ); 1.75 (dt,  $J = 18.2 \text{ Hz}$ ,  $J = 7.4 \text{ Hz}$ , 2H,  $\text{PCH}_2$ ); 1.63 (dq,  $J = 15.4 \text{ Hz}$ ,  $J = 7.4 \text{ Hz}$ , 2H,  $\text{PCCCH}_2$ ); 1.31 (t,  $J = 7.1 \text{ Hz}$ , 6H,  $2 \times \text{POCH}_2\text{CH}_3$ );  $^{13}\text{C NMR}$  (151 MHz,  $\text{CDCl}_3$ ):  $\delta = 143.0$ ; 132.7; 130.8; 122.1; 120.3; 61.6 (d,  $J = 6.6 \text{ Hz}$ , POC); 49.8; 30.5 (d,  $J = 15.1 \text{ Hz}$ , PCCC); 24.9 (d,  $J = 142.1 \text{ Hz}$ , PC); 20.4; 20.2; 19.5 (d,  $J = 4.7 \text{ Hz}$ , PCC); 16.4 (d,  $J = 5.8 \text{ Hz}$ , POCC);  $^{31}\text{P NMR}$  (243 MHz,  $\text{CDCl}_3$ ):  $\delta = 30.84 \text{ ppm}$ . Anal. Calcd. for  $\text{C}_{20}\text{H}_{30}\text{N}_5\text{O}_3\text{P}$ : C, 57.27; H, 7.21; N, 16.70. Found: C, 57.10; H, 7.08; N, 16.79.



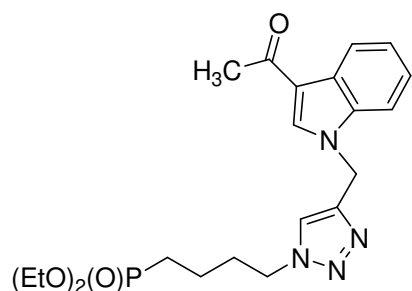

*Diethyl 4-[(3-acetylimidol-1-yl)methyl]-1H-1,2,3-triazol-1-ylbutylphosphonate* **23k**. Colourless oil; IR (film):  $\nu = 3283, 3110, 2983, 2872, 1797, 1231, 1045, 750 \text{ cm}^{-1}$ ;  $^1\text{H}$  NMR (300 MHz,  $\text{CDCl}_3$ ):  $\delta = 8.45\text{--}8.38$  (m, 1H); 7.76 (s, 1H,  $\text{HC5}'$ ); 7.43–7.39 (m, 1H); 7.36–7.27 (m, 3H); 5.42 (s, 2H,  $\text{CH}_2$ ); 4.37 (t,  $J = 7.0 \text{ Hz}$ , 2H,  $\text{PCCCCCH}_2$ ); 4.10–4.00

(m, 4H,  $2 \times \text{POCH}_2\text{CH}_3$ ); 2.53 (s, 3H,  $\text{CH}_3$ ); 1.98 (qv,  $J = 7.0 \text{ Hz}$ , 2H,  $\text{PCCCCH}_2$ ); 1.85–1.50 (m, 4H,  $\text{PCH}_2\text{CH}_2$ ); 1.28 (t,  $J = 7.0 \text{ Hz}$ , 6H,  $2 \times \text{POCH}_2\text{CH}_3$ );  $^{13}\text{C}$  NMR (75.5 MHz,  $\text{CDCl}_3$ ):  $\delta = 193.0$  (s,  $\text{C}=\text{O}$ ); 143.0; 136.5; 134.8; 123.6; 122.8; 122.7; 122.1; 117.5; 109.9; 61.7 (d,  $J = 6.4 \text{ Hz}$ , POC); 50.0; 42.5; 30.8 (d,  $J = 15.2 \text{ Hz}$ , PCCC); 27.8; 24.9 (d,  $J = 141.7 \text{ Hz}$ , PC); 19.7 (d,  $J = 4.9 \text{ Hz}$ , PCC); 16.6 (d,  $J = 6.0 \text{ Hz}$ , POCC);  $^{31}\text{P}$  NMR (121.5 MHz,  $\text{CDCl}_3$ ):  $\delta = 31.92$  ppm. Anal. Calcd. for  $\text{C}_{21}\text{H}_{29}\text{N}_4\text{O}_4\text{P}$ : C, 58.32; H, 6.76; N, 12.96. Found: C, 58.48; H, 6.81; N, 13.10.

## $^1\text{H}$ NMR

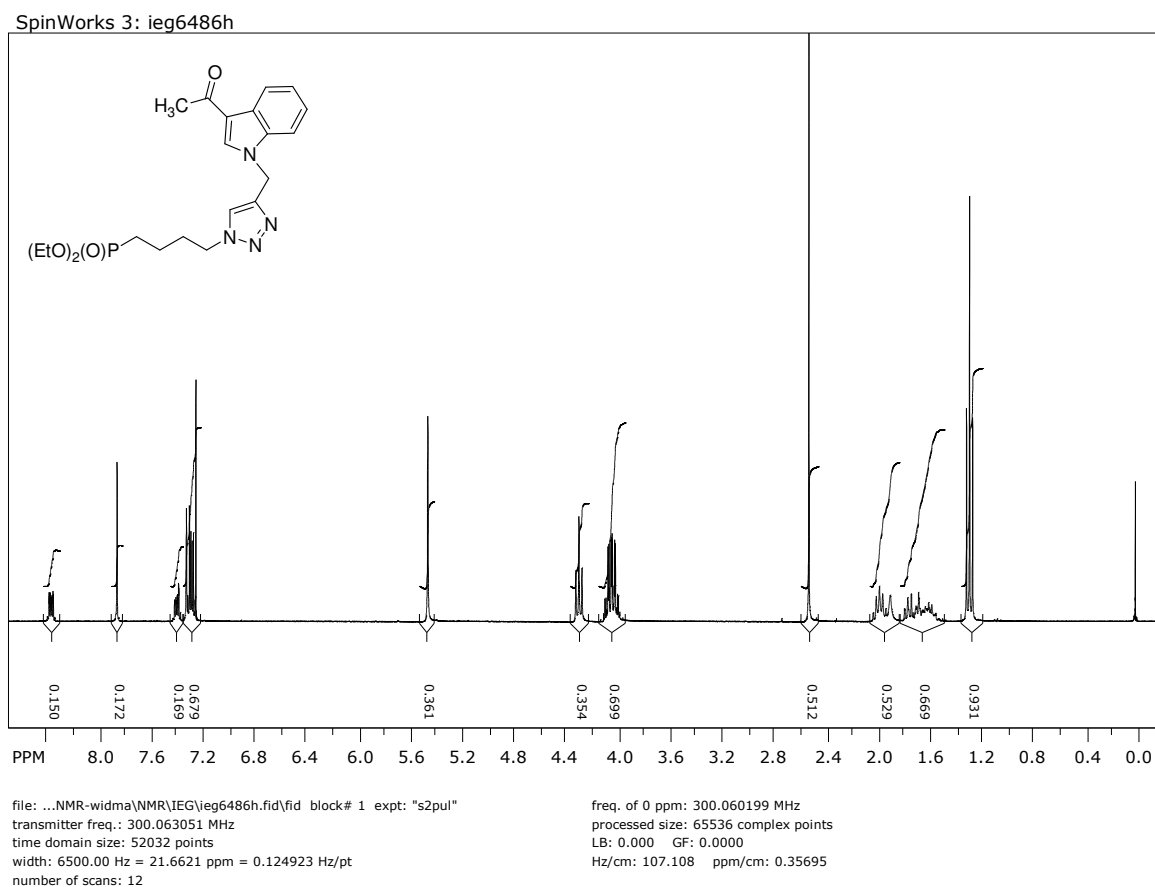



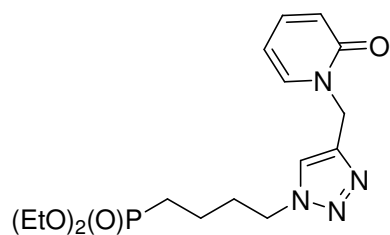

*Diethyl 4-{4-[(2-oxopyridin-1-yl)methyl]-1H-1,2,3-triazol-1-yl}butylphosphonate* **231**. Brown oil; IR (film):  $\nu = 3134, 2996, 2935, 1659, 1222; 1020, 968 \text{ cm}^{-1}$ ;  $^1\text{H NMR}$  (300 MHz,  $\text{CDCl}_3$ ):  $\delta = 7.78$  (s, 1H, *HC5'*); 7.60 (dd,  $J = 6.7 \text{ Hz}, J = 2.2 \text{ Hz}$ , 1H); 7.38 (ddd,  $J = 9.1 \text{ Hz}, J = 6.7 \text{ Hz}, J = 2.2 \text{ Hz}$ , 1H); 6.54 (d,  $J = 9.1 \text{ Hz}$ , 1H); 6.19 (dt,  $J = 6.7 \text{ Hz}, J = 1.5 \text{ Hz}$ , 1H); 5.18 (s, 2H,  $\text{CH}_2$ ); 4.33 (t,  $J = 7.2 \text{ Hz}$ , 2H,  $\text{PCCCCCH}_2$ ); 4.17–4.00 (m, 4H,  $2 \times \text{POCH}_2\text{CH}_3$ ); 2.22–1.96 (m, 2H,  $\text{PCCCH}_2$ ); 1.82–1.60 (m, 4H,  $\text{PCH}_2\text{CH}_2$ ); 1.31 (t,  $J = 6.9 \text{ Hz}$ , 6H,  $2 \times \text{POCH}_2\text{CH}_3$ );  $^{13}\text{C NMR}$  (75.5 MHz,  $\text{CDCl}_3$ ):  $\delta = 162.3$  (s,  $\text{C}=\text{O}$ ); 142.7 (s,  $\text{HC}=\text{C}$ ); 140.0; 137.8; 123.9 (s,  $\text{HC}=\text{C}$ ); 120.8; 106.6; 61.7 (d,  $J = 6.5 \text{ Hz}$ , POC); 49.9; 44.7; 30.8 (d,  $J = 15.5 \text{ Hz}$ , PCCC); 25.1 (d,  $J = 141.7 \text{ Hz}$ , PC); 19.8 (d,  $J = 5.2 \text{ Hz}$ , PCC); 16.6 (d,  $J = 6.0 \text{ Hz}$ , POCC); 12.2 (s,  $\text{CH}_3$ );  $^{31}\text{P NMR}$  (121.5 MHz,  $\text{CDCl}_3$ ):  $\delta = 32.08 \text{ ppm}$ . Anal. Calcd. for  $\text{C}_{16}\text{H}_{25}\text{N}_4\text{O}_4\text{P}$ : C, 52.17; H, 6.84; N, 15.21. Found: C, 51.90; H, 6.78; N, 15.11.

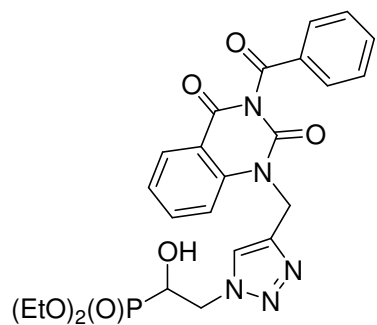

*Diethyl 2-(4-([3-benzoyl-2,4-dioxypyrimidin-1-yl]methyl)-1H-1,2,3-triazol-1-yl)-1-hydroxyethylphosphonate* **24e.**

Colourless oil; IR (film):  $\nu = 3356, 2982, 2831, 1750, 1702, 1668, 1234, 1027, 785, 688 \text{ cm}^{-1}$ ;  $^1\text{H NMR}$  (600 MHz,  $\text{CDCl}_3$ ):  $\delta = 8.16$  (dd,  $J = 7.9 \text{ Hz}, J = 1.4 \text{ Hz}, 1\text{H}$ ); 7.97–7.94 (m, 2H,  $2\times o\text{-CH}$ ); 7.92 (s, 1H,  $\text{HC5}'$ ); 7.88 (brd,  $J = 8.3 \text{ Hz}, 1\text{H}$ ); 7.75 (ddd,  $J = 8.3 \text{ Hz}, J = 7.9 \text{ Hz}, J = 1.4 \text{ Hz}, 1\text{H}$ ); 7.68–7.62 (m, 1H,  $p\text{-CH}$ ); 7.52–7.46 (m, 2H,  $2\times m\text{-CH}$ ); 7.31 (dt,  $J = 7.9 \text{ Hz}, J = 0.6 \text{ Hz}, 1\text{H}$ ); 5.44 (AB,  $J = 15.8 \text{ Hz}, 1\text{H}, \text{CH}_a\text{H}_b$ ); 5.42 (AB,  $J = 15.8 \text{ Hz}, 1\text{H}, \text{CH}_a\text{H}_b$ ); 4.77 (ddd,  $J = 14.3 \text{ Hz}, J = 5.3 \text{ Hz}, J = 2.8 \text{ Hz}, 1\text{H}, \text{PCCH}_a\text{H}_b$ ); 4.48 (ddd,  $J = 14.3 \text{ Hz}, J = 10.0 \text{ Hz}, J = 5.8 \text{ Hz}, 1\text{H}, \text{PCCH}_a\text{H}_b$ ); 4.23 (ddd,  $J = 10.3 \text{ Hz}, J = 7.9 \text{ Hz}, J = 2.8 \text{ Hz}, 1\text{H}, \text{PCH(OH)}$ ); 4.16–4.04 (m, 4H,  $2\times \text{POCH}_2\text{CH}_3$ ); 1.27 (t,  $J = 7.0 \text{ Hz}, 3\text{H}, \text{POCH}_2\text{CH}_3$ ); 1.26 (t,  $J = 7.0 \text{ Hz}, 3\text{H}, \text{POCH}_2\text{CH}_3$ );  $^{13}\text{C NMR}$  (75.5 MHz,  $\text{CDCl}_3$ ):  $\delta = 168.6$  (s,  $\text{C=O}$ ); 161.0 (s,  $\text{C=O}$ ); 149.4 (s,  $\text{C=O}$ ); 142.0 (s,  $\text{HC=C}$ ); 140.2; 136.2; 135.2; 131.6; 130.5; 129.3; 128.8; 125.6 (s,  $\text{HC=C}$ ); 123.8; 115.5; 115.4; 67.0 (d,  $J = 163.2 \text{ Hz}, \text{PC}$ ); 63.8 (d,  $J = 7.5 \text{ Hz}, \text{POC}$ ); 63.6 (d,  $J = 7.5 \text{ Hz}, \text{POC}$ ); 51.6 (d,  $J = 10.0 \text{ Hz}, \text{PCC}$ ); 39.0; 16.6 (d,  $J = 5.3 \text{ Hz}, \text{POCC}$ ); 16.5 (d,  $J = 5.3 \text{ Hz}, \text{POCC}$ );  $^{31}\text{P NMR}$  (121.5 MHz,  $\text{CDCl}_3$ ):  $\delta = 21.21 \text{ ppm}$ . Anal. Calcd. for  $\text{C}_{24}\text{H}_{26}\text{N}_5\text{O}_7\text{P}$ : C, 54.65; H, 4.97; N, 13.28. Found: C, 54.47; H, 5.11; N, 13.12.

# <sup>1</sup>H NMR

SpinWorks 3: no title

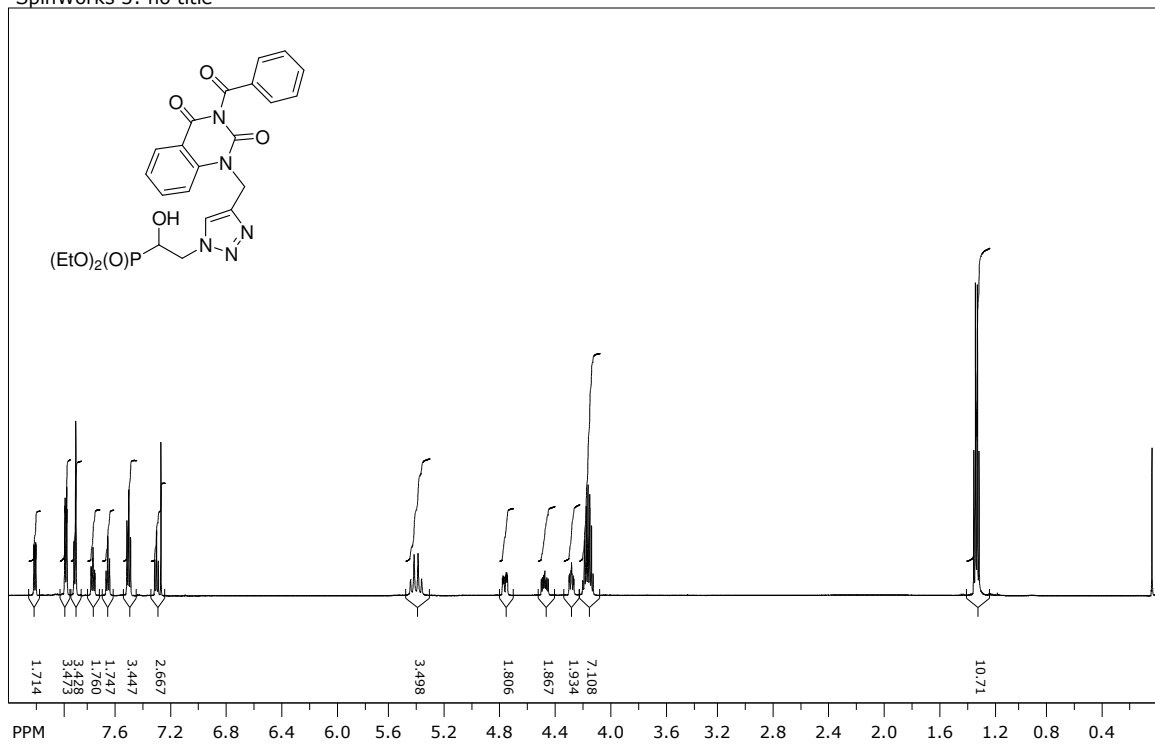

file: ...NMR-widma\NMR\IEG\ieg-7248\10\fid expt: <zg30>  
transmitter freq.: 600.263707 MHz  
time domain size: 65536 points  
width: 12335.53 Hz = 20.5502 ppm = 0.188225 Hz/pt  
number of scans: 16

freq. of 0 ppm: 600.260000 MHz  
processed size: 32768 complex points  
LB: 0.300 GF: 0.0000  
Hz/cm: 203.032 ppm/cm: 0.33824

# <sup>13</sup>C NMR

SpinWorks 3: ieg6418C

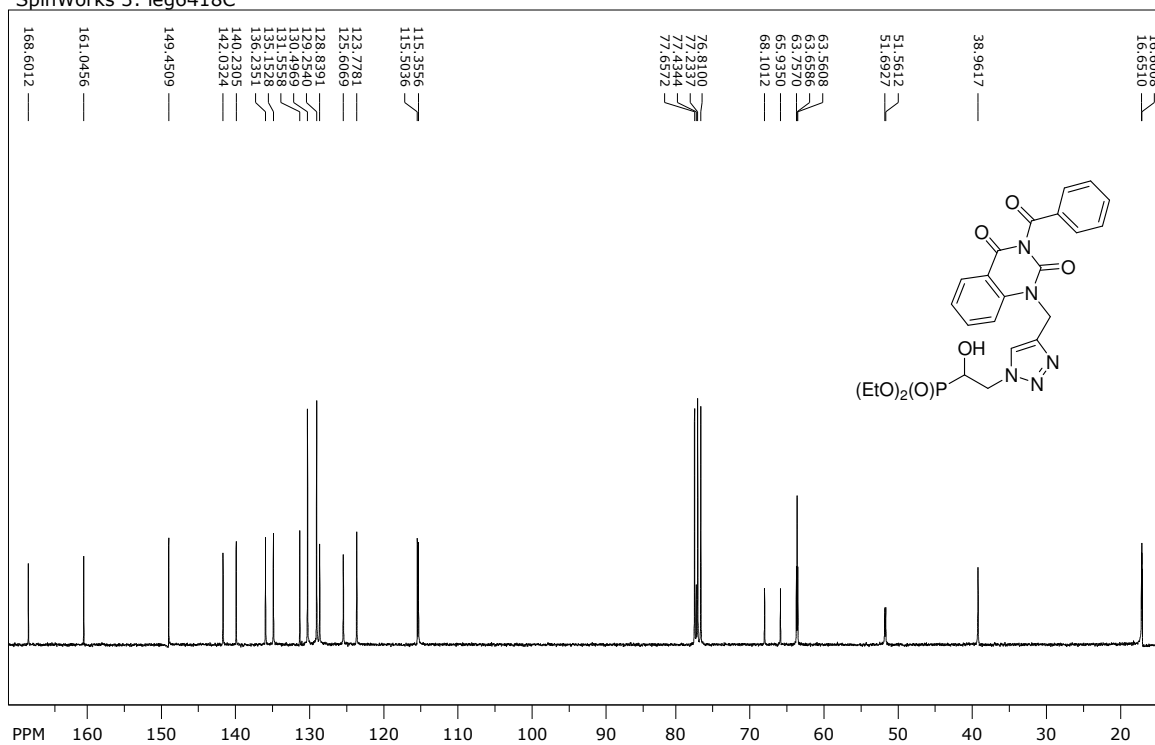

file: ...NMR-widma\NMR\IEG\ieg6418C.fid block# 1 expt: "s2pul"  
transmitter freq.: 75.457729 MHz  
time domain size: 68096 points  
width: 18761.73 Hz = 248.6389 ppm = 0.275519 Hz/pt  
number of scans: 1760

freq. of 0 ppm: 75.450192 MHz  
processed size: 131072 complex points  
LB: 1.000 GF: 0.0000  
Hz/cm: 475.397 ppm/cm: 6.30017

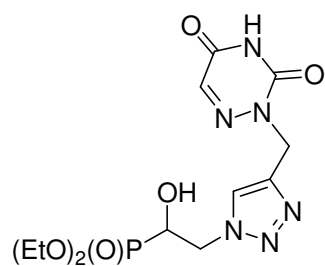

*Diethyl 2-[4-[(3,5-dioxo-1,2,4-triazin-2-yl)methyl]-1H-1,2,3-triazol-1-yl]-1-hydroxyethylphosphonate* **24f**. White solid; m.p.: 145–147°C; IR (KBr):  $\nu = 3300, 2913, 2837, 1729, 1674, 1023 \text{ cm}^{-1}$ ;  $^1\text{H}$  NMR (300 MHz,  $\text{CDCl}_3$ ):  $\delta = 12.07$  (s, 1H, NH); 7.92 (s, 1H); 7.41 (s, 1H); 5.30 (brs, 1H, OH); 5.15 (s, 2H,  $\text{CH}_2$ ); 4.82 (ddd,  $J = 14.0 \text{ Hz}$ ,  $J = 4.6 \text{ Hz}$ ,  $J = 2.2 \text{ Hz}$ , 1H,  $\text{PCCH}_a\text{H}_b$ ); 4.52–4.34 (m, 2H,  $\text{PCH}(\text{OH})$ ,  $\text{PCCH}_a\text{H}_b$ ); 4.15–4.02 (m, 4H,  $2 \times \text{POCH}_2\text{CH}_3$ ); 1.36 (t,  $J = 6.9 \text{ Hz}$ , 3H,  $\text{POCH}_2\text{CH}_3$ ); 1.34 (t,  $J = 6.9 \text{ Hz}$ , 3H,  $\text{POCH}_2\text{CH}_3$ );  $^{13}\text{C}$  NMR (75.5 MHz,  $\text{CDCl}_3$ ):  $\delta = 155.9$  (s, C=O); 149.5 (C=O); 141.2 (s, HC=C); 135.1 (s, HC=N); 125.7 (s, HC=C); 66.8 (d,  $J = 144.0 \text{ Hz}$ , PC); 63.8 (d,  $J = 6.6 \text{ Hz}$ , POC); 63.7 (d,  $J = 6.6 \text{ Hz}$ , POC); 51.7 (d,  $J = 10.6 \text{ Hz}$ ); 34.7; 16.6 (d,  $J = 5.5 \text{ Hz}$ , POCC);  $^{31}\text{P}$  NMR (121.5 MHz,  $\text{CDCl}_3$ ):  $\delta = 21.60$  ppm. Anal. Calcd. for  $\text{C}_{12}\text{H}_{19}\text{N}_6\text{O}_6\text{P}$ : C, 38.51; H, 5.12; N, 22.45. Found: C, 38.27; H, 5.02; N, 22.55.

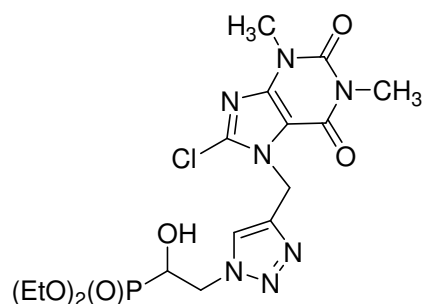

*Diethyl 2-[4-[(8-chloro-1,3-dimethyl-2,6-dioxopurin-7-yl)methyl]-1H-1,2,3-triazol-1-yl]-1-hydroxyethylphosphonate* **24g**. White solid; m.p.: 183–184°C; IR (KBr):  $\nu = 3281, 3057, 2986, 1707, 1665, 1216, 1047 \text{ cm}^{-1}$ ;  $^1\text{H}$  NMR (300 MHz,  $\text{CDCl}_3$ ):  $\delta = 7.95$  (s, 1H,  $\text{HC5}'$ ); 5.61 (s, 2H,  $\text{CH}_2$ ); 5.08 (t,  $J = 5.7 \text{ Hz}$ , 1H, OH); 4.75 (ddd,  $J = 14.2 \text{ Hz}$ ,  $J = 5.1 \text{ Hz}$ ,  $J = 2.6 \text{ Hz}$ , 1H,  $\text{PCCH}_a\text{H}_b$ ); 4.44 (ddd,  $J = 14.2 \text{ Hz}$ ,  $J = 10.0 \text{ Hz}$ ,  $J = 5.6 \text{ Hz}$ , 1H,  $\text{PCCH}_a\text{H}_b$ ); 4.28 (dddd,  $J = 10.0 \text{ Hz}$ ,  $J = 8.0 \text{ Hz}$ ,  $J = 5.7 \text{ Hz}$ ,  $J = 5.1 \text{ Hz}$ , 1H,  $\text{PCH}(\text{OH})$ ); 4.21–4.10 (m, 4H,  $2 \times \text{POCH}_2\text{CH}_3$ ); 3.51 (s, 3H,  $\text{CH}_3$ ); 3.37 (s, 3H,  $\text{CH}_3$ ); 1.33 (t,  $J = 7.0 \text{ Hz}$ , 3H,  $\text{POCH}_2\text{CH}_3$ ); 1.32 (t,  $J = 7.0 \text{ Hz}$ , 3H,  $\text{POCH}_2\text{CH}_3$ );  $^{13}\text{C}$  NMR (75.5 MHz,  $\text{CDCl}_3$ ):  $\delta = 154.4$  (s, C=O); 151.1 (s, C=O); 147.3; 139.0; 125.2; 107.4; 67.0 (d,  $J = 163.8 \text{ Hz}$ , PC); 63.7 (d,  $J = 7.2 \text{ Hz}$ , POC); 63.5 (d,  $J = 7.2 \text{ Hz}$ , POC); 51.7 (d,  $J = 9.7 \text{ Hz}$ , PCC); 41.1; 30.0; 28.2; 16.6 (d,  $J = 5.5 \text{ Hz}$ , POCC);  $^{31}\text{P}$  NMR (121.5 MHz,  $\text{CDCl}_3$ ):  $\delta = 20.42$  ppm. Anal. Calcd. for  $\text{C}_{16}\text{H}_{23}\text{ClN}_7\text{O}_6\text{P}$ : C, 40.39; H, 4.87; N, 20.61. Found: C, 40.22; H, 5.00; N, 20.56.

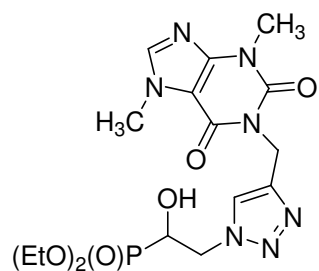

*Diethyl 2-[4-[(3,7-dimethyl-2,6-dioxopurin-1-yl)methyl]-1H-1,2,3-triazol-1-yl]-1-hydroxyethylphosphonate* **24h**. White powder; m.p.: 166–168°C; IR (KBr):  $\nu = 3237, 2989, 1708, 1663, 1235, 1023 \text{ cm}^{-1}$ ;  $^1\text{H NMR}$  (600 MHz,  $\text{CDCl}_3$ ):  $\delta = 7.80$  (s, 1H); 7.53 (s, 1H,  $\text{HC5}'$ ); 5.35 (AB,  $J = 14.6 \text{ Hz}$ , 1H,  $\text{CH}_a\text{H}_b$ ); 5.30 (AB,  $J = 14.6 \text{ Hz}$ , 1H,  $\text{CH}_a\text{H}_b$ ); 4.79 (ddd,  $J = 14.2 \text{ Hz}$ ,  $J = 6.0 \text{ Hz}$ ,  $J = 2.5 \text{ Hz}$ , 1H,  $\text{PCCH}_a\text{H}_b$ ); 4.47 (ddd,  $J = 14.2 \text{ Hz}$ ,  $J = 9.7 \text{ Hz}$ ,  $J = 5.2 \text{ Hz}$ , 1H,  $\text{PCCH}_a\text{H}_b$ ); 4.40–4.34 (m, 1H,  $\text{PCH}(\text{OH})$ ); 4.27–4.15 (m, 4H,  $2 \times \text{POCH}_2\text{CH}_3$ ); 4.06 (dd,  $J = 9.4 \text{ Hz}$ ,  $J = 5.8 \text{ Hz}$ , 1H); 4.01 (s, 3H,  $\text{CH}_3$ ); 3.60 (s, 3H,  $\text{CH}_3$ ); 1.38 (t,  $J = 7.0 \text{ Hz}$ , 3H,  $\text{POCH}_2\text{CH}_3$ ); 1.36 (t,  $J = 7.0 \text{ Hz}$ , 3H,  $\text{POCH}_2\text{CH}_3$ );  $^{13}\text{C NMR}$  (151.5 MHz,  $\text{CDCl}_3$ ):  $\delta = 154.7$  (s,  $\text{C}=\text{O}$ ); 151.2 (s,  $\text{C}=\text{O}$ ); 148.8; 143.2; 141.9; 124.9; 107.6; 67.0 (d,  $J = 165.1 \text{ Hz}$ , PC); 64.4 (d,  $J = 6.9 \text{ Hz}$ , POC); 63.2 (d,  $J = 6.9 \text{ Hz}$ , POC); 51.7 (d,  $J = 9.6 \text{ Hz}$ , PCC); 36.0; 33.6; 29.7; 16.4 (d,  $J = 5.3 \text{ Hz}$ , POCC);  $^{31}\text{P NMR}$  (243 MHz,  $\text{CDCl}_3$ ):  $\delta = 19.86 \text{ ppm}$ . Anal. Calcd. for  $\text{C}_{16}\text{H}_{24}\text{N}_7\text{O}_6\text{P}$ : C, 43.54; H, 5.48; N, 22.21. Found: C, 43.67; H, 5.28; N, 22.30.

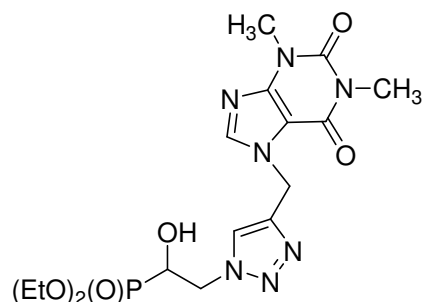

*Diethyl 2-[4-[(1,3-dimethyl-2,6-dioxopurin-7-yl)methyl]-1H-1,2,3-triazol-1-yl]-1-hydroxyethylphosphonate* **24i**. White powder; m.p.: 164–165°C; IR (KBr):  $\nu = 3264, 3152, 2990, 1705, 1660, 1224, 1025 \text{ cm}^{-1}$ ;  $^1\text{H NMR}$  (600 MHz,  $\text{CDCl}_3$ ):  $\delta = 8.00$  (s, 1H); 7.84 (s, 1H,  $\text{HC5}'$ ); 5.62 (AB,  $J = 15.0 \text{ Hz}$ , 1H,  $\text{CH}_a\text{H}_b$ ); 5.58 (AB,  $J = 15.0 \text{ Hz}$ , 1H,  $\text{CH}_a\text{H}_b$ ); 4.80 (ddd,  $J = 14.3 \text{ Hz}$ ,  $J = 5.2 \text{ Hz}$ ,  $J = 2.7 \text{ Hz}$ , 1H,  $\text{PCCH}_a\text{H}_b$ ); 4.78 (dd,  $J = 13.3 \text{ Hz}$ ,  $J = 5.9 \text{ Hz}$ , 1H); 4.49 (ddd,  $J = 14.3 \text{ Hz}$ ,  $J = 10.0 \text{ Hz}$ ,  $J = 5.6 \text{ Hz}$ , 1H,  $\text{PCCH}_a\text{H}_b$ ); 4.36–4.28 (m, 1H,  $\text{PCH}(\text{OH})$ ); 4.27–4.16 (m, 4H,  $2 \times \text{POCH}_2\text{CH}_3$ ); 3.57 (s, 3H,  $\text{CH}_3$ ); 3.41 (s, 3H,  $\text{CH}_3$ ); 1.37 (t,  $J = 7.1 \text{ Hz}$ , 3H,  $\text{POCH}_2\text{CH}_3$ ); 1.36 (t,  $J = 7.1 \text{ Hz}$ , 3H,  $\text{POCH}_2\text{CH}_3$ );  $^{13}\text{C NMR}$  (151 MHz,  $\text{CDCl}_3$ ):  $\delta = 155.4$  (s,  $\text{C}=\text{O}$ ); 151.6 (s,  $\text{C}=\text{O}$ ); 148.9; 141.8; 141.5; 125.4; 106.5; 67.0 (d,  $J = 164.6 \text{ Hz}$ , PC); 63.6 (d,  $J = 7.4 \text{ Hz}$ , POC); 63.4 (d,  $J = 7.4 \text{ Hz}$ , POC); 51.7 (d,  $J = 9.6 \text{ Hz}$ , PCC); 41.4; 29.8; 27.9; 16.4 (d,  $J = 5.9 \text{ Hz}$ , POCC);  $^{31}\text{P NMR}$  (243 MHz,  $\text{CDCl}_3$ ):  $\delta = 19.90 \text{ ppm}$ . Anal. Calcd. for  $\text{C}_{16}\text{H}_{24}\text{N}_7\text{O}_6\text{P}$ : C, 43.54; H, 5.48; N, 22.21. Found: C, 43.38; H, 5.55; N, 22.30.



# <sup>1</sup>H NMR

SpinWorks 3: no title

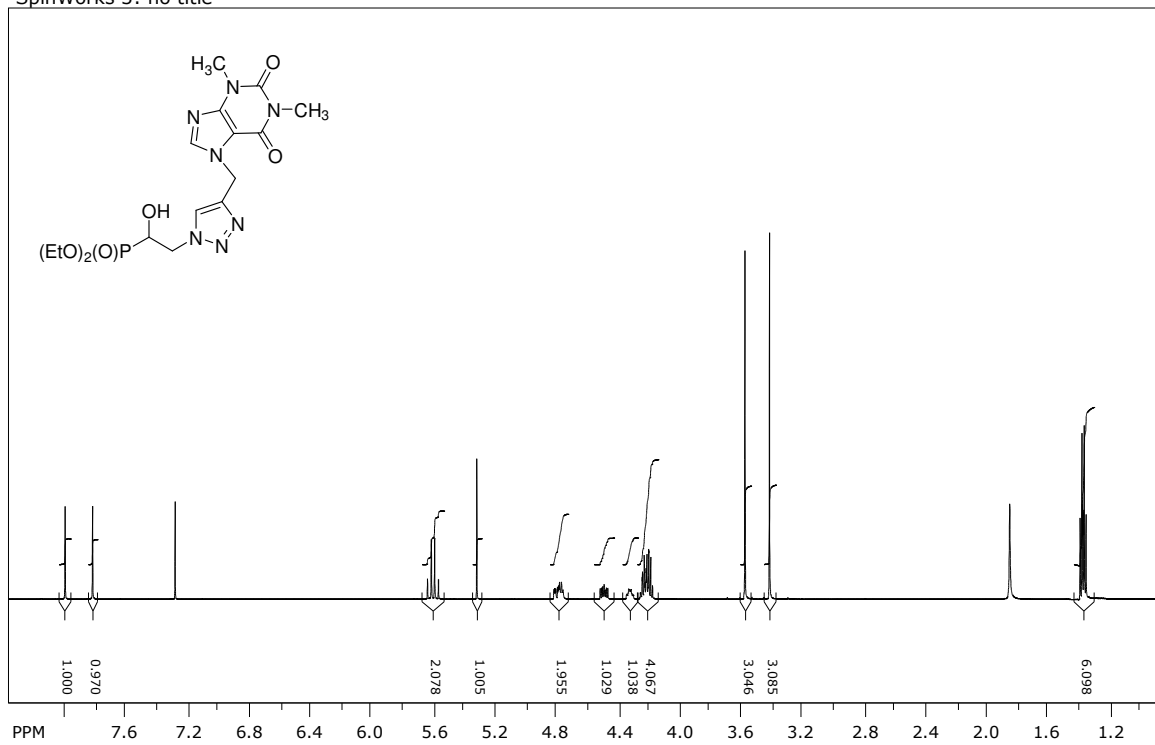

file: ...idma\widma NMR\nmr\ieg 6263\10\fid expt: <zg30>  
transmitter freq.: 600.263707 MHz  
time domain size: 65536 points  
width: 12335.53 Hz = 20.5502 ppm = 0.188225 Hz/pt  
number of scans: 16

freq. of 0 ppm: 600.260000 MHz  
processed size: 32768 complex points  
LB: 0.300 GF: 0.0000  
Hz/cm: 180.856 ppm/cm: 0.30129

# <sup>13</sup>C NMR

SpinWorks 3: no title

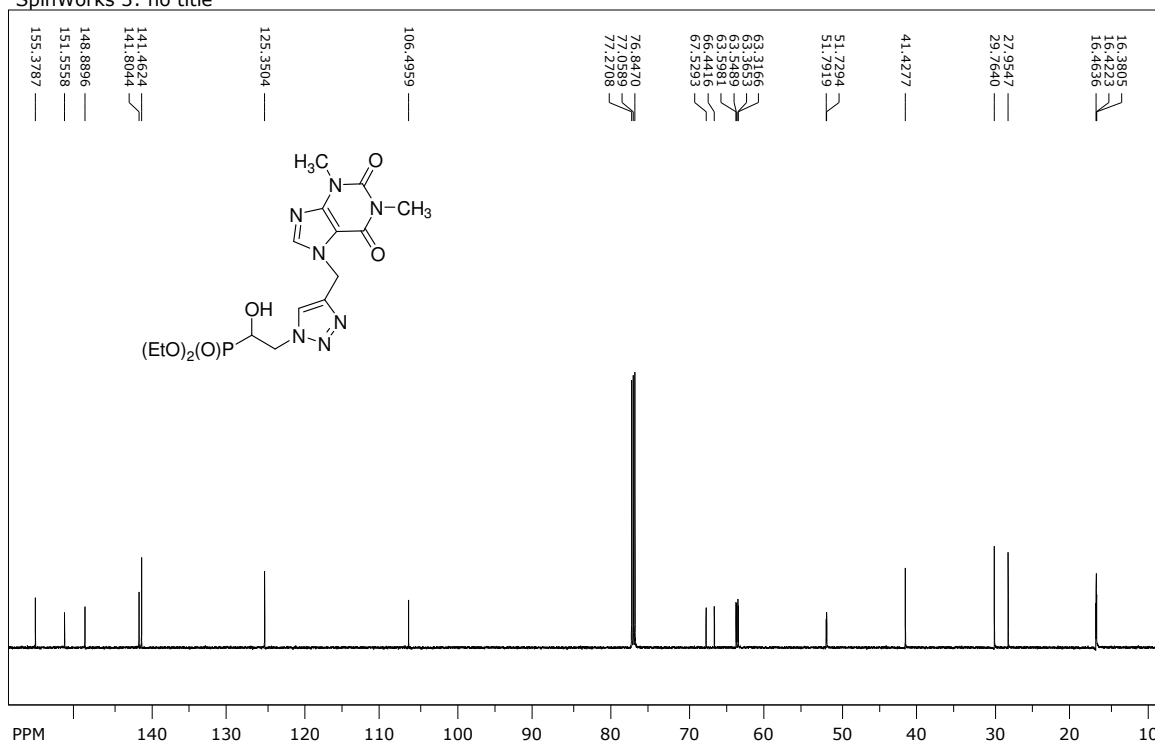

file: ...idma\widma NMR\nmr\ieg-6272\10\fid exp: <zpgg30>  
transmitter freq.: 150.950591 MHz  
time domain size: 65536 points  
width: 36057.69 Hz = 238.8708 ppm = 0.550197 Hz/pt  
number of scans: 512

freq. of 0 ppm: 150.935497 MHz  
processed size: 32768 complex points  
LB: 1.000 GF: 0.0000  
Hz/cm: 912.504 ppm/cm: 6.04505

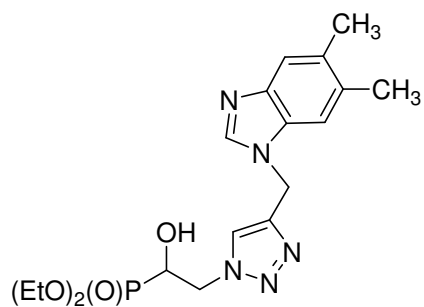

*Diethyl 2-[4-[(5,6-dimethylbenzoimidazol-1-yl)methyl]-1H-1,2,3-triazol-1-yl]-1-hydroxyethylphosphonate* **24j**.

Yellow oil; IR (film):  $\nu = 3131, 2990, 2945, 1217, 1048, 757 \text{ cm}^{-1}$ ;  $^1\text{H NMR}$  (600 MHz,  $\text{CDCl}_3$ ):  $\delta = 7.91$  (s, 1H); 7.76 (s, 1H); 7.43 (s, 1H); 7.23 (s, 1H); 5.38 (AB,  $J = 15.7$  Hz, 1H,  $\text{CH}_a\text{H}_b$ ); 5.34 (AB,  $J = 15.7$  Hz, 1H,  $\text{CH}_a\text{H}_b$ ); 4.82 (ddd,  $J = 14.2$  Hz,  $J = 4.9$  Hz,  $J = 2.5$  Hz, 1H,  $\text{PCCCH}_a\text{H}_b$ ); 4.46 (ddd,  $J = 14.2$  Hz,  $J = 9.9$  Hz,  $J = 5.3$  Hz, 1H,  $\text{PCCCH}_a\text{H}_b$ ); 4.31 (dt,  $J = 9.9$  Hz,  $J = 5.2$  Hz, 1H,  $\text{PCH(OH)}$ ); 4.12–4.06 (m, 4H,  $2 \times \text{POCH}_2\text{CH}_3$ ); 2.34 (s, 3H,  $\text{CH}_3$ ); 2.33 (s, 3H,  $\text{CH}_3$ ); 1.32 (t,  $J = 7.0$  Hz, 3H,  $\text{POCH}_2\text{CH}_3$ ); 1.30 (t,  $J = 7.0$  Hz, 3H,  $\text{POCH}_2\text{CH}_3$ );  $^{13}\text{C NMR}$  (151 MHz,  $\text{CDCl}_3$ ):  $\delta = 142.1$ ; 141.5; 141.2; 132.7; 131.7; 131.6; 124.5; 119.6; 110.1; 66.6 (d,  $J = 166.1$  Hz, PC); 63.4 (d,  $J = 7.1$  Hz, POC); 63.2 (d,  $J = 7.1$  Hz, POC); 51.7 (d,  $J = 9.6$  Hz, PCC); 40.2; 20.7; 20.4; 16.7 (d,  $J = 5.4$  Hz, POCC);  $^{31}\text{P NMR}$  (243 MHz,  $\text{CDCl}_3$ ):  $\delta = 21.28$  ppm. Anal. Calcd. for  $\text{C}_{18}\text{H}_{26}\text{N}_5\text{O}_4\text{P}$ : C, 53.07; H, 6.43; N, 17.19. Found: C, 52.88; H, 6.17; N, 17.05.

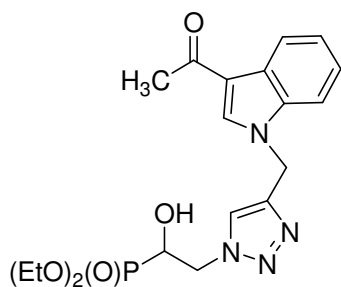

Diethyl 2-{4-[(3-acetylindol-1-yl)methyl]-1H-1,2,3-triazol-1-yl}-1-hydroxyethylphosphonate **24k**. Colourless oil; IR (film):  $\nu = 3266, 2959, 2911, 1642, 1528, 1390, 1217, 1024, 754 \text{ cm}^{-1}$ ;  $^1\text{H}$  NMR (300 MHz,  $\text{CDCl}_3$ ):  $\delta = 8.36\text{--}8.26$  (m, 1H); 7.84 (s, 1H,  $\text{HC5}'$ ); 7.62 (s, 1H); 7.43–7.35 (m, 1H); 7.30–7.23 (m, 2H); 5.46 (AB,  $J = 15.4 \text{ Hz}$ , 1H,  $\text{CH}_a\text{H}_b$ ); 5.44 (AB,  $J = 15.4 \text{ Hz}$ , 1H,  $\text{CH}_a\text{H}_b$ ); 4.77 (ddd,  $J = 14.3 \text{ Hz}$ ,  $J = 6.0 \text{ Hz}$ ,  $J = 2.6 \text{ Hz}$ , 1H,  $\text{PCCH}_a\text{H}_b$ ); 4.44 (ddd,  $J = 14.3 \text{ Hz}$ ,  $J = 10.0 \text{ Hz}$ ,  $J = 5.6 \text{ Hz}$ , 1H,  $\text{PCCH}_a\text{H}_b$ ); 4.21 (ddd,  $J = 10.0 \text{ Hz}$ ,  $J = 7.9 \text{ Hz}$ ,  $J = 2.6 \text{ Hz}$ , 1H,  $\text{PCH}(\text{OH})$ ); 4.14–4.06 (m, 4H,  $2 \times \text{POCH}_2\text{CH}_3$ ); 3.85 (brs, 1H, OH); 2.51 (s, 3H,  $\text{CH}_3$ ); 1.29 (t,  $J = 6.8 \text{ Hz}$ , 6H,  $2 \times \text{POCH}_2\text{CH}_3$ );  $^{13}\text{C}$  NMR (75.5 MHz,  $\text{CDCl}_3$ ):  $\delta = 193.2$  (s,  $\text{C}=\text{O}$ ); 142.6; 136.6; 135.0; 126.4; 124.2; 123.6; 122.8; 122.7; 117.5; 110.0; 66.2 (d,  $J = 159.3 \text{ Hz}$ , PC); 63.4 (d,  $J = 7.0 \text{ Hz}$ , POC); 63.3 (d,  $J = 7.0 \text{ Hz}$ , POC); 51.9 (d,  $J = 9.7 \text{ Hz}$ , PCC); 42.4; 27.7 (s,  $\text{CH}_3$ ); 16.6 (d,  $J = 5.4 \text{ Hz}$ , POCC); 16.5 (d,  $J = 5.4 \text{ Hz}$ , POCC);  $^{31}\text{P}$  NMR (121.5 MHz,  $\text{CDCl}_3$ ):  $\delta = 21.03 \text{ ppm}$ . Anal. Calcd. for  $\text{C}_{19}\text{H}_{25}\text{N}_4\text{O}_5\text{P}$ : C, 54.28; H, 5.99; N, 13.33. Found: C, 54.10; H, 6.12; N, 13.20.

### $^1\text{H}$ NMR

SpinWorks 3: ieg6412h

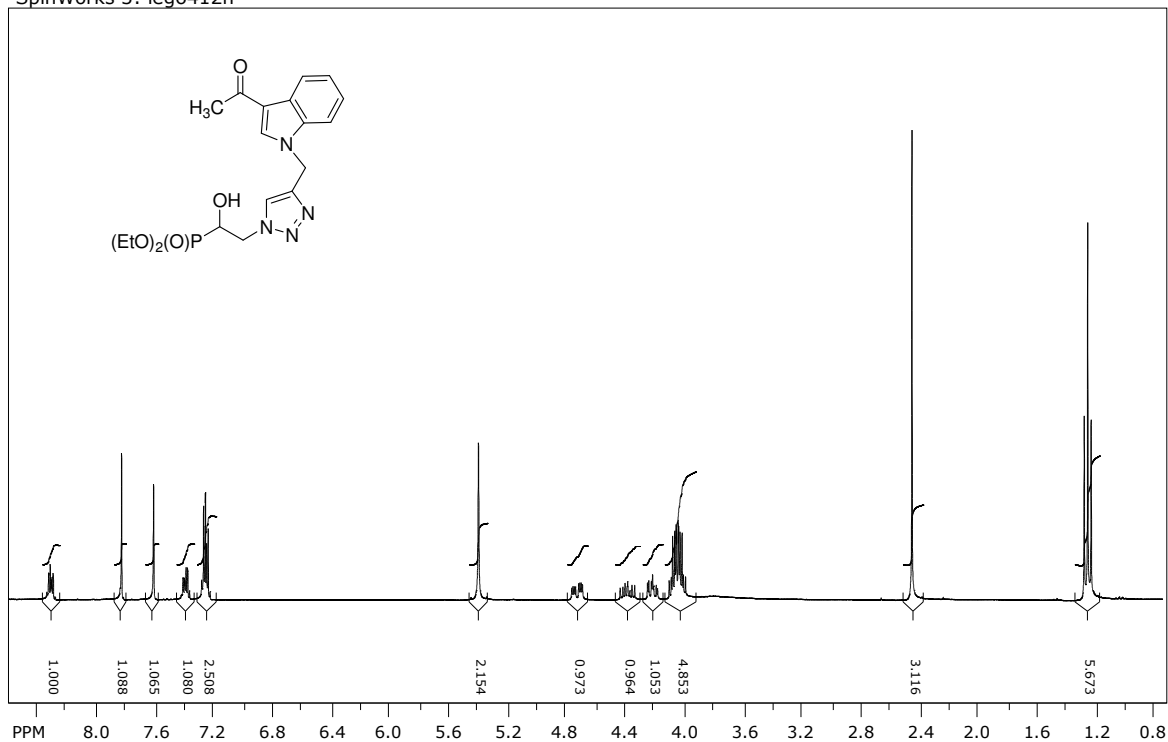

file: ...NMR-widma\NMR\IEG\ieg6412h.fid\fid block# 1 expt: "s2pul"  
 transmitter freq.: 300.063051 MHz  
 time domain size: 52032 points  
 width: 6500.00 Hz = 21.6621 ppm = 0.124923 Hz/pt  
 number of scans: 12

freq. of 0 ppm: 300.060201 MHz  
 processed size: 65536 complex points  
 LB: 0.000 GF: 0.0000  
 Hz/cm: 94.470 ppm/cm: 0.31483

# <sup>13</sup>C NMR

SpinWorks 3: ieg6412C

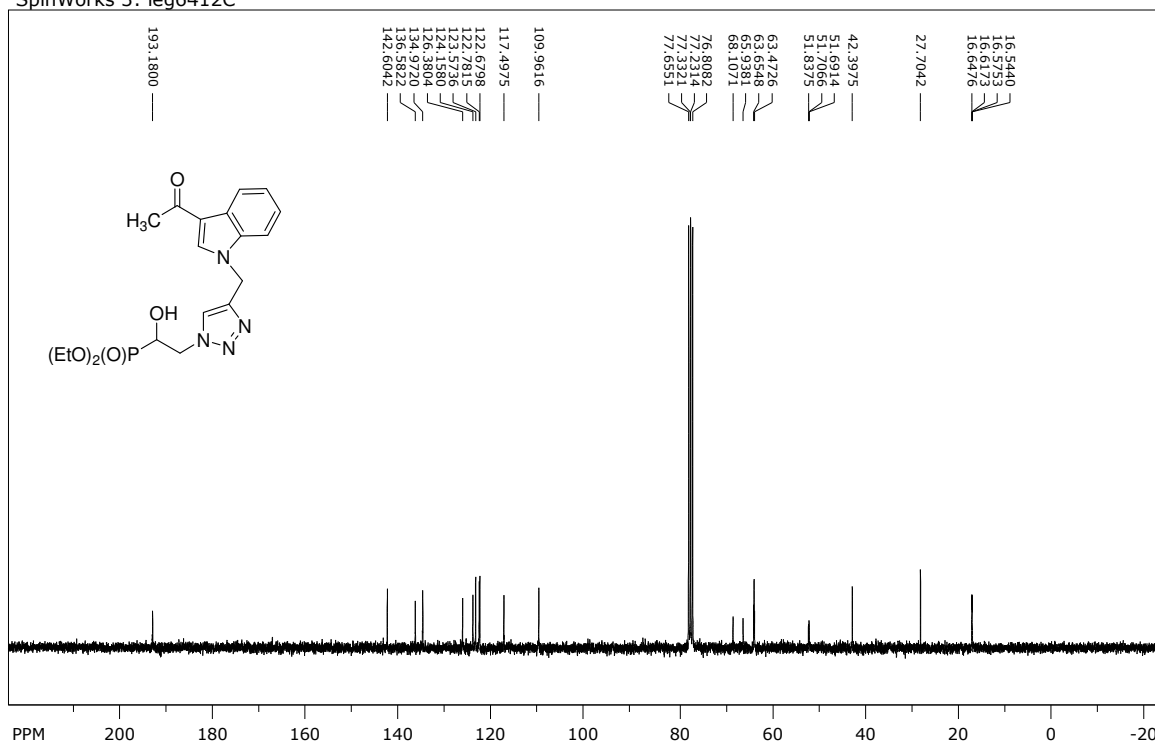

file: ...NMR-widma\NMR\IEG\ieg6412C.fid\fid block# 1 expt: "s2pul"  
transmitter freq.: 75.457729 MHz  
time domain size: 68096 points  
width: 18761.73 Hz = 248.6389 ppm = 0.275519 Hz/pt  
number of scans: 5000

freq. of 0 ppm: 75.450189 MHz  
processed size: 131072 complex points  
LB: 1.000 GF: 0.0000  
Hz/cm: 750.469 ppm/cm: 9.94556

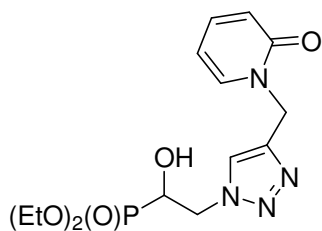

*Diethyl 1-hydroxy-2-[4-[(2-oxopyridin-1-yl)methyl]-1H-1,2,3-triazol-1-yl]ethylphosphonate* **241**. Brown oil; IR (film):  $\nu = 3274, 2984, 2831, 1673, 1027 \text{ cm}^{-1}$ ;  $^1\text{H}$  NMR (300 MHz,  $\text{CDCl}_3$ ):  $\delta = 8.03$  (s, 1H); 7.64 (ddd,  $J = 6.7 \text{ Hz}, J = 2.0 \text{ Hz}, J = 0.6 \text{ Hz}$ , 1H); 7.36 (ddd,  $J = 9.2 \text{ Hz}, J = 6.7 \text{ Hz}, J = 2.0 \text{ Hz}$ , 1H); 6.52 (dd,  $J = 9.2 \text{ Hz}, J = 0.6 \text{ Hz}$ , 1H); 6.22 (dt,  $J = 6.7 \text{ Hz}, J = 1.3 \text{ Hz}$ , 1H); 5.20 (AB,  $J = 14.3 \text{ Hz}$ , 1H,  $\text{CH}_a\text{H}_b$ ); 5.12 (AB,  $J = 14.3 \text{ Hz}$ , 1H,  $\text{CH}_a\text{H}_b$ ); 4.79 (ddd,  $J = 14.2 \text{ Hz}, J = 5.0 \text{ Hz}, J = 2.6 \text{ Hz}$ , 1H,  $\text{PCCH}_a\text{H}_b$ ); 4.51 (ddd,  $J = 14.2 \text{ Hz}, J = 10.0 \text{ Hz}, J = 5.0 \text{ Hz}$ , 1H,  $\text{PCCH}_a\text{H}_b$ ); 4.36 (ddd,  $J = 10.0 \text{ Hz}, J = 8.9 \text{ Hz}, J = 2.6 \text{ Hz}$ , 1H,  $\text{PCH}(\text{OH})$ ); 4.26–4.14 (m, 4H,  $2 \times \text{POCH}_2\text{CH}_3$ ); 2.56 (brs, 1H, OH); 1.35 (t,  $J = 7.0 \text{ Hz}$ , 3H,  $\text{POCH}_2\text{CH}_3$ ); 1.33 (t,  $J = 6.9 \text{ Hz}$ , 3H,  $\text{POCH}_2\text{CH}_3$ );  $^{13}\text{C}$  NMR (75.5 MHz,  $\text{CDCl}_3$ ):  $\delta = 162.3$  (s,  $\text{C}=\text{O}$ ); 141.9 (s,  $\text{HC}=\text{C}$ ); 140.2; 137.8; 125.6 (s,  $\text{HC}=\text{C}$ ); 120.2; 106.9; 66.7 (d,  $J = 164.9 \text{ Hz}$ , PC); 63.3 (d,  $J = 7.1 \text{ Hz}$ , POC); 63.2 (d,  $J = 7.1 \text{ Hz}$ , POC); 51.8 (d,  $J = 10.4 \text{ Hz}$ , PCC); 44.5; 16.5 (d,  $J = 5.2 \text{ Hz}$ , POCC);  $^{31}\text{P}$  NMR (121.5 MHz,  $\text{CDCl}_3$ ):  $\delta = 21.29$  ppm. Anal. Calcd. for  $\text{C}_{14}\text{H}_{21}\text{N}_4\text{O}_5\text{P}$ : C, 47.19; H, 5.94; N, 15.72. Found: C, 47.01; H, 6.10; N, 15.80.

### $^1\text{H}$ NMR

SpinWorks 3: ieg6839h

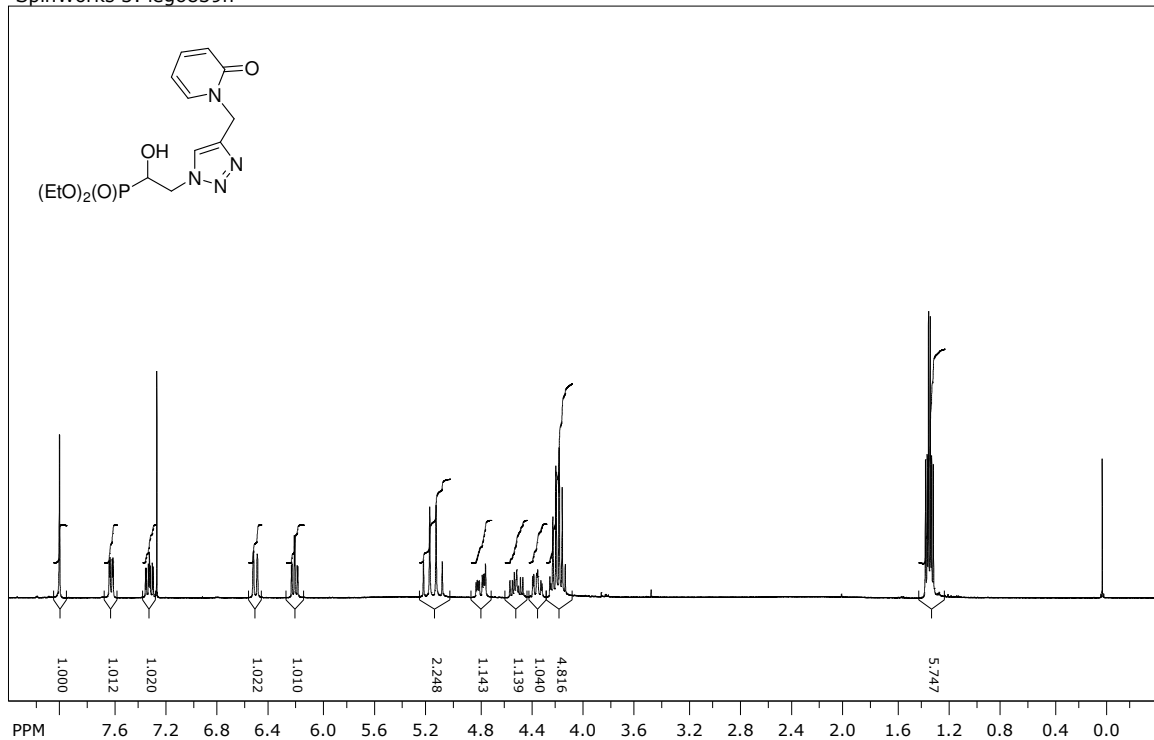

file: ...NMR-widma\NMR\IEG\ieg6839h.fid\fid block# 1 expt: "s2pul"  
 transmitter freq.: 300.063051 MHz  
 time domain size: 52032 points  
 width: 6500.00 Hz = 21.6621 ppm = 0.124923 Hz/pt  
 number of scans: 16

freq. of 0 ppm: 300.060195 MHz  
 processed size: 65536 complex points  
 LB: 0.000 GF: 0.0000  
 Hz/cm: 106.486 ppm/cm: 0.35488

# <sup>13</sup>C NMR

SpinWorks 3: ieg6836C

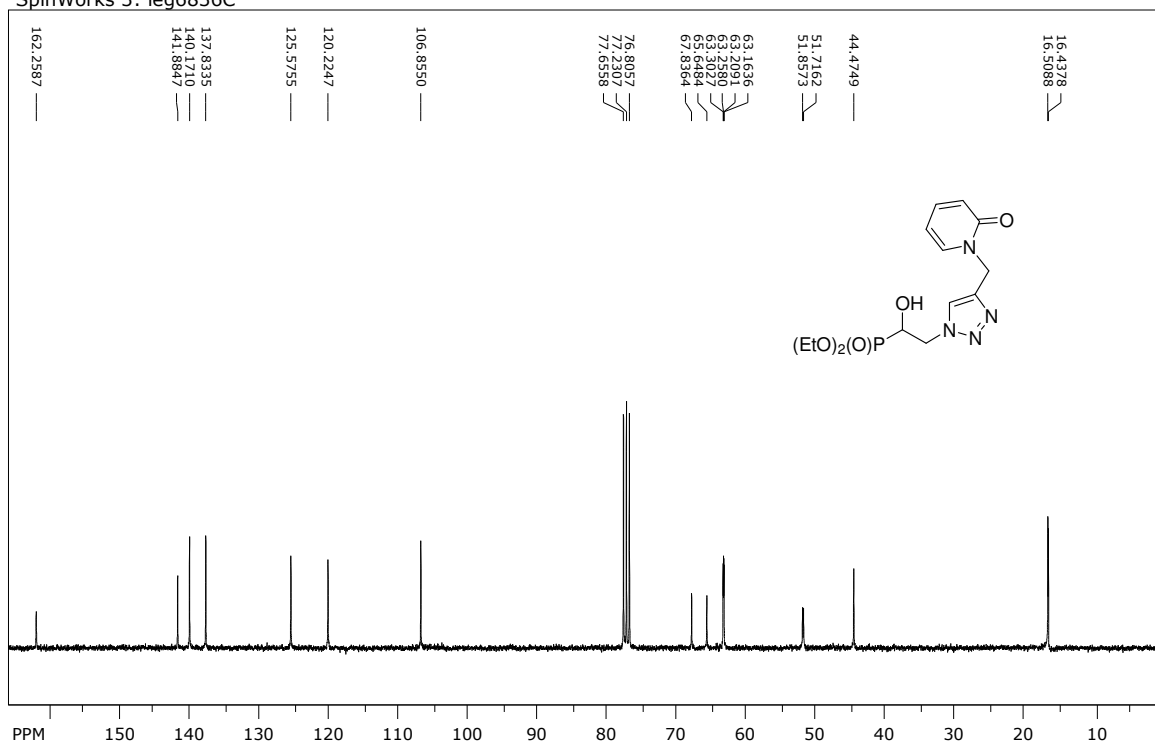

file: ...NMR-widma\NMR\IEG\ieg6836C.fid\fid block# 1 expt: "s2pul"  
transmitter freq.: 75.457729 MHz  
time domain size: 68096 points  
width: 18761.73 Hz = 248.6389 ppm = 0.275519 Hz/pt  
number of scans: 768

freq. of 0 ppm: 75.450200 MHz  
processed size: 131072 complex points  
LB: 1.000 GF: 0.0000  
Hz/cm: 501.708 ppm/cm: 6.64886

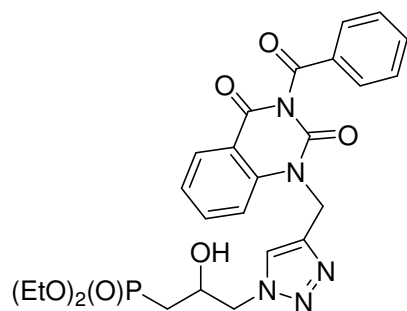

*Diethyl 3-(4-[[3-benzoyl-2,4-dioxypyrimidin-1-yl]methyl]-1H-1,2,3-triazol-1-yl)-2-hydroxyethylphosphonate* **25e**.

White solid; m.p.: 75–77°C; IR (KBr):  $\nu = 3386, 3054, 2988, 2851, 1754, 1709, 1658, 1224, 1025, 795, 694 \text{ cm}^{-1}$ ;  $^1\text{H}$  NMR (300 MHz,  $\text{CDCl}_3$ ):  $\delta = 8.17$  (dd,  $J = 7.9 \text{ Hz}, J = 1.5 \text{ Hz}, 1\text{H}$ ); 7.97–7.93 (m, 2H, 2 $\times$ *o*-CH); 7.87 (brd,  $J = 8.4 \text{ Hz}, 1\text{H}$ ); 7.85 (s, 1H, *HC5'*); 7.75 (ddd,  $J = 8.4 \text{ Hz}, J = 7.9 \text{ Hz}, J = 1.5 \text{ Hz}, 1\text{H}$ ); 7.67–7.61 (m, 1H, *p*-CH); 7.51–7.45 (m, 2H, 2 $\times$ *m*-CH); 7.29 (dt,  $J = 7.9 \text{ Hz}, J = 0.5 \text{ Hz}, 1\text{H}$ ); 5.44 (AB,  $J = 14.2 \text{ Hz}, 1\text{H}, \text{CH}_a\text{H}_b$ ); 5.36 (AB,  $J = 14.2 \text{ Hz}, 1\text{H}, \text{CH}_a\text{H}_b$ ); 4.45 (dd,  $J = 15.4 \text{ Hz}, J = 6.5 \text{ Hz}, 1\text{H}, \text{PCCCH}_a\text{H}_b$ ); 4.44–4.32 (m, 2H,  $\text{PCCHCH}_a\text{H}_b$ ); 4.14–4.01 (m, 4H, 2 $\times$  $\text{POCH}_2\text{CH}_3$ ); 3.40 (brs, 1H, OH); 1.96 (ddd,  $J = 19.2 \text{ Hz}, J = 15.1 \text{ Hz}, J = 3.3 \text{ Hz}, 1\text{H}, \text{PCH}_a\text{H}_b$ ); 1.73 (ddd,  $J = 16.4 \text{ Hz}, J = 15.1 \text{ Hz}, J = 9.1 \text{ Hz}, 1\text{H}, \text{PCH}_a\text{H}_b$ ); 1.30 (t,  $J = 7.0 \text{ Hz}, 3\text{H}, \text{POCH}_2\text{CH}_3$ ); 1.27 (t,  $J = 7.0 \text{ Hz}, 3\text{H}, \text{POCH}_2\text{CH}_3$ );  $^{13}\text{C}$  NMR (75.5 MHz,  $\text{CDCl}_3$ ):  $\delta = 168.6$  (s, C=O); 161.0 (s, C=O); 149.5 (s, C=O); 142.3 (s, HC=C); 140.3; 136.3; 135.2; 131.6; 130.6; 129.3; 128.9; 125.4 (s, HC=C); 123.8; 115.6; 115.4; 65.5 (d,  $J = 4.0 \text{ Hz}, \text{PCC}$ ); 62.5 (d,  $J = 5.8 \text{ Hz}, \text{POC}$ ); 62.4 (d,  $J = 5.8 \text{ Hz}, \text{POC}$ ); 52.4 (d,  $J = 14.1 \text{ Hz}, \text{PCCC}$ ); 39.0; 30.0 (d,  $J = 140.4 \text{ Hz}, \text{PC}$ ); 16.6 (d,  $J = 5.2 \text{ Hz}, \text{POCC}$ );  $^{31}\text{P}$  NMR (121.5 MHz,  $\text{CDCl}_3$ ):  $\delta = 29.27$  ppm. Anal. Calcd. for  $\text{C}_{25}\text{H}_{28}\text{N}_5\text{O}_7\text{P}$ : C, 55.45; H, 5.21; N, 12.93. Found: C, 55.28; H, 5.15; N, 13.11.

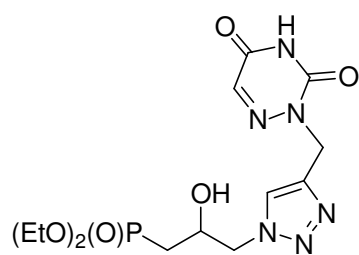

*Diethyl 3-{4-[(3,5-dioxo-1,2,4-triazin-2-yl)methyl]-1H-1,2,3-triazol-1-yl}-2-hydroxypropylphosphonate* **25f**. Colourless oil;

IR (film):  $\nu = 3302, 2986, 2913, 2833, 1730, 1673, 1028, 970 \text{ cm}^{-1}$ ;  $^1\text{H}$  NMR (600 MHz,  $\text{CDCl}_3$ ):  $\delta = 11.80$  (s, 1H, NH); 7.89 (s, 1H); 7.46 (s, 1H); 5.25 (AB,  $J = 15.6 \text{ Hz}, 1\text{H}, \text{CH}_a\text{H}_b$ ); 5.19 (AB,  $J = 15.6 \text{ Hz}, 1\text{H}, \text{CH}_a\text{H}_b$ ); 4.55 (dd,  $J = 13.7 \text{ Hz}, J = 3.0 \text{ Hz}, 1\text{H}, \text{PCCCH}_a\text{H}_b$ ); 4.43 (dddd,  $J = 8.6 \text{ Hz}, J = 7.0 \text{ Hz}, J = 3.9 \text{ Hz}, J = 3.0 \text{ Hz}, 1\text{H}, \text{PCCH}(\text{OH})$ ); 4.38 (dd,  $J = 13.7 \text{ Hz}, J = 7.0 \text{ Hz}, 1\text{H}, \text{PCCCH}_a\text{H}_b$ ); 4.19–4.02 (m, 4H, 2 $\times$  $\text{POCH}_2\text{CH}_3$ ); 2.05 (ddd, 2H,  $J = 19.2 \text{ Hz}, J = 15.2 \text{ Hz}, J = 3.9 \text{ Hz}, \text{PCH}_a\text{H}_b$ ); 1.97 (ddd, 2H,  $J = 17.6 \text{ Hz}, J = 15.2 \text{ Hz}, J = 8.6 \text{ Hz}, \text{PCH}_a\text{H}_b$ ); 1.31 (t,  $J = 7.2 \text{ Hz}, 3\text{H}, \text{POCH}_2\text{CH}_3$ ); 1.30 (t,  $J = 7.2 \text{ Hz}, 3\text{H}, \text{POCH}_2\text{CH}_3$ );  $^{13}\text{C}$  NMR (75.5 MHz,  $\text{CDCl}_3$ ):  $\delta = 156.0$  (s, C=O); 149.4 (C=O); 141.4 (s, HC=C); 135.1 (s, HC=N); 125.7 (s, HC=C); 65.6 (s, PCC); 62.7 (d,  $J = 6.3 \text{ Hz}, \text{POC}$ ); 62.4 (d,  $J = 6.3 \text{ Hz}, \text{POC}$ ); 56.2 (d,  $J = 16.6 \text{ Hz}, \text{PCCC}$ ); 34.8; 31.0 (d,  $J = 140.9 \text{ Hz}, \text{PC}$ ); 16.6 (d,  $J = 6.0 \text{ Hz},$



POCC);  $^{31}\text{P}$  NMR (243 MHz,  $\text{CDCl}_3$ ):  $\delta = 29.38$  ppm. Anal. Calcd. for  $\text{C}_{13}\text{H}_{21}\text{N}_6\text{O}_6\text{P}$ : C, 40.21; H, 5.45; N, 21.64. Found: C, 40.08; H, 5.59; N, 21.72.

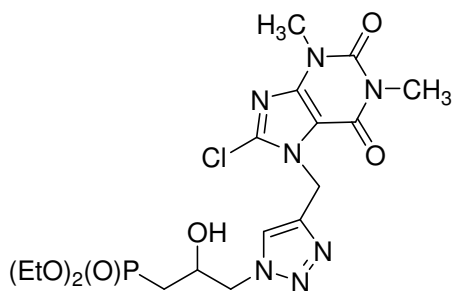

Diethyl 3-[4-[(8-chloro-1,3-dimethyl-2,6-dioxopurin-7-yl)methyl]-1H-1,2,3-triazol-1-yl]-2-hydroxypropylphosphonate **25g**. White solid; m.p.: 137–

139°C; IR (KBr):  $\nu = 3354, 3151, 2983, 2928, 1702, 1675, 1221, 1027 \text{ cm}^{-1}$ ;  $^1\text{H NMR}$  (300 MHz,  $\text{CDCl}_3$ ):  $\delta = 7.93$  (s, 1H,  $\text{HC5}'$ ); 5.63 (s, 2H,  $\text{CH}_2$ ); 4.53–4.33 (m, 3H,  $\text{PCCCH}_2$ ); 4.17–4.03 (m, 4H,  $2 \times \text{POCH}_2\text{CH}_3$ ); 3.52 (s, 3H,  $\text{CH}_3$ ); 3.38 (s, 3H,  $\text{CH}_3$ ); 1.98 (ddd,  $J = 19.0 \text{ Hz}, J = 15.3 \text{ Hz}, J = 3.1 \text{ Hz}$ , 1H,  $\text{PCH}_d\text{H}_b$ ); 1.77 (ddd,  $J = 16.8 \text{ Hz}, J = 15.3 \text{ Hz}, J = 9.2 \text{ Hz}$ , 1H,  $\text{PCH}_a\text{H}_b$ ); 1.32 (t,  $J = 7.0 \text{ Hz}$ , 3H,  $\text{POCH}_2\text{CH}_3$ ); 1.31 (t,  $J = 7.0 \text{ Hz}$ , 3H,  $\text{POCH}_2\text{CH}_3$ );  $^{13}\text{C NMR}$  (75.5 MHz,  $\text{CDCl}_3$ ):  $\delta = 154.3$  (s,  $\text{C}=\text{O}$ ); 151.1 (s,  $\text{C}=\text{O}$ ); 147.2;

141.4; 138.9; 125.2; 107.4; 65.4 (d,  $J = 3.7 \text{ Hz}$ , PCC); 62.4 (d,  $J = 6.5 \text{ Hz}$ , POC); 62.3 (d,  $J = 6.5 \text{ Hz}$ , POC); 56.0 (d,  $J = 18.4 \text{ Hz}$ , PCCC); 41.1; 30.8 (d,  $J = 135.9 \text{ Hz}$ , PC); 30.0; 28.2; 16.6 (d,  $J = 5.7 \text{ Hz}$ , POCC); 16.5 (d,  $J = 5.7 \text{ Hz}$ , POCC);  $^{31}\text{P NMR}$  (121.5 MHz,  $\text{CDCl}_3$ ):  $\delta = 28.72$  ppm. Anal. Calcd. for  $\text{C}_{17}\text{H}_{25}\text{ClN}_7\text{O}_6\text{P}$ : C, 41.68; H, 5.14; N, 20.02. Found: C, 41.67; H, 5.08; N, 19.90.

$^1\text{H NMR}$

SpinWorks 3: ieg6377H

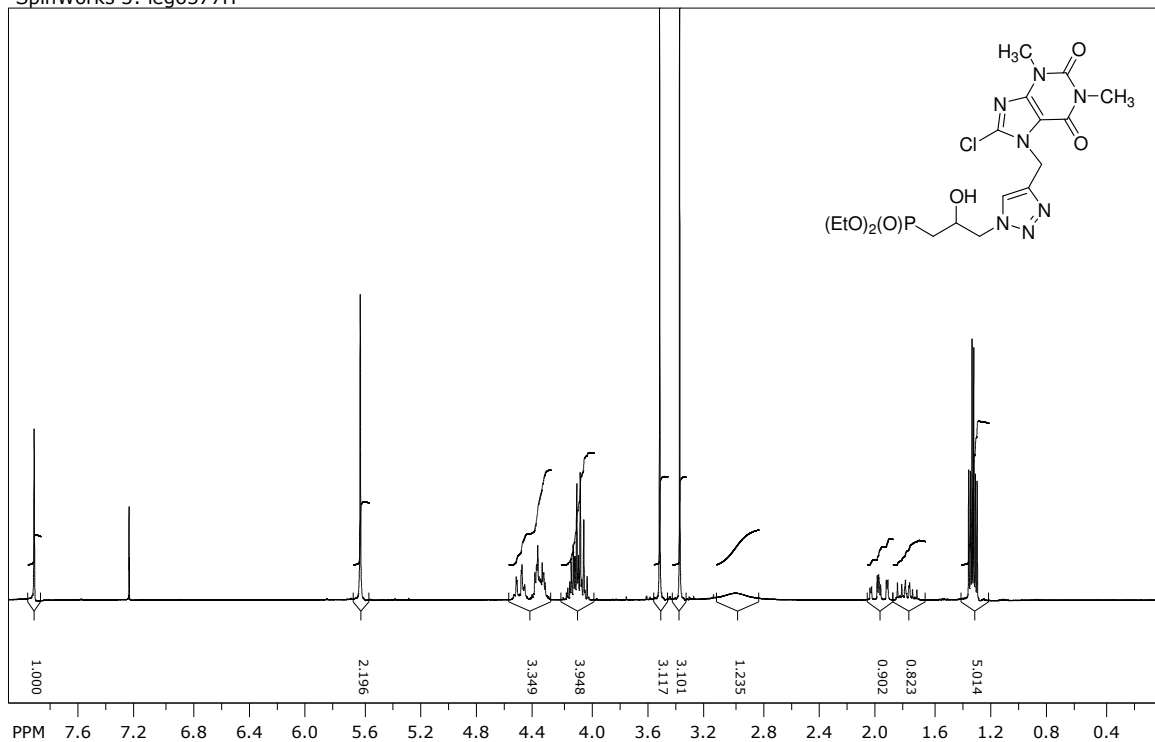

file: ...NMR-widma\NMR\IEG\ieg6377H.fid\fid block# 1 expt: "s2pul"  
 transmitter freq.: 300.063051 MHz  
 time domain size: 52032 points  
 width: 6500.00 Hz = 21.6621 ppm = 0.124923 Hz/pt  
 number of scans: 16

freq. of 0 ppm: 300.060201 MHz  
 processed size: 65536 complex points  
 LB: 0.000 GF: 0.0000  
 Hz/cm: 97.578 ppm/cm: 0.32519

# <sup>13</sup>C NMR

SpinWorks 3: ieg6377C

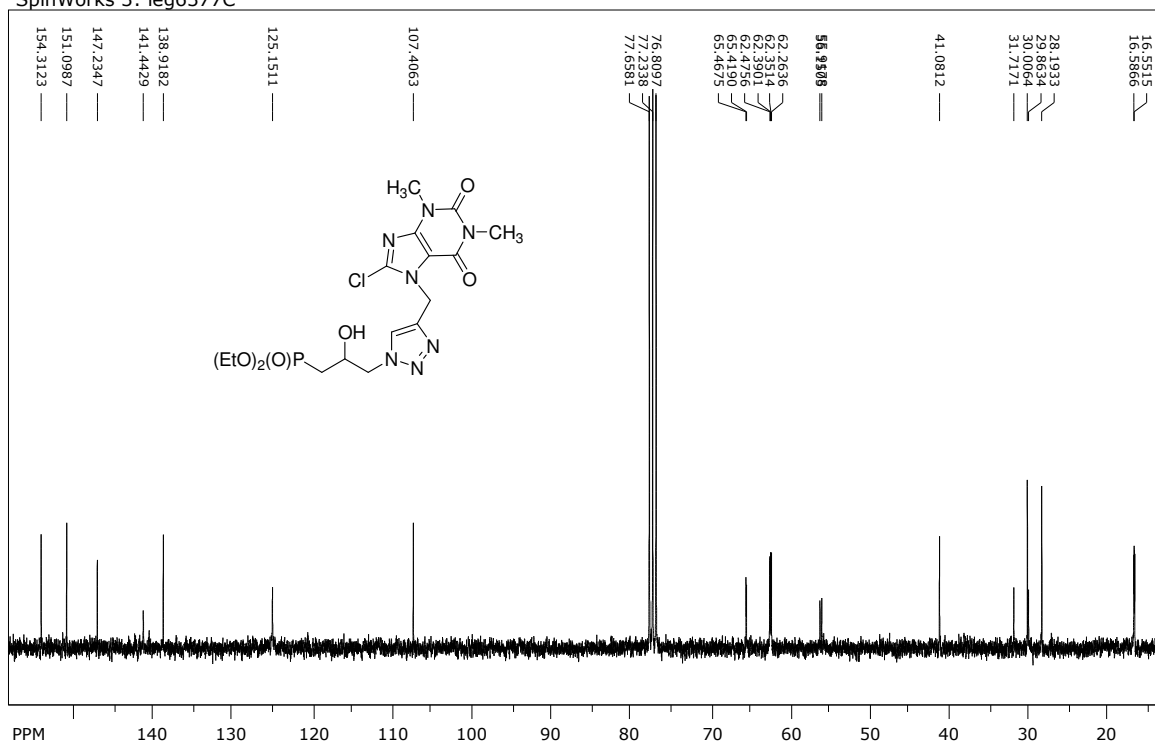

file: ...NMR-widma\NMR\IEG\ieg6377C.fid\fid block# 1 expt: "s2pul"  
transmitter freq.: 75.457729 MHz  
time domain size: 68096 points  
width: 18761.73 Hz = 248.6389 ppm = 0.275519 Hz/pt  
number of scans: 1044

freq. of 0 ppm: 75.450193 MHz  
processed size: 131072 complex points  
LB: 1.000 GF: 0.0000  
Hz/cm: 438.920 ppm/cm: 5.81676

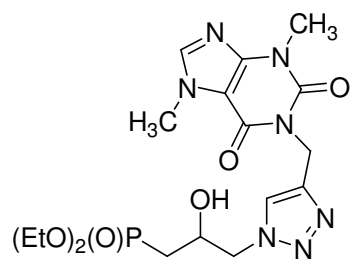

Diethyl 3-{4-[(3,7-dimethyl-2,6-dioxopurin-1-yl)methyl]-1H-1,2,3-triazol-1-yl}-2-hydroxypropylphosphonate **25h**. White powder; m.p.: 148–150°C; IR (KBr):  $\nu = 3445, 2984, 2924, 1707, 1664, 1231, 1025 \text{ cm}^{-1}$ ;  $^1\text{H NMR}$  (300 MHz,  $\text{CDCl}_3$ ):  $\delta = 7.78$  (s, 1H); 7.51 (d,  $J = 0.6$  Hz, 1H,  $\text{HC5}'$ ); 5.30 (s, 2H,  $\text{CH}_2$ ); 4.52–4.32 (m, 3H,  $\text{PCCCHCH}_2$ ); 4.17–4.03 (m, 4H,  $2 \times \text{POCH}_2\text{CH}_3$ ); 3.98 (d,  $J = 0.6$  Hz, 3H,  $\text{CH}_3$ ); 3.55 (s, 3H,  $\text{CH}_3$ ); 3.02 (brs, 1H, OH); 2.46–2.34 (m, 2H,  $\text{PCH}_2$ ); 1.30 (t,  $J = 7.0$  Hz, 3H,  $\text{POCH}_2\text{CH}_3$ ); 1.28 (t,  $J = 7.0$  Hz, 3H,  $\text{POCH}_2\text{CH}_3$ );  $^{13}\text{C NMR}$  (75.5 MHz,  $\text{CDCl}_3$ ):  $\delta = 154.8$  (s,  $\text{C=O}$ ); 151.3 (s,  $\text{C=O}$ ); 148.9; 143.5; 141.7; 124.9; 107.7; 65.6 (d,  $J = 3.8$  Hz, PCC); 62.5 (d,  $J = 6.4$  Hz, POC); 62.4 (d,  $J = 6.4$  Hz, POC); 55.8 (d,  $J = 15.3$  Hz, PCCC); 36.2; 33.9; 32.0 (d,  $J = 292.9$  Hz, PC); 31.7; 30.0; 16.6 (d,  $J = 5.6$  Hz, POCC); 16.5 (d,  $J = 5.6$  Hz, POCC);  $^{31}\text{P NMR}$  (121.5 MHz,  $\text{CDCl}_3$ ):  $\delta = 29.53$  ppm. Anal. Calcd. for  $\text{C}_{17}\text{H}_{26}\text{N}_7\text{O}_6\text{P}$ : C, 44.84; H, 5.75; N, 21.53. Found: C, 44.70; H, 5.59; N, 21.60.

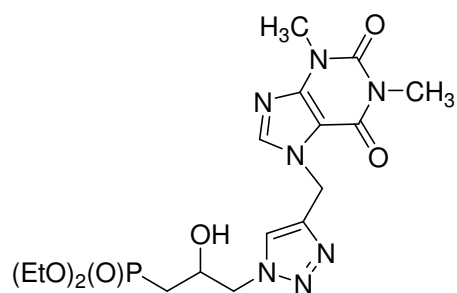

*Diethyl 3-[4-[(1,3-dimethyl-2,6-dioxopurin-7-yl)methyl]-1H-1,2,3-triazol-1-yl]-2-hydroxypropylphosphonate* **25i**. White solid; m.p.: 132–133°C; IR (KBr):  $\nu = 2994, 2989, 2930, 1701, 1663, 1245, 1033 \text{ cm}^{-1}$ ;  $^1\text{H NMR}$  (300 MHz,  $\text{CDCl}_3$ ):  $\delta = 7.97$  (s, 1H); 7.81 (s, 1H,  $\text{HC5}'$ ); 5.58 (s, 2H,  $\text{CH}_2$ ); 4.55–4.39 (m, 3H,  $\text{PCCCHCH}_2$ ); 4.18–4.04 (m, 4H,  $2 \times \text{POCH}_2\text{CH}_3$ ); 3.55 (s, 3H,  $\text{CH}_3$ ); 3.38 (s, 3H,  $\text{CH}_3$ ); 2.46–2.34 (m, 2H,  $\text{PCH}_2$ ); 1.31 (t,  $J = 7.0 \text{ Hz}$ , 3H,  $\text{POCH}_2\text{CH}_3$ ); 1.28 (t,  $J = 7.0 \text{ Hz}$ , 3H,  $\text{POCH}_2\text{CH}_3$ );  $^{13}\text{C NMR}$  (75.5 MHz,  $\text{CDCl}_3$ ):  $\delta = 155.2$  (s,  $\text{C=O}$ ); 151.5 (s,  $\text{C=O}$ ); 148.8; 141.9; 141.4; 125.3; 106.5; 65.5 (d,  $J = 3.8 \text{ Hz}$ ); 62.4 (d,  $J = 6.6 \text{ Hz}$ ,  $\text{POC}$ ); 62.2 (d,  $J = 6.6 \text{ Hz}$ ,  $\text{POC}$ ); 56.1 (d,  $J = 17.2 \text{ Hz}$ ,  $\text{PCCC}$ ); 41.6; 31.8; 29.0 (d,  $J = 136.6 \text{ Hz}$ ,  $\text{PC}$ ); 16.6 (d,  $J = 6.0 \text{ Hz}$ ,  $\text{POCC}$ ); 16.5 (d,  $J = 6.0 \text{ Hz}$ ,  $\text{POCC}$ );  $^{31}\text{P NMR}$  (121.5 MHz,  $\text{CDCl}_3$ ):  $\delta = 29.34 \text{ ppm}$ . Anal. Calcd. for  $\text{C}_{17}\text{H}_{26}\text{N}_7\text{O}_6\text{P}$ : C, 44.84; H, 5.75; N, 21.53. Found: C, 45.00; H, 5.92; N, 21.41.

## $^1\text{H NMR}$

SpinWorks 3: ieg6402H

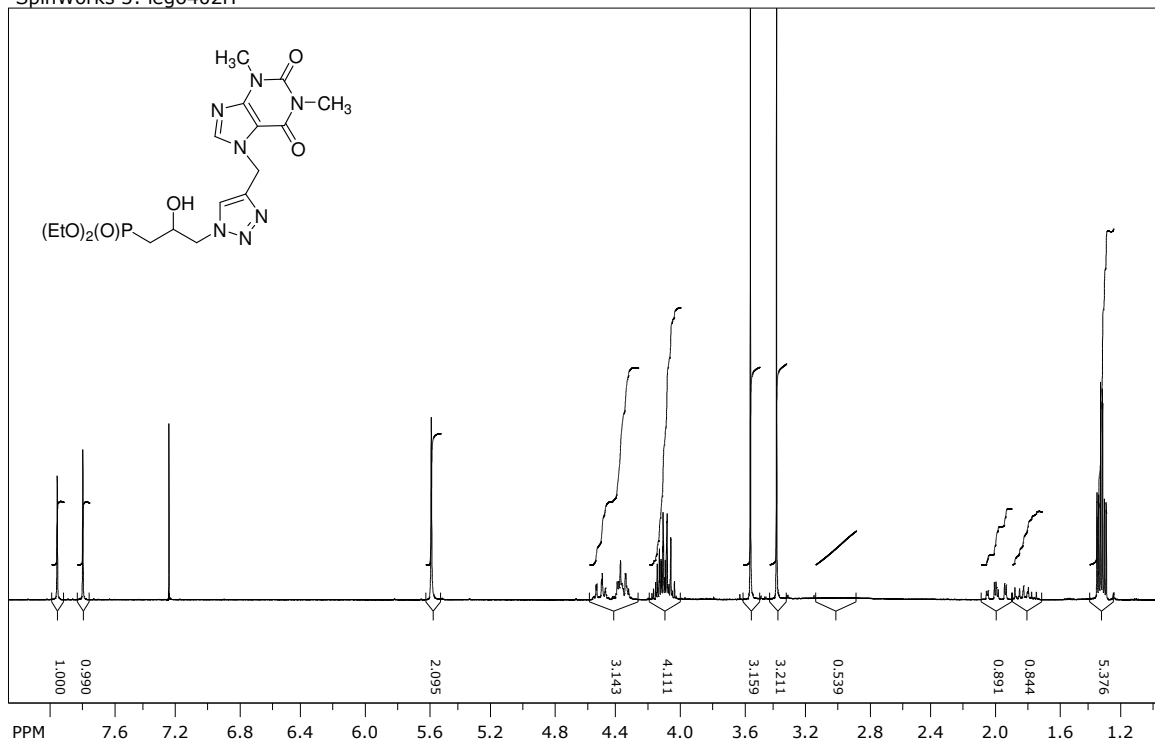

file: ...NMR-widma\NMR\IEG\ieg6402H.fid\fid block# 1 expt: "s2pul"  
 transmitter freq.: 300.063051 MHz  
 time domain size: 52032 points  
 width: 6500.00 Hz = 21.6621 ppm = 0.124923 Hz/pt  
 number of scans: 16

freq. of 0 ppm: 300.060201 MHz  
 processed size: 65536 complex points  
 LB: 0.000 GF: 0.0000  
 Hz/cm: 88.255 ppm/cm: 0.29412

# <sup>13</sup>C NMR

SpinWorks 3: ieg6400C

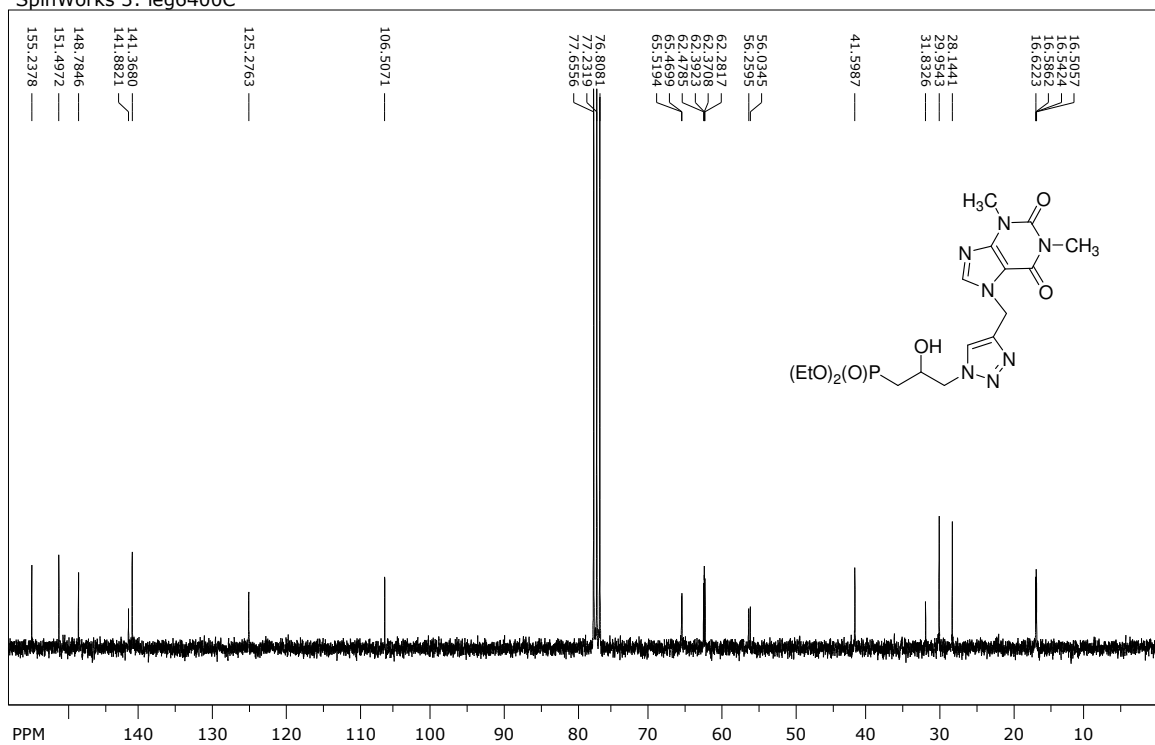

file: ...NMR-widma\NMR\IEG\ieg6400C.fid\fid block# 1 expt: "s2pul"  
transmitter freq.: 75.457729 MHz  
time domain size: 68096 points  
width: 18761.73 Hz = 248.6389 ppm = 0.275519 Hz/pt  
number of scans: 2000

freq. of 0 ppm: 75.450191 MHz  
processed size: 131072 complex points  
LB: 1.000 GF: 0.0000  
Hz/cm: 480.779 ppm/cm: 6.37150

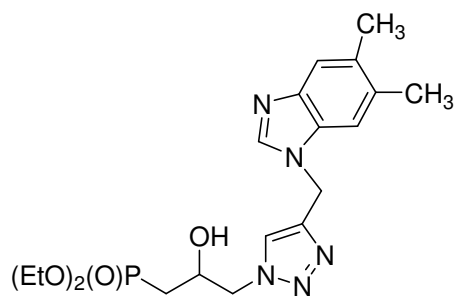

*Diethyl 3-[4-[(5,6-dimethylbenzoimidazol-1-yl)methyl]-1H-1,2,3-triazol-1-yl]-2-hydroxypropylphosphonate* **25j**. Yellow oil; IR (film):  $\nu = 3339, 3140, 2982, 2935, 1222, 1048, 965, 838 \text{ cm}^{-1}$ ;  $^1\text{H}$  NMR (300 MHz,  $\text{CDCl}_3$ ):  $\delta = 7.83$  (s, 1H); 7.61 (s, 1H); 7.49 (s, 1H); 7.20 (s, 1H); 5.36 (s, 2H,  $\text{CH}_2$ ); 4.53–4.47 (m, 1H,  $\text{PCCCH}_a\text{H}_b$ );

4.42–4.28 (m, 2H,  $\text{PCCHCH}_a\text{H}_b$ ); 4.15–4.05 (m, 4H,  $2 \times \text{POCH}_2\text{CH}_3$ ); 3.63 (brs, 1H, OH); 2.34 (s, 3H,  $\text{CH}_3$ ); 2.33 (s, 3H,  $\text{CH}_3$ ); 2.04–1.75 (m, 2H,  $\text{PCH}_2$ ); 1.30 (t,  $J = 7.0$  Hz, 3H,  $\text{POCH}_2\text{CH}_3$ ); 1.28 (t,  $J = 7.0$  Hz, 3H,  $\text{POCH}_2\text{CH}_3$ );  $^{13}\text{C}$  NMR (75.5 MHz,  $\text{CDCl}_3$ ):  $\delta = 142.5$ ; 141.9; 141.5; 132.7; 131.9; 131.6; 124.3; 119.8; 110.2; 65.3 (d,  $J = 3.4$  Hz, PCC); 62.4 (d,  $J = 6.3$  Hz, POC); 62.3 (d,  $J = 6.3$  Hz, POC); 56.3 (d,  $J = 16.0$  Hz, PCCC); 40.5; 31.1 (d,  $J = 139.8$  Hz, PC); 20.7; 20.4; 16.6 (d,  $J = 6.3$  Hz, POCC); 16.5 (d,  $J = 6.3$  Hz, POCC);  $^{31}\text{P}$  NMR (121.5 MHz,  $\text{CDCl}_3$ ):  $\delta = 28.53$  ppm. Anal. Calcd. for  $\text{C}_{19}\text{H}_{28}\text{N}_5\text{O}_4\text{P}$ : C, 54.15; H, 6.70; N, 16.62. Found: C, 53.98; H, 6.64; N, 16.56.

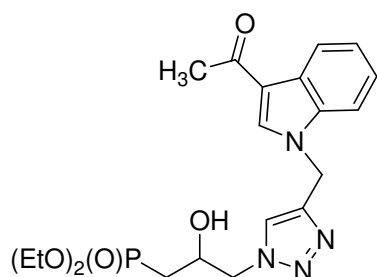

*Diethyl 3-[4-[(3-acetylidol-1-yl)methyl]-1H-1,2,3-triazol-1-yl]-2-hydroxypropylphosphonate* **25k**. Colourless oil; IR (film):  $\nu = 3352, 2984, 2924, 1799, 1528, 1391, 1025 \text{ cm}^{-1}$ ;  $^1\text{H}$  NMR (600 MHz,  $\text{CDCl}_3$ ):  $\delta = 8.40$ –8.34 (m, 1H); 7.88 (s, 1H,  $\text{HC5}'$ ); 7.65 (s, 1H); 7.47–7.41 (m, 1H); 7.33–7.28 (m, 2H); 5.46 (s, 2H,  $\text{CH}_2$ ); 4.54–4.47 (m, 1H,  $\text{PCCCH}_a\text{H}_b$ ); 4.40–4.32

(m, 2H,  $\text{PCCHCH}_a\text{H}_b$ ); 4.17–4.01 (m, 4H,  $2 \times \text{POCH}_2\text{CH}_3$ ); 2.49 (s, 3H,  $\text{CH}_3$ ); 1.97 (ddd,  $J = 19.3$  Hz,  $J = 15.2$  Hz,  $J = 3.2$  Hz, 1H,  $\text{PCH}_a\text{H}_b$ ); 1.77 (ddd,  $J = 16.6$  Hz,  $J = 15.2$  Hz,  $J = 9.0$  Hz, 1H,  $\text{PCH}_a\text{H}_b$ ); 1.32 (t,  $J = 6.9$  Hz, 3H,  $\text{POCH}_2\text{CH}_3$ ); 1.30 (t,  $J = 6.9$  Hz, 3H,  $\text{POCH}_2\text{CH}_3$ );  $^{13}\text{C}$  NMR (75.5 MHz,  $\text{CDCl}_3$ ):  $\delta = 193.2$  (s,  $\text{C}=\text{O}$ ); 142.6; 136.5; 135.0; 126.3; 124.1; 123.5; 122.7; 122.6; 117.4; 109.9; 65.4 (d,  $J = 3.7$  Hz, PCC); 62.4 (d,  $J = 6.4$  Hz, POC); 62.3 (d,  $J = 6.4$  Hz, POC); 56.1 (d,  $J = 17.2$  Hz, PCCC); 42.4; 30.8 (d,  $J = 140.0$  Hz, PC); 27.7 (s,  $\text{CH}_3$ ); 16.6 (d,  $J = 6.0$  Hz, POCC); 16.5 (d,  $J = 6.0$  Hz, POCC);  $^{31}\text{P}$  NMR (243 MHz,  $\text{CDCl}_3$ ):  $\delta = 28.12$  ppm. Anal. Calcd. for  $\text{C}_{20}\text{H}_{27}\text{N}_4\text{O}_5\text{P}$ : C, 55.29; H, 6.26; N, 12.90. Found: C, 55.04; H, 6.14; N, 13.06.

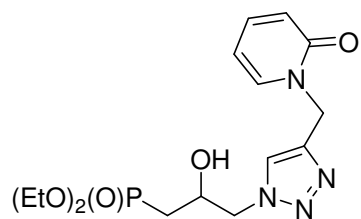

*Diethyl 2-hydroxy-3-[4-[(2-oxopyridin-1-yl)methyl]-1H-1,2,3-triazol-1-yl]propylphosphonate* **25i**. Brown oil; IR (film):  $\nu = 3307, 2988, 2909, 1658, 1226; 1048, 776 \text{ cm}^{-1}$ ;  $^1\text{H NMR}$  (300 MHz,  $\text{CDCl}_3$ ):  $\delta = 7.95$  (s, 1H); 7.60 (dd,  $J = 6.6 \text{ Hz}, J = 3.0 \text{ Hz}, 1\text{H}$ ); 7.33 (ddd,  $J = 9.3 \text{ Hz}, J = 6.3 \text{ Hz}, J = 1.8 \text{ Hz}, 1\text{H}$ ); 6.53 (d,  $J = 9.0 \text{ Hz}, 1\text{H}$ ); 6.20 (dt,  $J = 6.6 \text{ Hz}, J = 0.9 \text{ Hz}, 1\text{H}$ ); 5.18 (AB,  $J = 14.4 \text{ Hz}, 1\text{H}, \text{CH}_a\text{H}_b$ ); 5.16 (AB,  $J = 14.4 \text{ Hz}, 1\text{H}, \text{CH}_a\text{H}_b$ ); 4.53 (dd,  $J = 15.6 \text{ Hz}, J = 6.6 \text{ Hz}, 1\text{H}, \text{PCCCH}_a\text{H}_b$ ); 4.56–4.34 (m, 2H,  $\text{PCCCH}_a\text{H}_b$ ); 4.18–4.03 (m, 4H,  $2 \times \text{POCH}_2\text{CH}_3$ ); 2.95 (brs, 1H, OH); 2.07–1.80 (m, 2H,  $\text{PCH}_2$ ); 1.33 (t,  $J = 6.9 \text{ Hz}, 3\text{H}, \text{POCH}_2\text{CH}_3$ ); 1.32 (t,  $J = 6.9 \text{ Hz}, 3\text{H}, \text{POCH}_2\text{CH}_3$ );  $^{13}\text{C NMR}$  (75.5 MHz,  $\text{CDCl}_3$ ):  $\delta = 162.2$  (s, C=O); 141.8 (s, HC=C); 140.1; 137.8; 125.4 (s, HC=C); 120.2; 106.7; 65.2 (d,  $J = 2.6 \text{ Hz}, \text{PCC}$ ); 62.2 (d,  $J = 6.6 \text{ Hz}, \text{POC}$ ); 61.9 (d,  $J = 6.6 \text{ Hz}, \text{POC}$ ); 55.9 (d,  $J = 14.9 \text{ Hz}, \text{PCCC}$ ); 44.4; 31.0 (d,  $J = 139.7 \text{ Hz}, \text{PC}$ ); 16.3 (d,  $J = 6.0 \text{ Hz}, \text{POCC}$ );  $^{31}\text{P NMR}$  (121.5 MHz,  $\text{CDCl}_3$ ):  $\delta = 29.28$  ppm. Anal. Calcd. for  $\text{C}_{15}\text{H}_{23}\text{N}_4\text{O}_5\text{P}$ : C, 48.65; H, 6.26; N, 15.13. Found: C, 48.88; H, 6.34; N, 15.00.

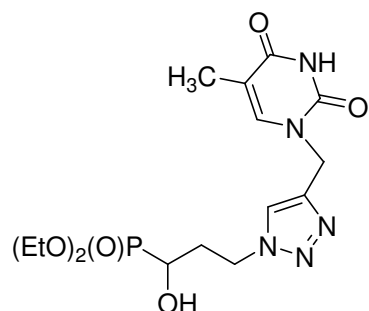

*Diethyl 1-hydroxy-3-(4-[[5-methyl-2,4-dioxypyrimidin-1(2H)-yl]methyl]-1H-1,2,3-triazol-1-yl)propylphosphonate* **26b**. White powder; m.p.: 169–171°C; IR (KBr):  $\nu = 3410, 2989, 2938, 1682, 1225, 1022 \text{ cm}^{-1}$ ;  $^1\text{H NMR}$  (300 MHz,  $\text{CDCl}_3$ ):  $\delta = 9.89$  (brs, 1H, NH); 7.87 (s, 1H,  $\text{HC}5'$ ); 7.37 (d,  $J = 1.0 \text{ Hz}, 1\text{H}, \text{HC}=\text{CH}$ ); 4.95 (AB,  $J = 14.9 \text{ Hz}, 1\text{H}, \text{CH}_a\text{H}_b$ ); 4.92 (AB,  $J = 14.9 \text{ Hz}, 1\text{H}, \text{CH}_a\text{H}_b$ ); 4.63–4.55 (m, 2H,  $\text{PCCCH}_2$ ); 4.23–4.09 (m, 4H,  $2 \times \text{POCH}_2\text{CH}_3$ ); 3.80 (ddd,  $J = 10.7 \text{ Hz}, J = 6.3 \text{ Hz}, J = 3.3 \text{ Hz}, 1\text{H}, \text{PCH}(\text{OH})$ ); 2.40–2.17 (m, 3H,  $\text{PCCCH}_2, \text{OH}$ ); 1.91 (d,  $J = 1.0 \text{ Hz}, 3\text{H}, \text{CH}_3$ ); 1.33 (t,  $J = 6.9 \text{ Hz}, 3\text{H}, \text{POCH}_2\text{CH}_3$ ); 1.30 (t,  $J = 6.9 \text{ Hz}, 3\text{H}, \text{POCH}_2\text{CH}_3$ );  $^{13}\text{C NMR}$  (75.5 MHz,  $\text{CD}_3\text{OD}$ ):  $\delta = 166.7$  (s, C=O); 152.6 (s, C=O); 142.6; 125.5; 111.6; 65.1 (d,  $J = 167.8 \text{ Hz}, \text{PC}$ ); 64.4 (d,  $J = 7.5 \text{ Hz}, \text{POC}$ ); 64.2 (d,  $J = 7.5 \text{ Hz}, \text{POC}$ ); 47.7 (d,  $J = 16.1 \text{ Hz}, \text{PCCC}$ ); 43.9; 33.2 (d,  $J = 4.0 \text{ Hz}, \text{PCC}$ ); 17.0 (d,  $J = 4.9 \text{ Hz}, \text{POCC}$ ); 16.9 (d,  $J = 4.9 \text{ Hz}, \text{POCC}$ ); 12.5;  $^{31}\text{P NMR}$  (121.5 MHz,  $\text{CDCl}_3$ ):  $\delta = 24.76$  ppm. Anal. Calcd. for  $\text{C}_{15}\text{H}_{24}\text{N}_5\text{O}_6\text{P}$ : C, 44.89; H, 6.03; N, 17.45. Found: C, 45.10; H, 5.89; N, 17.38.



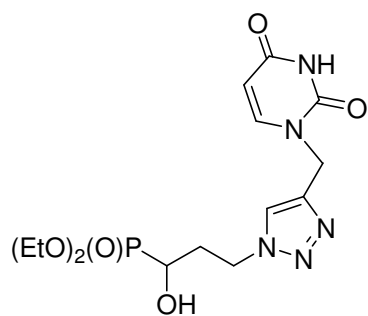

*Diethyl 3-(4-([2,4-dioxypyrimidin-1-yl]methyl)-1H-1,2,3-triazol-1-yl)-1-hydroxypropylphosphonate* **26c**. White solid; m.p.: 136–138°C; IR (KBr):  $\nu = 3405, 2984, 2932, 1680, 1227, 1025 \text{ cm}^{-1}$ ;  $^1\text{H NMR}$  (300 MHz,  $\text{CDCl}_3$ ):  $\delta = 10.49$  (brs, 1H, NH); 7.90 (s, 1H,  $\text{HC}5'$ ); 7.59 (d,  $J = 7.9 \text{ Hz}$ , 1H,  $\text{HC}=\text{CH}$ ); 5.72 (d,  $J = 7.9 \text{ Hz}$ , 1H,  $\text{HC}=\text{CH}$ ); 5.01 (AB,  $J = 15.5 \text{ Hz}$ , 1H,  $\text{CH}_a\text{H}_b$ ); 4.97 (AB,  $J = 15.5 \text{ Hz}$ , 1H,  $\text{CH}_a\text{H}_b$ ); 4.61 (brt,  $J = 6.4 \text{ Hz}$ , 2H,  $\text{PCCCH}_2$ ); 4.23–4.10 (m, 4H,  $2 \times \text{POCH}_2\text{CH}_3$ ); 3.86–3.74 (m, 1H,  $\text{PCH}(\text{OH})$ ); 2.44–2.17 (m, 2H,  $\text{PCCH}_2$ ); 1.32 (t,  $J = 7.0 \text{ Hz}$ , 3H,  $\text{POCH}_2\text{CH}_3$ ); 1.30 (t,  $J = 7.0 \text{ Hz}$ , 3H,  $\text{POCH}_2\text{CH}_3$ );  $^{13}\text{C NMR}$  (75.5 MHz,  $\text{CDCl}_3$ ):  $\delta = 164.5$  (s,  $\text{C}=\text{O}$ ); 151.4 (s,  $\text{C}=\text{O}$ ); 144.9; 141.7; 124.9; 102.6; 64.0 (d,  $J = 166.0 \text{ Hz}$ , PC); 63.3 (d,  $J = 7.0 \text{ Hz}$ , POC); 63.1 (d,  $J = 7.0 \text{ Hz}$ , POC); 46.7 (d,  $J = 17.2 \text{ Hz}$ , PCCC); 43.3; 31.9; 16.6 (d,  $J = 5.4 \text{ Hz}$ , POCC); 16.5 (d,  $J = 5.4 \text{ Hz}$ , POCC);  $^{31}\text{P NMR}$  (121.5 MHz,  $\text{CDCl}_3$ ):  $\delta = 24.84 \text{ ppm}$ .

Anal. Calcd. for  $\text{C}_{14}\text{H}_{22}\text{N}_5\text{O}_6\text{P}$ : C, 43.41; H, 5.73; N, 18.08. Found: C, 43.57; H, 5.61; N, 17.89.

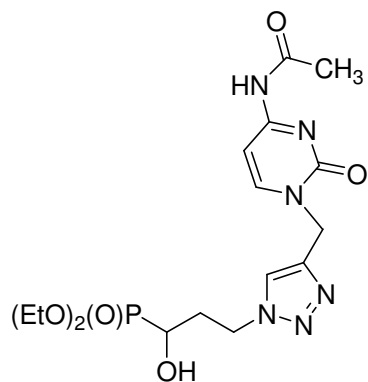

*Diethyl 3-(4-([ $N^4$ -acetylamino-2-oxypyrimidin-1-yl]methyl)-1H-1,2,3-triazol-1-yl)-1-hydroxypropylphosphonate* **26d**. White powder; m.p.: 175–177°C; IR (KBr):  $\nu = 3406, 3124, 2930, 2873, 1706, 1654, 1221, 1021 \text{ cm}^{-1}$ ;  $^1\text{H NMR}$  (300 MHz,  $\text{CDCl}_3$ ):  $\delta = 10.96$  (brs, 1H, NH); 8.71 (s, 1H,  $\text{HC}5'$ ); 7.93 (d,  $J = 7.4 \text{ Hz}$ , 1H,  $\text{HC}=\text{CH}$ ); 7.44 (d,  $J = 7.4 \text{ Hz}$ , 1H,  $\text{HC}=\text{CH}$ ); 5.32 (d,  $J = 14.6 \text{ Hz}$ , 1H,  $\text{CH}_a\text{H}_b$ ); 5.05 (d,  $J = 14.6 \text{ Hz}$ , 1H,  $\text{CH}_a\text{H}_b$ ); 4.91–4.83 (m, 1H,  $\text{PCCCH}_a\text{H}_b$ ); 4.75–4.65 (m, 1H,  $\text{PCCCH}_a\text{H}_b$ ); 4.25–4.14 (m, 2H,  $\text{POCH}_2\text{CH}_3$ ); 4.13–4.03 (m, 2H,  $\text{POCH}_2\text{CH}_3$ ); 3.87–3.81 (m, 1H,  $\text{PCH}(\text{OH})$ ); 2.32–2.24 (m, 3H,  $\text{PCCH}_2, \text{OH}$ ); 2.24 (s, 3H,  $\text{CH}_3$ ); 1.35 (t,  $J = 7.1 \text{ Hz}$ , 3H,  $\text{POCH}_2\text{CH}_3$ ); 1.27 (t,  $J = 7.1 \text{ Hz}$ , 3H,  $\text{POCH}_2\text{CH}_3$ );  $^{13}\text{C NMR}$  (75.5 MHz,  $\text{CD}_3\text{OD}$ ):  $\delta = 172.8; 164.4; 158.2; 150.7; 143.2; 125.9; 98.4; 65.0$  (d,  $J = 168.0 \text{ Hz}$ , PC); 64.4 (d,  $J = 7.5 \text{ Hz}$ , POC); 64.1 (d,  $J = 7.5 \text{ Hz}$ , POC); 47.7 (d,  $J = 16.3 \text{ Hz}$ , PCCC); 46.4; 33.2 (s, PCC); 24.7; 16.9 (d,  $J = 4.9 \text{ Hz}$ , POCC);  $^{31}\text{P NMR}$  (121.5 MHz,  $\text{CDCl}_3$ ):  $\delta = 25.96 \text{ ppm}$ . Anal. Calcd. for  $\text{C}_{16}\text{H}_{25}\text{N}_6\text{O}_6\text{P}$ : C, 44.86; H, 5.88; N, 19.62. Found: C, 45.10; H, 6.00; N, 19.74.

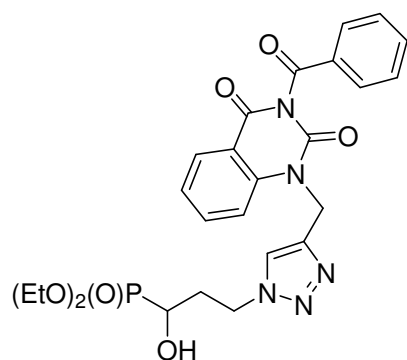

*Diethyl 3-(4-([3-benzoyl-2,4-dioxypyrimidin-1-yl]methyl)-1H-1,2,3-triazol-1-yl)-1-hydroxyethylphosphonate* **26e**.

White powder; m.p.: 82–84°C; IR (KBr):  $\nu = 3299, 2988, 1746, 1702, 1664, 1233, 1027, 757, 674 \text{ cm}^{-1}$ ;  $^1\text{H}$  NMR (300 MHz,  $\text{CDCl}_3$ ):  $\delta = 8.20$  (dd,  $J = 7.9 \text{ Hz}, J = 1.6 \text{ Hz}, 1\text{H}$ ); 7.99–7.95 (m, 2H,  $2 \times o\text{-CH}$ ); 7.93 (brd,  $J = 8.5 \text{ Hz}, 1\text{H}$ ); 7.78 (ddd,  $J = 8.5 \text{ Hz}, J = 7.9 \text{ Hz}, J = 1.6 \text{ Hz}, 1\text{H}$ ); 7.74

(s, 1H,  $\text{HC5}'$ ); 7.70–7.64 (m, 1H,  $p\text{-CH}$ ); 7.54–7.46 (m, 2H,  $2 \times m\text{-CH}$ ); 7.29 (dt,  $J = 7.9 \text{ Hz}, J = 0.8 \text{ Hz}, 1\text{H}$ ); 5.42 (AB,  $J = 15.7 \text{ Hz}, 1\text{H}, \text{CH}_a\text{H}_b$ ); 5.36 (AB,  $J = 15.7 \text{ Hz}, 1\text{H}, \text{CH}_a\text{H}_b$ ); 4.66–4.54 (m, 2H,  $\text{PCCCH}_2$ ); 4.18–4.04 (m, 4H,  $2 \times \text{POCH}_2\text{CH}_3$ ); 3.78 (ddd,  $J = 10.7 \text{ Hz}, J = 6.2 \text{ Hz}, J = 3.4 \text{ Hz}, 1\text{H}, \text{PCH(OH)}$ ); 2.38–2.10 (m, 2H,  $\text{PCCH}_2$ ); 1.30 (t,  $J = 7.0 \text{ Hz}, 3\text{H}, \text{POCH}_2\text{CH}_3$ ); 1.28 (t,  $J = 7.0 \text{ Hz}, 3\text{H}, \text{POCH}_2\text{CH}_3$ );  $^{13}\text{C}$  NMR (75.5 MHz,  $\text{CDCl}_3$ ):  $\delta = 168.7$  (s,  $\text{C=O}$ ); 161.1 (s,  $\text{C=O}$ ); 149.6 (s,  $\text{C=O}$ ); 142.3 (s,  $\text{HC=C}$ ); 140.3; 136.3; 135.2; 131.6; 130.7; 129.3; 128.9; 124.4 (s,  $\text{HC=C}$ ); 123.9; 115.6; 115.4; 64.4 (d,  $J = 166.4 \text{ Hz}, \text{PC}$ ); 63.3 (d,  $J = 6.8 \text{ Hz}, \text{POC}$ ); 63.0 (d,  $J = 6.8 \text{ Hz}, \text{POC}$ ); 48.6 (d,  $J = 16.1 \text{ Hz}, \text{PCCC}$ ); 39.0; 31.9 16.7 (d,  $J = 5.2 \text{ Hz}, \text{POCC}$ ); 16.6 (d,  $J = 5.2 \text{ Hz}, \text{POCC}$ );  $^{31}\text{P}$  NMR (121.5 MHz,  $\text{CDCl}_3$ ):  $\delta = 24.57$  ppm. Anal. Calcd. for  $\text{C}_{25}\text{H}_{28}\text{N}_5\text{O}_7\text{P}$ : C, 55.45; H, 5.21; N, 12.93. Found: C, 55.60; H, 5.34; N, 13.09.

# <sup>1</sup>H NMR

SpinWorks 3: ieg6482h

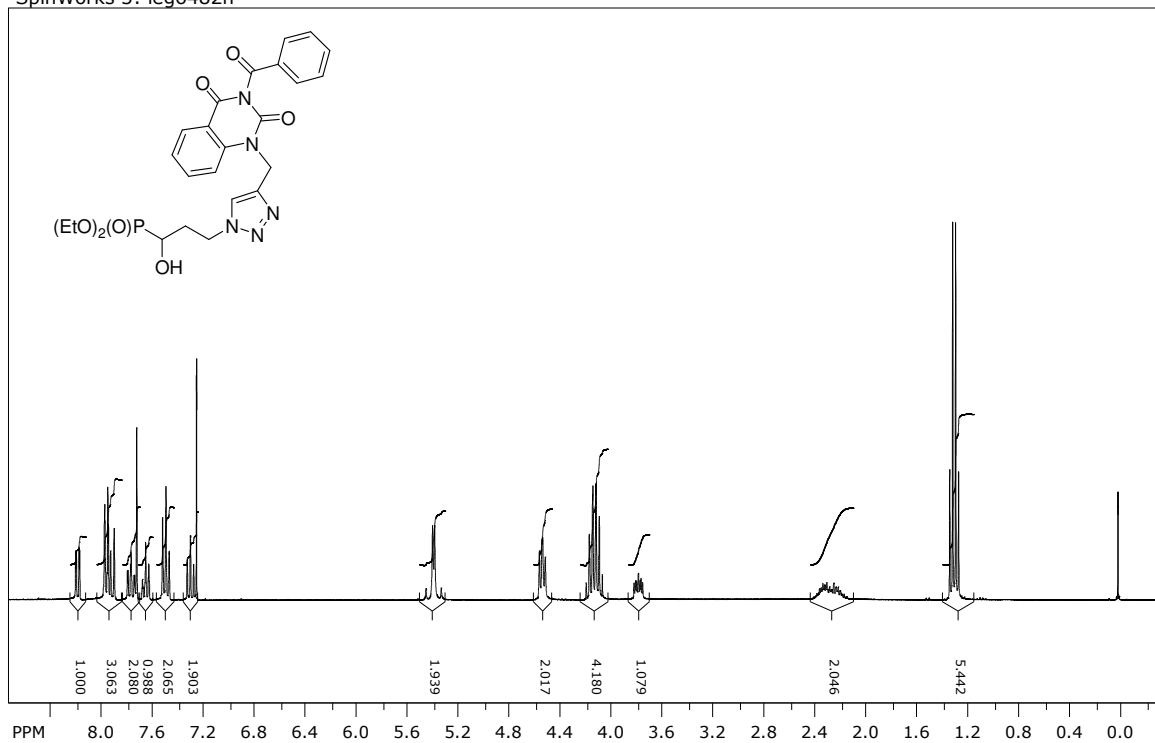

file: ...NMR-widma\NMR\IEG\ieg6482h.fid\fid block# 1 expt: "s2pul"  
transmitter freq.: 300.063051 MHz  
time domain size: 52032 points  
width: 6500.00 Hz = 21.6621 ppm = 0.124923 Hz/pt  
number of scans: 16

freq. of 0 ppm: 300.060199 MHz  
processed size: 65536 complex points  
LB: 0.000 GF: 0.0000  
Hz/cm: 109.179 ppm/cm: 0.36385

# <sup>13</sup>C NMR

SpinWorks 3: ieg6482c

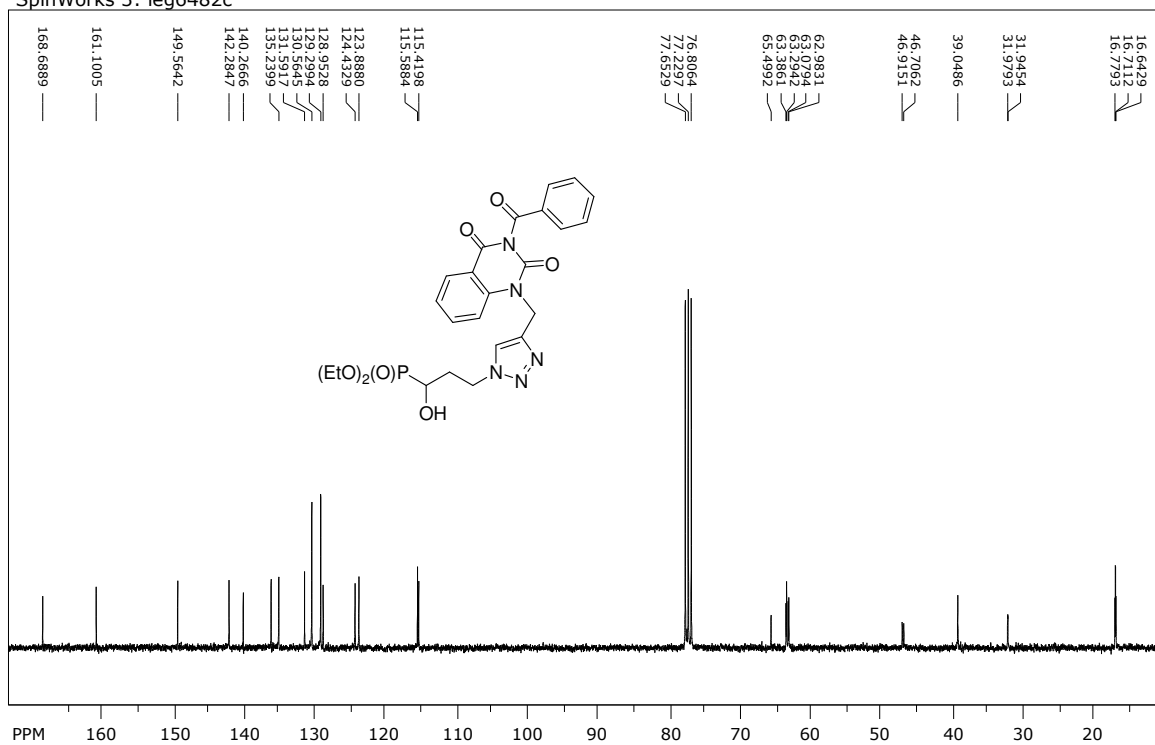

file: ...NMR-widma\NMR\IEG\ieg6483c.fid\fid block# 1 expt: "s2pul"  
transmitter freq.: 75.457729 MHz  
time domain size: 68096 points  
width: 18761.73 Hz = 248.6389 ppm = 0.275519 Hz/pt  
number of scans: 1024

freq. of 0 ppm: 75.450189 MHz  
processed size: 131072 complex points  
LB: 1.000 GF: 0.0000  
Hz/cm: 493.336 ppm/cm: 6.53792

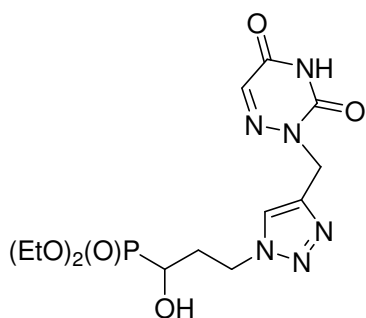

*Diethyl 1-hydroxy-3-{4-[(3,5-dioxo-1,2,4-triazin-2-yl)methyl]-1H-1,2,3-triazol-1-yl}-1-hydroxypropylphosphonate* **26f**.

Yellow solid; m.p.: 116–118°C; IR (KBr):  $\nu = 3284, 3152, 2988, 2912, 1731, 1658, 1050 \text{ cm}^{-1}$ ;  $^1\text{H}$  NMR (300 MHz,  $\text{CDCl}_3$ ):  $\delta = 12.1$  (s, 1H, NH); 7.85 (s, 1H); 7.40 (s, 1H); 5.17 (s, 1H,  $\text{CH}_2$ ); 4.60–4.51 (m, 2H,  $\text{PCCCH}_2$ ); 4.21–4.09 (m, 4H,  $2 \times \text{POCH}_2\text{CH}_3$ ); 3.87 (ddd,  $J = 10.1 \text{ Hz}, J = 6.1 \text{ Hz}, J = 2.9 \text{ Hz}$ , 1H,  $\text{PCH}(\text{OH})$ ); 2.41–2.16 (m, 3H,  $\text{PCCH}_2, \text{OH}$ ); 1.31 (t,  $J = 7.0 \text{ Hz}$ , 3H,  $\text{POCH}_2\text{CH}_3$ ); 1.29 (t,  $J = 7.0 \text{ Hz}$ , 3H,  $\text{POCH}_2\text{CH}_3$ );  $^{13}\text{C}$  NMR (75.5 MHz,  $\text{CDCl}_3$ ):  $\delta = 155.9$  (s,  $\text{C}=\text{O}$ ); 149.4 ( $\text{C}=\text{O}$ ); 141.4 (s,  $\text{HC}=\text{C}$ ); 135.0 (s,  $\text{HC}=\text{N}$ ); 124.8 (s,  $\text{HC}=\text{C}$ ); 64.1 (d,  $J = 166.3 \text{ Hz}$ , PC); 63.3 (d,  $J = 7.2 \text{ Hz}$ , POC); 63.2 (d,  $J = 7.2 \text{ Hz}$ , POC); 46.6 (d,  $J = 17.2 \text{ Hz}$ , PCCC); 34.7; 31.9; 16.6 (d,  $J = 5.6 \text{ Hz}$ , POCC); 16.5 (d,  $J = 5.6 \text{ Hz}$ , POCC);  $^{31}\text{P}$  NMR (121.5 MHz,  $\text{CDCl}_3$ ):  $\delta = 25.12$  ppm. Anal. Calcd. for  $\text{C}_{13}\text{H}_{21}\text{N}_6\text{O}_6\text{P}$ : C, 40.21; H, 5.45; N, 21.64. Found: C, 40.05; H, 5.61; N, 21.77.

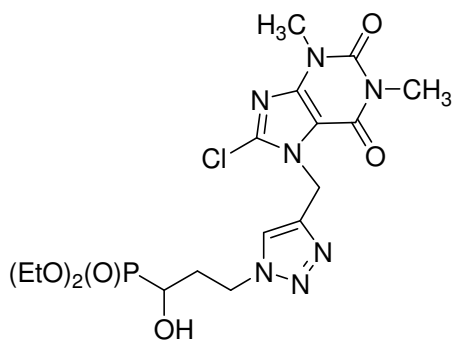

*Diethyl 3-{4-[(8-chloro-1,3-dimethyl-2,6-dioxopurin-7-yl)methyl]-1H-1,2,3-triazol-1-yl}-1-hydroxypropylphosphonate* **26g**.

White powder; m.p.: 164–165°C; IR (KBr):  $\nu = 3300, 2993, 1706, 1663, 1217, 1027 \text{ cm}^{-1}$ ;  $^1\text{H}$  NMR (300 MHz,  $\text{CDCl}_3$ ):  $\delta = 7.84$  (s, 1H); 5.64 (AB,  $J = 14.8 \text{ Hz}$ , 1H,  $\text{CH}_a\text{H}_b$ ); 5.61 (AB,  $J = 14.8 \text{ Hz}$ , 1H,  $\text{CH}_a\text{H}_b$ ); 4.60–4.50 (m, 2H,  $\text{PCCCH}_2$ ); 4.21–4.09 (m, 4H,  $2 \times \text{POCH}_2\text{CH}_3$ ); 3.80 (ddd,  $J = 10.7 \text{ Hz}, J = 6.3 \text{ Hz}, J = 3.4 \text{ Hz}$ , 1H,  $\text{PCH}(\text{OH})$ ); 3.54 (s, 3H,  $\text{CH}_3$ ); 3.40 (s, 3H,  $\text{CH}_3$ ); 3.25 (brs, 1H, OH); 2.37–2.20 (m, 2H,  $\text{PCCH}_2$ ); 1.33 (t,  $J = 6.9 \text{ Hz}$ , 3H,  $\text{POCH}_2\text{CH}_3$ ); 1.31 (t,  $J = 6.9 \text{ Hz}$ , 3H,  $\text{POCH}_2\text{CH}_3$ );  $^{13}\text{C}$  NMR (75.5 MHz,  $\text{CDCl}_3$ ):  $\delta = 154.3$  (s,  $\text{C}=\text{O}$ ); 151.0 (s,  $\text{C}=\text{O}$ ); 147.2; 141.4; 138.9; 124.1; 107.3; 64.1 (d,  $J = 165.7 \text{ Hz}$ , PC); 63.1 (d,  $J = 7.1 \text{ Hz}$ , POC); 62.9 (d,  $J = 7.1 \text{ Hz}$ , POC); 46.6 (d,  $J = 15.8 \text{ Hz}$ , PCCC); 41.0; 31.9 (d,  $J = 2.6 \text{ Hz}$ , PCC); 29.9; 28.1; 16.6 (d,  $J = 5.2 \text{ Hz}$ , POCC); 16.5 (d,  $J = 5.2 \text{ Hz}$ , POCC);  $^{31}\text{P}$  NMR (121.5 MHz,  $\text{CDCl}_3$ ):  $\delta = 24.61$  ppm. Anal. Calcd. for  $\text{C}_{17}\text{H}_{25}\text{ClN}_7\text{O}_6\text{P}$ : C, 41.68; H, 5.14; N, 20.02. Found: C, 41.79; H, 5.08; N, 20.10.

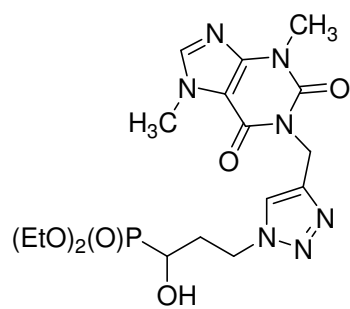

*Diethyl 3-{4-[(3,7-dimethyl-2,6-dioxopurin-1-yl)methyl]-1H-1,2,3-triazol-1-yl}-1-hydroxypropylphosphonate* **26h**. White powder; m.p.: 129–130°C; IR (KBr):  $\nu = 3288, 2984, 1707, 1661, 1233, 1049 \text{ cm}^{-1}$ ;  $^1\text{H NMR}$  (300 MHz,  $\text{CDCl}_3$ ):  $\delta = 7.69$  (s, 1H); 7.54 (s, 1H); 5.33 (AB,  $J = 14.5$  Hz, 1H,  $\text{CH}_a\text{H}_b$ ); 5.28 (AB,  $J = 14.5$  Hz, 1H,  $\text{CH}_a\text{H}_b$ ); 4.65–4.45 (m, 2H,  $\text{PCCCH}_2$ );

4.21–4.09 (m, 4H,  $2 \times \text{POCH}_2\text{CH}_3$ ); 4.00 (s, 3H,  $\text{CH}_3$ ); 3.85–3.76 (m, 1H,  $\text{PCH}(\text{OH})$ ); 3.57 (s, 3H,  $\text{CH}_3$ ); 2.33–2.16 (m, 3H,  $\text{PCH}_2, \text{OH}$ ); 1.32 (t,  $J = 6.4$  Hz, 3H,  $\text{POCH}_2\text{CH}_3$ ); 1.31 (t,  $J = 6.4$  Hz, 3H,  $\text{POCH}_2\text{CH}_3$ );  $^{13}\text{C NMR}$  (75.5 MHz,  $\text{CDCl}_3$ ):  $\delta = 154.5$  (s,  $\text{C}=\text{O}$ ); 151.0 (s,  $\text{C}=\text{O}$ ); 148.6; 143.2; 141.8; 123.7; 107.4; 64.4 (d,  $J = 166.3$  Hz, PC); 62.8 (d,  $J = 7.2$  Hz, POC); 62.7 (d,  $J = 7.2$  Hz, POC); 46.3 (d,  $J = 16.0$  Hz, PCCC); 35.9; 33.6; 31.9; 29.7; 16.4 (d,  $J = 5.5$  Hz, POCC); 16.2 (d,  $J = 5.5$  Hz, POCC);  $^{31}\text{P NMR}$  (121.5 MHz,  $\text{CDCl}_3$ ):  $\delta = 24.85$  ppm. Anal. Calcd. for  $\text{C}_{17}\text{H}_{26}\text{N}_7\text{O}_6\text{P}$ : C, 44.84; H, 5.75; N, 21.53. Found: C, 44.71; H, 5.66; N, 21.65.

## $^1\text{H NMR}$

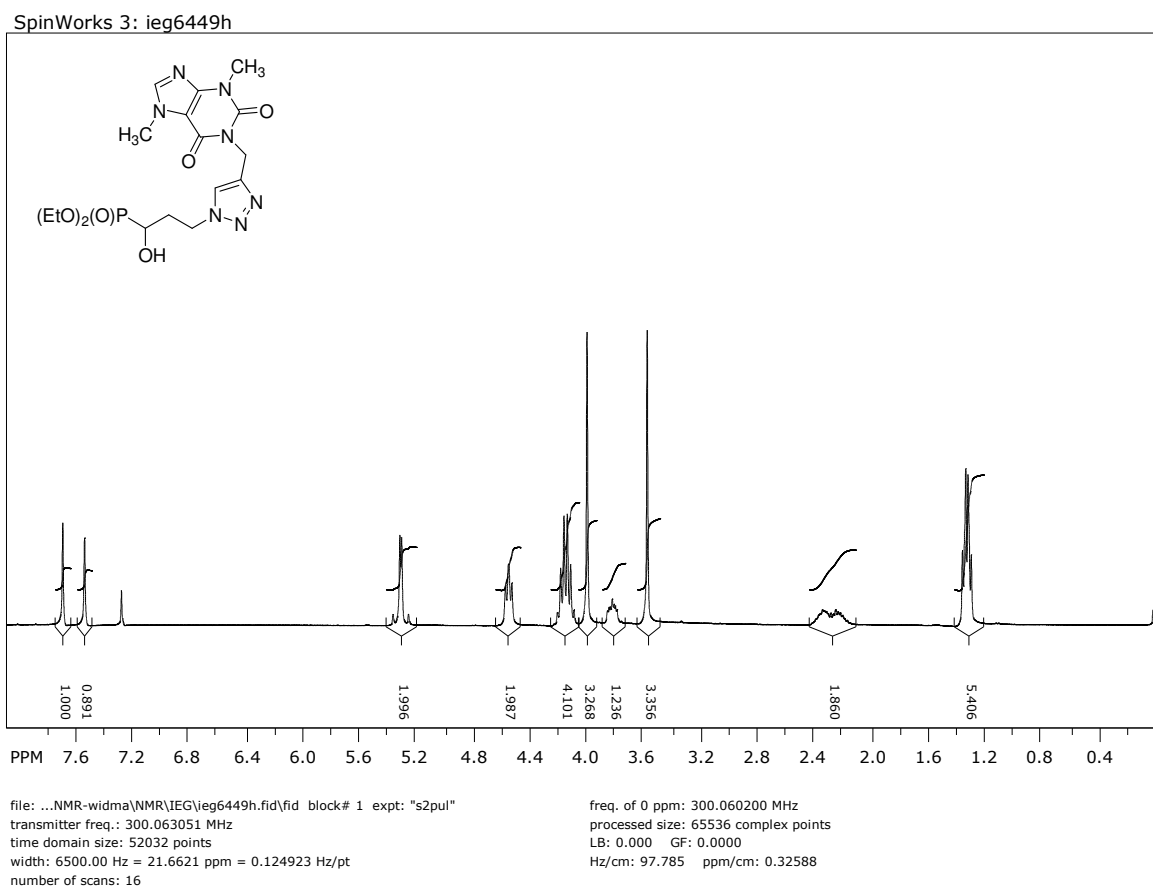

# <sup>13</sup>C NMR

SpinWorks 3: ieg6448C

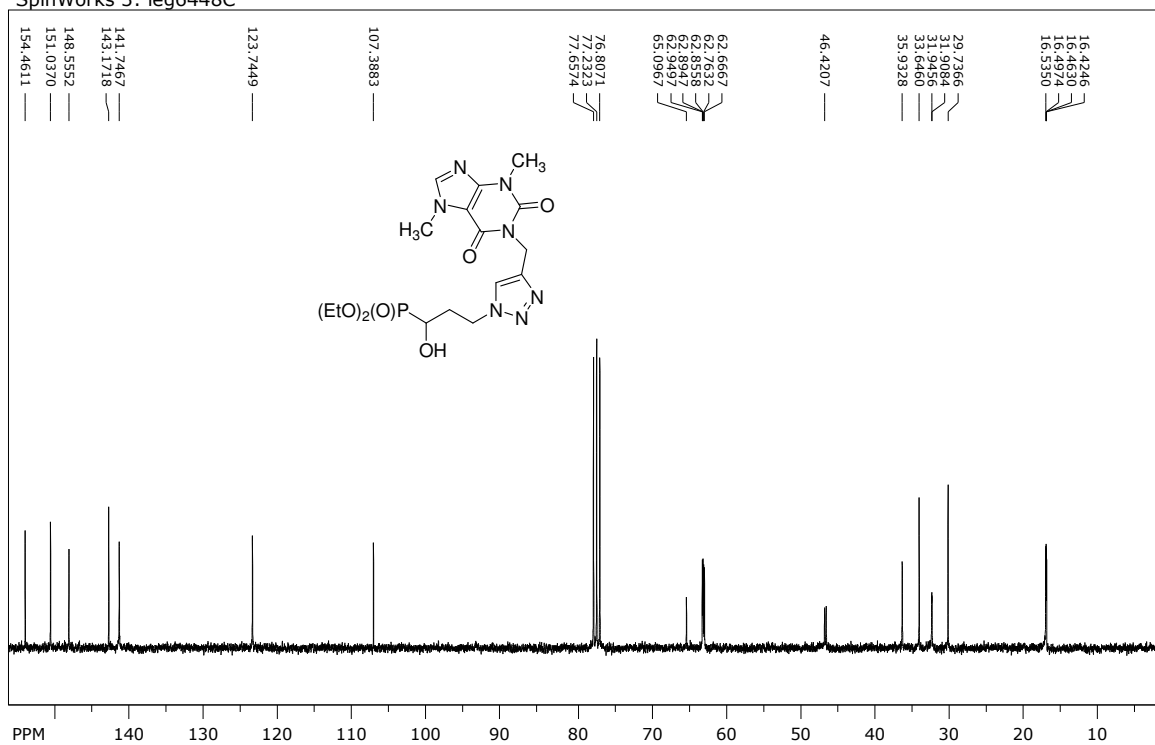

file: ...NMR-widma\NMR\IEG\ieg6448C.fid\fid block# 1 expt: "s2pul"  
transmitter freq.: 75.457729 MHz  
time domain size: 68096 points  
width: 18761.73 Hz = 248.6389 ppm = 0.275519 Hz/pt  
number of scans: 320

freq. of 0 ppm: 75.450202 MHz  
processed size: 131072 complex points  
LB: 1.000 GF: 0.0000  
Hz/cm: 470.613 ppm/cm: 6.23677

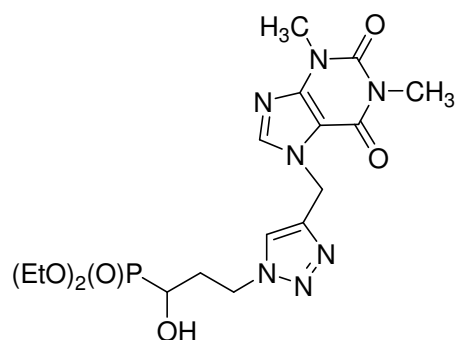

*Diethyl* 3-{4-[(1,3-dimethyl-2,6-dioxopurin-7-yl)methyl]-1H-1,2,3-triazol-1-yl}-1-hydroxypropylphosphonate **26i**. White powder; m.p.: 123–125°C; IR (KBr):  $\nu = 3365, 2991, 1704, 1658, 1222, 1050 \text{ cm}^{-1}$ ;  $^1\text{H NMR}$  (600 MHz,  $\text{CDCl}_3$ ):  $\delta = 7.89$  (s, 1H); 7.87 (s, 1H); 5.62 (AB,  $J = 14.9 \text{ Hz}$ , 1H,  $\text{CH}_a\text{H}_b$ ); 5.59 (AB,  $J = 14.9 \text{ Hz}$ , 1H,  $\text{CH}_a\text{H}_b$ ); 4.63–4.55

(m, 2H,  $\text{PCCCH}_2$ ); 4.22–4.09 (m, 4H,  $2 \times \text{POCH}_2\text{CH}_3$ ); 3.80 (ddd,  $J = 10.9 \text{ Hz}$ ,  $J = 6.2 \text{ Hz}$ ,  $J = 3.3 \text{ Hz}$ , 1H,  $\text{PCH(OH)}$ ); 3.59 (s, 3H,  $\text{CH}_3$ ); 3.43 (s, 3H,  $\text{CH}_3$ ); 2.37 (dddd,  $J = 14.4 \text{ Hz}$ ,  $J = 8.0 \text{ Hz}$ ,  $J = 8.0 \text{ Hz}$ ,  $J = 6.1 \text{ Hz}$ ,  $J = 3.3 \text{ Hz}$ , 1H,  $\text{PCCH}_a\text{H}_b$ ); 2.26 (dddd,  $J = 14.4 \text{ Hz}$ ,  $J = 10.9 \text{ Hz}$ ,  $J = 6.4 \text{ Hz}$ ,  $J = 5.6 \text{ Hz}$ ,  $J = 5.6 \text{ Hz}$ , 1H,  $\text{PCCH}_a\text{H}_b$ ); 1.35 (t,  $J = 6.9 \text{ Hz}$ , 3H,  $\text{POCH}_2\text{CH}_3$ ); 1.33 (t,  $J = 6.9 \text{ Hz}$ , 3H,  $\text{POCH}_2\text{CH}_3$ );  $^{13}\text{C NMR}$  (75.5 MHz,  $\text{CDCl}_3$ ):  $\delta = 155.2$  (s,  $\text{C=O}$ ); 151.4 (s,  $\text{C=O}$ ); 148.7; 141.9; 141.6; 124.3; 106.3; 64.0 (d,  $J = 166.1 \text{ Hz}$ , PC); 63.1 (d,  $J = 7.1 \text{ Hz}$ , POC); 62.9 (d,  $J = 7.1 \text{ Hz}$ , POC); 46.6 (d,  $J = 15.8 \text{ Hz}$ , PCCC); 41.3; 31.9 (d,  $J = 2.8 \text{ Hz}$ , PCC); 29.9; 28.1; 16.6 (d,  $J = 5.4 \text{ Hz}$ , POCC); 16.5 (d,  $J = 5.4 \text{ Hz}$ , POCC);  $^{31}\text{P NMR}$  (243 MHz,  $\text{CDCl}_3$ ):  $\delta = 23.44 \text{ ppm}$ . Anal. Calcd. for  $\text{C}_{17}\text{H}_{26}\text{N}_7\text{O}_6\text{P}$ : C, 44.84; H, 5.75; N, 21.53. Found: C, 45.00; H, 5.90; N, 21.40.



# <sup>1</sup>H NMR

SpinWorks 3:

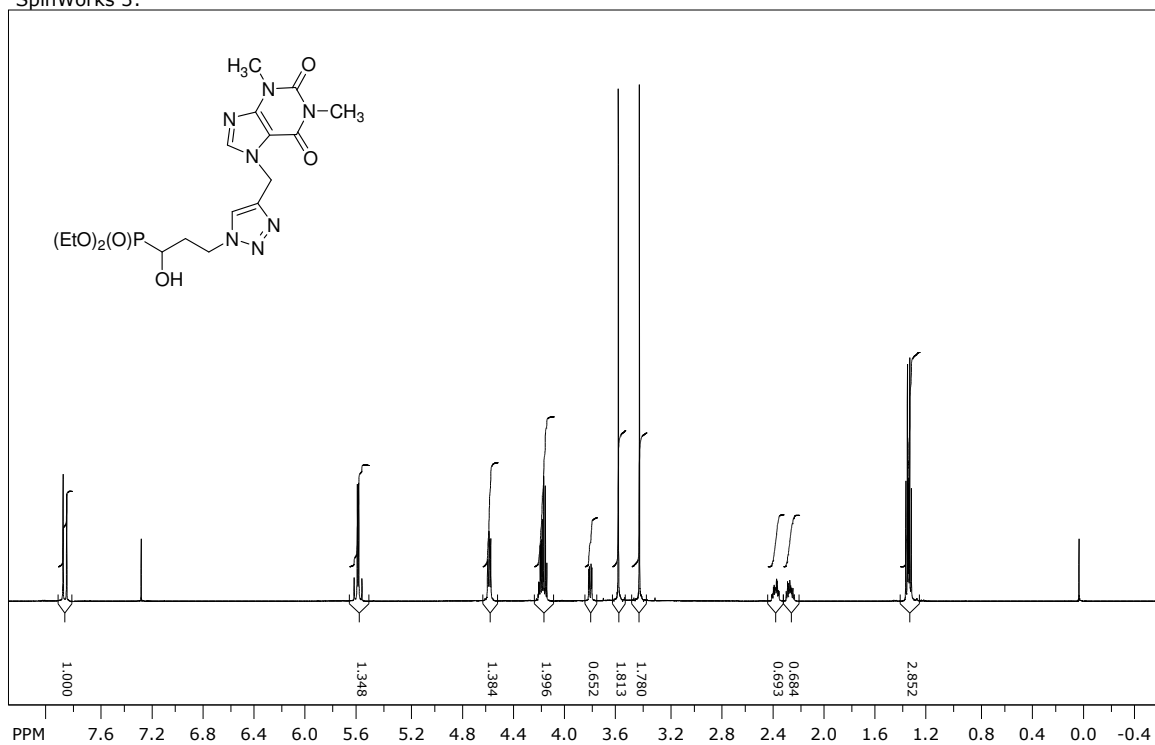

file: ...:\NMR-widma\NMR\IEG\ieg-7275\3\fid exp: <zgig>  
transmitter freq.: 600.263753 MHz  
time domain size: 32768 points  
width: 12500.00 Hz = 20.8242 ppm = 0.381470 Hz/pt  
number of scans: 16

freq. of 0 ppm: 600.260000 MHz  
processed size: 32768 complex points  
LB: 0.000 GF: 0.0000  
Hz/cm: 214.741 ppm/cm: 0.35774

# <sup>1</sup>H NMR

SpinWorks 3:

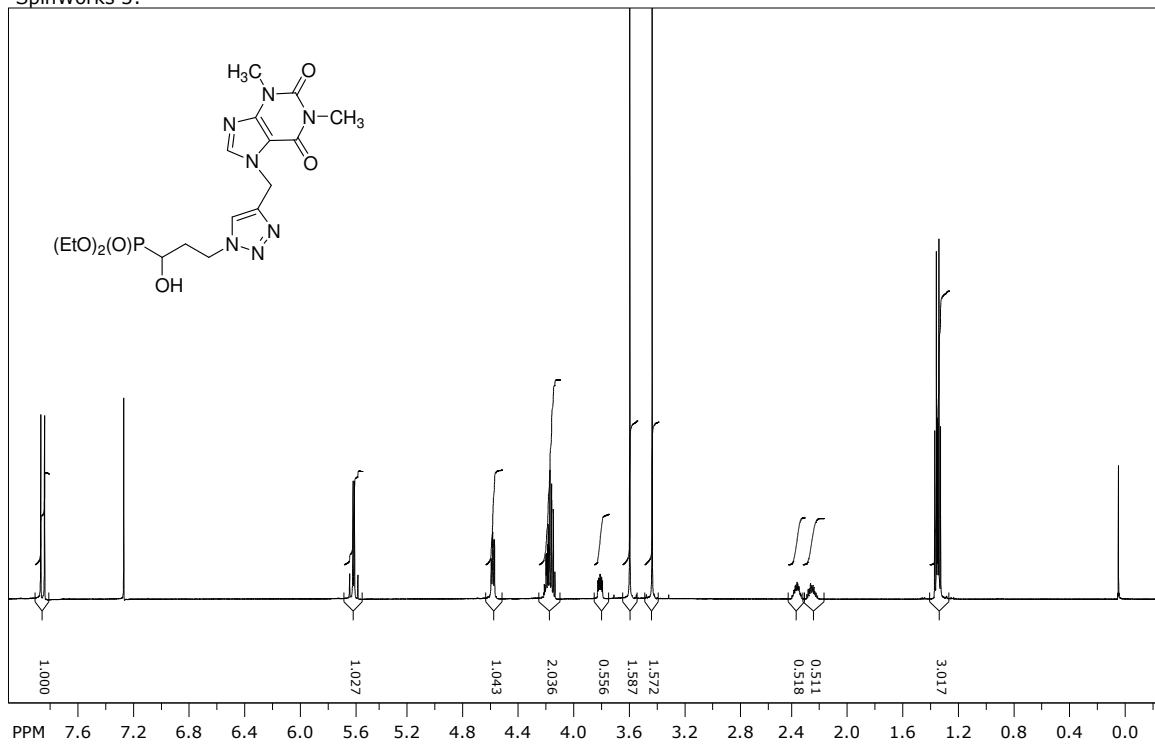

file: ...:\NMR-widma\NMR\IEG\ieg-7275\1\fid exp: <zg30>  
transmitter freq.: 600.263707 MHz  
time domain size: 65536 points  
width: 12335.53 Hz = 20.5502 ppm = 0.188225 Hz/pt  
number of scans: 16

freq. of 0 ppm: 600.260000 MHz  
processed size: 32768 complex points  
LB: 0.000 GF: 0.0000  
Hz/cm: 202.480 ppm/cm: 0.33732

# <sup>13</sup>C NMR

SpinWorks 3: ieg6442C

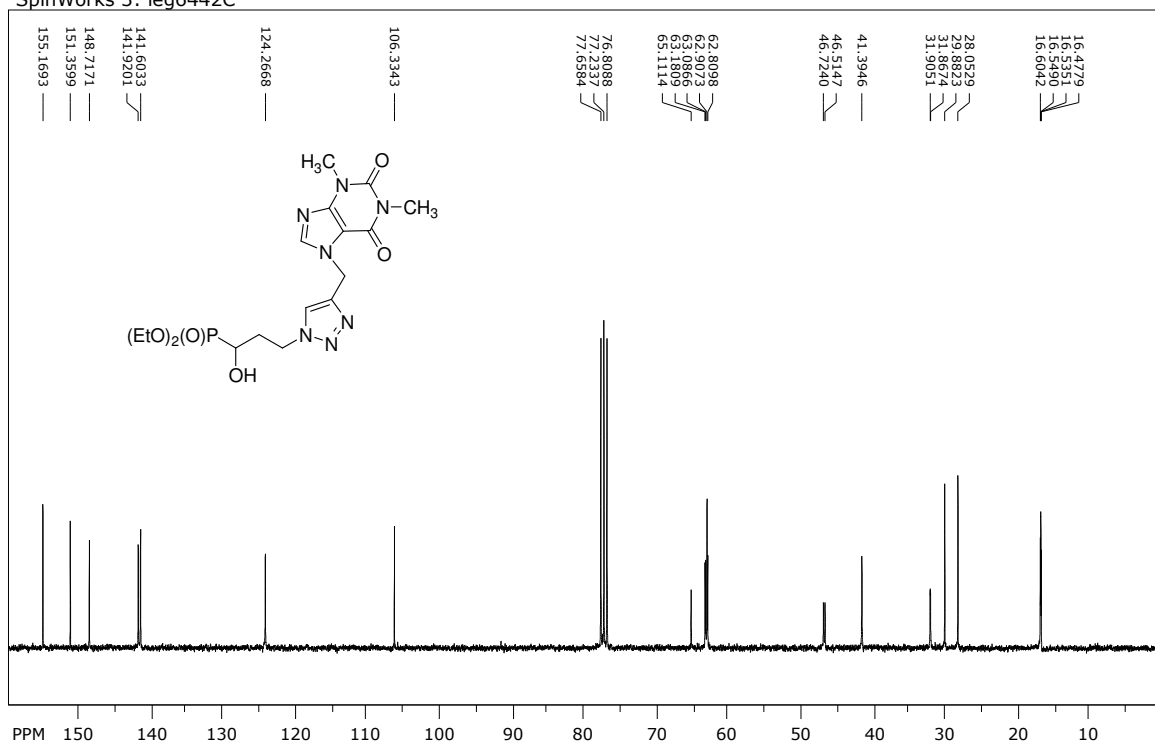

file: ...NMR-widma\NMR\IEG\ieg6442C.fid\fid block# 1 expt: "s2pul"  
transmitter freq.: 75.457729 MHz  
time domain size: 68096 points  
width: 18761.73 Hz = 248.6389 ppm = 0.275519 Hz/pt  
number of scans: 704

freq. of 0 ppm: 75.450198 MHz  
processed size: 131072 complex points  
LB: 1.000 GF: 0.0000  
Hz/cm: 483.768 ppm/cm: 6.41112

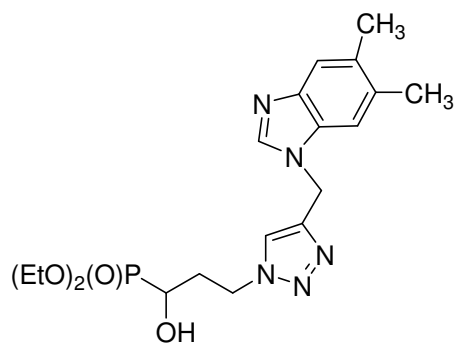

*Diethyl 3-{4-[(5,6-dimethylbenzoimidazol-1-yl)methyl]-1H-1,2,3-triazol-1-yl}-1-hydroxypropylphosphonate* **26j**.

Yellow oil; IR (film):  $\nu = 3339, 3140, 2982, 2935, 1222, 1048, 965, 838 \text{ cm}^{-1}$ ;  $^1\text{H NMR}$  (300 MHz,  $\text{CDCl}_3$ ):  $\delta = 8.08$  (s, 1H); 7.56 (s, 1H); 7.53 (s, 1H); 7.25 (s, 1H); 5.45 (s, 2H,  $\text{CH}_2$ ); 4.64–4.54 (m, 2H,  $\text{PCCCH}_2$ ); 4.18–4.05 (m, 4H,  $2 \times \text{POCH}_2\text{CH}_3$ ); 3.75 (ddd,  $J = 10.5 \text{ Hz}$ ,  $J =$

6.5 Hz,  $J = 3.2 \text{ Hz}$ , 1H,  $\text{PCH}(\text{OH})$ ); 3.40 (brs, 1H, OH); 2.37 (s, 3H,  $\text{CH}_3$ ); 2.35 (s, 3H,  $\text{CH}_3$ ); 2.34–2.14 (m, 2H,  $\text{PCCCH}_2$ ); 1.29 (t,  $J = 7.0 \text{ Hz}$ , 3H,  $\text{POCH}_2\text{CH}_3$ ); 1.26 (t,  $J = 7.0 \text{ Hz}$ , 3H,  $\text{POCH}_2\text{CH}_3$ );  $^{13}\text{C NMR}$  (75.5 MHz,  $\text{CDCl}_3$ ):  $\delta = 142.7$ ; 142.0; 141.4; 132.6; 131.8; 131.6; 123.1; 119.7; 110.2; 64.0 (d,  $J = 151.2 \text{ Hz}$ , PC); 62.8 (d,  $J = 7.1 \text{ Hz}$ , POC); 62.8 (d,  $J = 7.1 \text{ Hz}$ , POC); 46.7 (d,  $J = 15.7 \text{ Hz}$ , PCCC); 40.5; 32.0; 20.7; 20.4; 16.6 (d,  $J = 6.3 \text{ Hz}$ , POCC); 16.6 (d,  $J = 6.3 \text{ Hz}$ , POCC);  $^{31}\text{P NMR}$  (121.5 MHz,  $\text{CDCl}_3$ ):  $\delta = 24.71 \text{ ppm}$ . Anal. Calcd. for  $\text{C}_{19}\text{H}_{28}\text{N}_5\text{O}_4\text{P}$ : C, 54.15; H, 6.20; N, 16.62. Found: C, 54.00; H, 6.89; N, 16.70 .

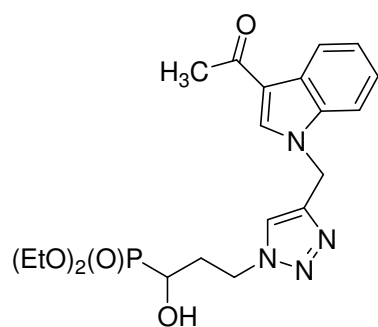

*Diethyl 3-{4-[(3-acetylidol-1-yl)methyl]-1H-1,2,3-triazol-1-yl}-1-hydroxypropylphosphonate* **26k**. Colourless oil; IR (film):  $\nu = 3330, 3140, 2984, 1799, 1527, 1389, 1223, 1022$   $\text{cm}^{-1}$ ;  $^1\text{H NMR}$  (300 MHz,  $\text{CDCl}_3$ ):  $\delta = 8.38\text{--}8.33$  (m, 1H); 7.86 (s, 1H,  $\text{HC5}'$ ); 7.47 (s, 1H); 7.43–7.38 (m, 1H); 7.31–7.25 (m, 2H); 5.41 (s, 2H,  $\text{CH}_2$ ); 4.60–4.45 (m, 2H,  $\text{PCCCH}_2$ ); 4.16–4.03 (m, 4H,  $2\times\text{POCH}_2\text{CH}_3$ ); 3.72 (ddd,  $J = 10.8$  Hz,  $J = 6.4$  Hz,  $J = 3.5$  Hz, 1H,  $\text{PCH}(\text{OH})$ ); 2.49 (s, 3H,  $\text{CH}_3$ ); 2.36–2.11 (m, 2H,  $\text{PCCH}_2$ ); 1.29 (t,  $J = 7.0$  Hz, 3H,  $\text{POCH}_2\text{CH}_3$ ); 1.26 (t,  $J = 7.0$  Hz, 3H,  $\text{POCH}_2\text{CH}_3$ );  $^{13}\text{C NMR}$  (75.5 MHz,  $\text{CDCl}_3$ ):  $\delta = 193.3$  (s,  $\text{C}=\text{O}$ ); 142.8; 136.5; 135.0; 126.4; 123.6; 123.0; 122.8; 122.7; 117.5; 109.9; 64.2 (d,  $J = 165.9$  Hz, PC); 63.2 (d,  $J = 6.3$  Hz, POC); 62.9 (d,  $J = 6.3$  Hz, POC); 46.7 (d,  $J = 15.6$  Hz, PCCC); 42.4; 31.9 (d,  $J = 2.9$  Hz, PCC); 27.8 (s,  $\text{CH}_3$ ); 16.7 (d,  $J = 6.0$  Hz, POCC); 16.6 (d,  $J = 6.0$  Hz, POCC);  $^{31}\text{P NMR}$  (121.5 MHz,  $\text{CDCl}_3$ ):  $\delta = 24.60$  ppm. Anal. Calcd. for  $\text{C}_{20}\text{H}_{27}\text{N}_4\text{O}_5\text{P}$ : C, 55.29; H, 6.26; N, 12.90. Found: C, 55.40; H, 6.10; N, 13.03.

## $^1\text{H NMR}$

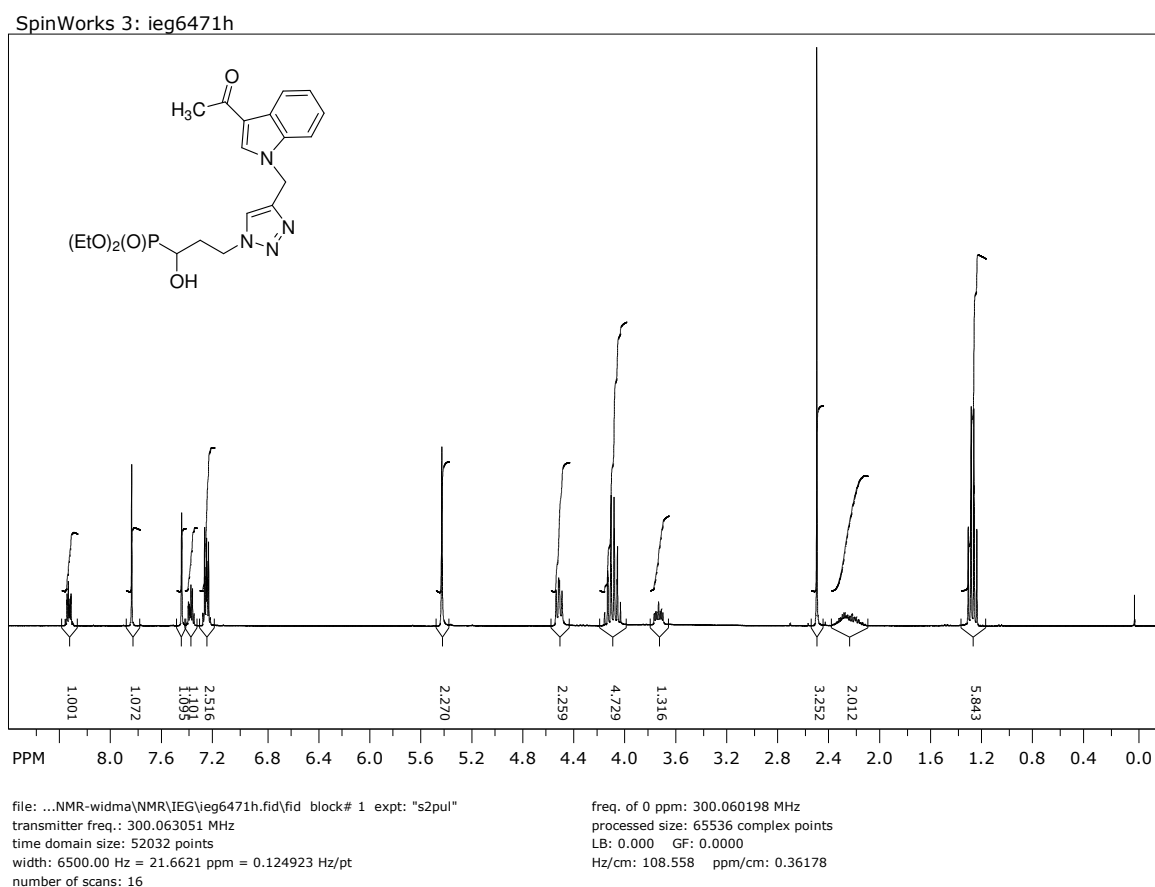

# <sup>13</sup>C NMR

SpinWorks 3: ieg6471C

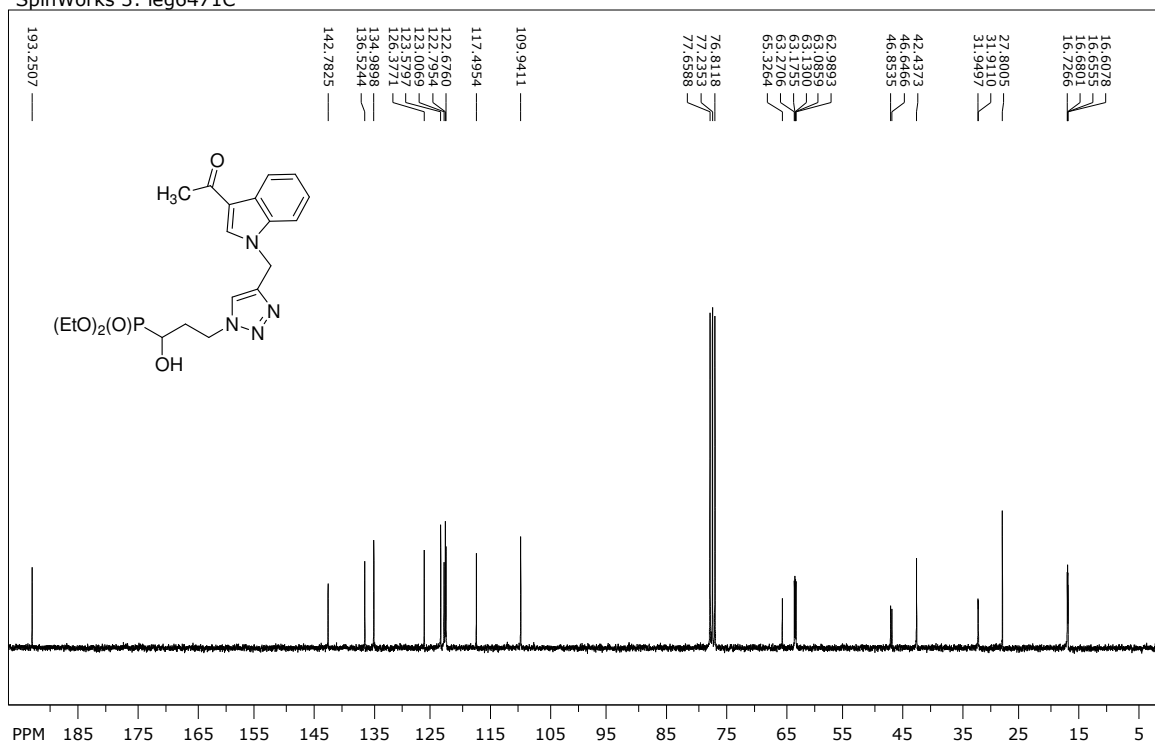

file: ...NMR-widma\NMR\IEG\ieg6471C.fid\fid block# 1 expt: "s2pul"  
transmitter freq.: 75.457729 MHz  
time domain size: 68096 points  
width: 18761.73 Hz = 248.6389 ppm = 0.275519 Hz/pt  
number of scans: 1024

freq. of 0 ppm: 75.450191 MHz  
processed size: 131072 complex points  
LB: 1.000 GF: 0.0000  
Hz/cm: 593.797 ppm/cm: 7.86927

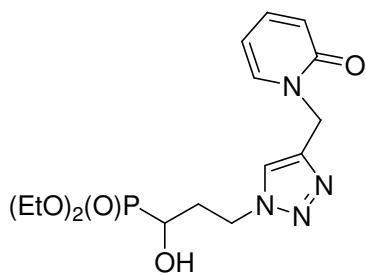

*Diethyl 1-hydroxy-3-{4-[(2-oxopyridin-1-yl)methyl]-1H-1,2,3-triazol-1-yl}propylphosphonate* **261**. Brown oil; IR (film):  $\nu = 3401, 2986, 2912, 1656, 1224; 1025 \text{ cm}^{-1}$ ;  $^1\text{H NMR}$  (300 MHz,  $\text{CDCl}_3$ ):  $\delta = 7.90$  (s, 1H,  $\text{HC5}'$ ); 7.63 (ddd,  $J = 6.8 \text{ Hz}, J = 2.0 \text{ Hz}, J = 0.6 \text{ Hz}$ , 1H); 7.34 (ddd,  $J = 9.1 \text{ Hz}, J = 6.8 \text{ Hz}, J = 2.0 \text{ Hz}$ , 1H); 6.55 (ddd,  $J = 9.1 \text{ Hz}, J = 1.3 \text{ Hz}, J = 0.6 \text{ Hz}$ , 1H); 6.21 (dt,  $J = 6.8 \text{ Hz}, J = 1.3 \text{ Hz}$ , 1H); 5.22 (AB,  $J = 14.3 \text{ Hz}$ , 1H,  $\text{CH}_a\text{H}_b$ ); 5.16 (AB,  $J = 14.3 \text{ Hz}$ , 1H,  $\text{CH}_a\text{H}_b$ ); 4.86 (s, brs, 1H, OH); 4.60–4.45 (m, 2H,  $\text{PCCCH}_2$ ); 4.22–4.09 (m, 4H,  $2 \times \text{POCH}_2\text{CH}_3$ ); 3.79 (ddd,  $J = 10.8 \text{ Hz}, J = 6.2 \text{ Hz}, J = 3.2 \text{ Hz}$ , 1H,  $\text{PCH}(\text{OH})$ ); 2.41–2.16 (m, 2H,  $\text{PCCH}_2$ ); 1.33 (t,  $J = 6.9 \text{ Hz}$ , 3H,  $\text{POCH}_2\text{CH}_3$ ); 1.30 (t,  $J = 6.9 \text{ Hz}$ , 3H,  $\text{POCH}_2\text{CH}_3$ );  $^{13}\text{C NMR}$  (75.5 MHz,  $\text{CDCl}_3$ ):  $\delta = 162.4$  (s,  $\text{C}=\text{O}$ ); 142.3 (s,  $\text{HC}=\text{C}$ ); 140.3; 137.9; 124.9 (s,  $\text{HC}=\text{C}$ ); 120.6; 106.9; 64.0 (d,  $J = 165.8 \text{ Hz}$ , PC); 63.1 (d,  $J = 7.1 \text{ Hz}$ , POC); 62.9 (d,  $J = 7.1 \text{ Hz}$ , POC); 46.6 (d,  $J = 16.0 \text{ Hz}$ , PCCC); 44.8; 31.9 (d,  $J = 3.1 \text{ Hz}$ , PCC); 16.7 (d,  $J = 5.2 \text{ Hz}$ , POCC); 16.6 (d,  $J = 5.2 \text{ Hz}$ , POCC);  $^{31}\text{P NMR}$  (121.5 MHz,  $\text{CDCl}_3$ ):  $\delta = 24.85$  ppm. Anal. Calcd. for  $\text{C}_{15}\text{H}_{23}\text{N}_4\text{O}_5\text{P}$ : C, 48.65; H, 6.26; N, 15.13. Found: C, 48.76; H, 6.12; N, 15.03.

# <sup>1</sup>H NMR

SpinWorks 3: ieg6801H

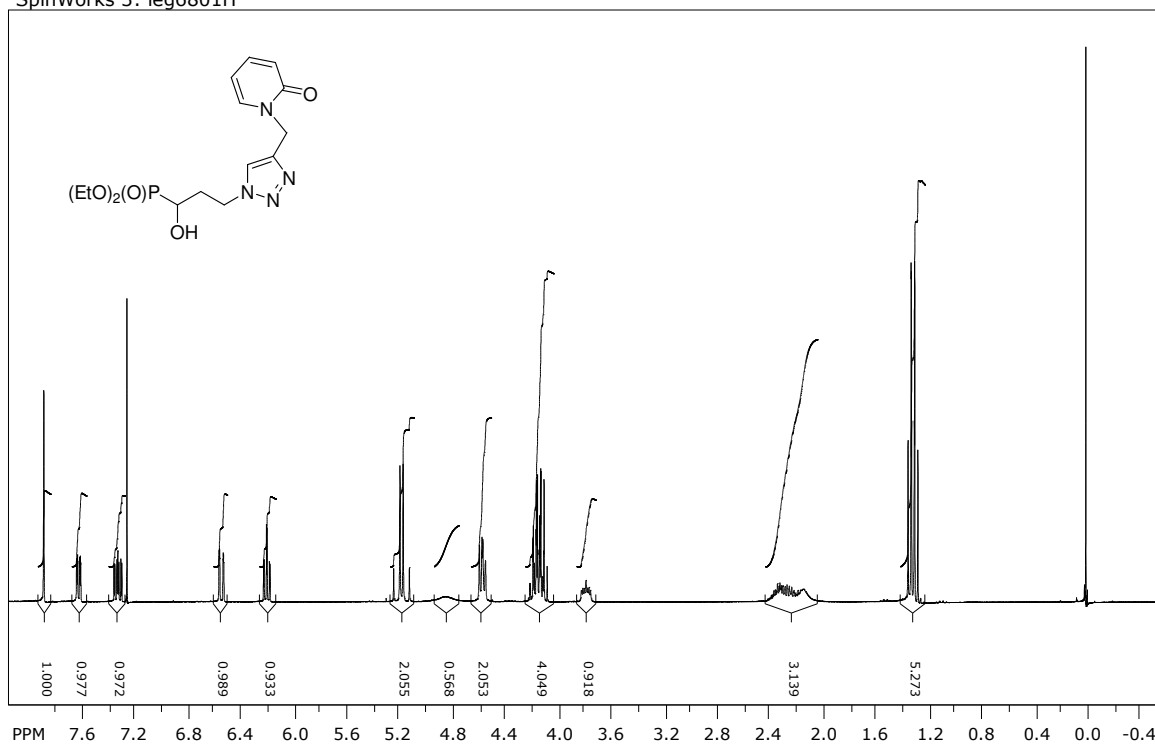

file: ...NMR-widma\NMR\IEG\ieg6801H.fid\fid block# 1 expt: "s2pul"  
transmitter freq.: 300.063051 MHz  
time domain size: 52032 points  
width: 6500.00 Hz = 21.6621 ppm = 0.124923 Hz/pt  
number of scans: 16

freq. of 0 ppm: 300.060197 MHz  
processed size: 65536 complex points  
LB: 0.000 GF: 0.0000  
Hz/cm: 105.036 ppm/cm: 0.35005



# <sup>13</sup>C NMR

SpinWorks 3: ieg6801C

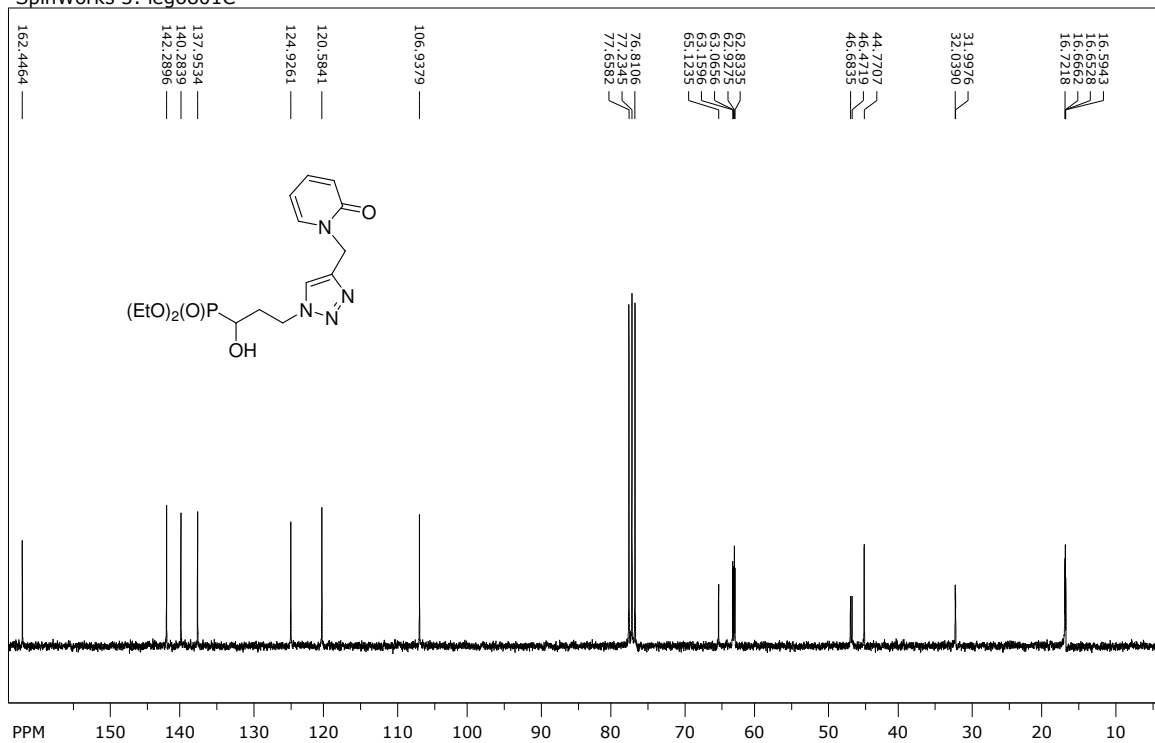

file: ...NMR-widma\NMR\IEG\ieg6801c.fid\fid block# 1 expt: "s2pul"  
transmitter freq.: 75.457729 MHz  
time domain size: 68096 points  
width: 18761.73 Hz = 248.6389 ppm = 0.275519 Hz/pt  
number of scans: 624

freq. of 0 ppm: 75.450192 MHz  
processed size: 131072 complex points  
LB: 1.000 GF: 0.0000  
Hz/cm: 486.758 ppm/cm: 6.45074

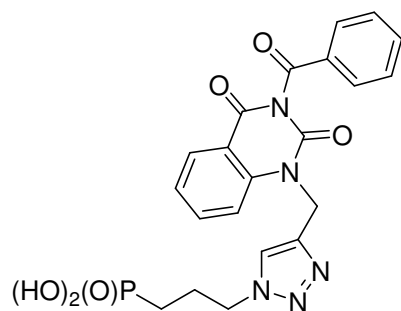

3-(4-([3-Benzoyl-2,4-dioxypyrimidin-1-yl]methyl)-1H-1,2,3-triazol-1-yl)propylphosphonic acid **31e**. White powder; m.p.: 130–133°C; IR (KBr):  $\nu = 3341, 3014, 2939, 1746, 1699, 1662; 1478; 1240, 987; 756; 674 \text{ cm}^{-1}$ ;  $^1\text{H}$  NMR (300 MHz,  $\text{CD}_3\text{OD}$ ):  $\delta = 8.16$  (dd,  $J = 7.9 \text{ Hz}, J = 1.6 \text{ Hz}, 1\text{H}$ ); 8.07 (s, 1H,  $\text{HC5'}$ ); 8.06–8.03 (m, 2H,  $2 \times o\text{-CH}$ ); 7.82 (ddd,  $J = 8.6 \text{ Hz}, J = 7.9 \text{ Hz}, J = 1.6 \text{ Hz}, 1\text{H}$ ); 7.77–7.68 (m, 2H,  $p\text{-CH}$ , H8); 7.60–7.54 (m, 2H,  $2 \times m\text{-CH}$ ); 7.32 (dt,  $J = 7.9 \text{ Hz}, J = 0.9 \text{ Hz}, 1\text{H}$ ); 5.49 (s, 2H,  $\text{CH}_2$ ); 4.49 (t,  $J = 7.0 \text{ Hz}, 2\text{H}$ ,  $\text{PCCCH}_2$ ); 2.29–2.10 (m, 2H,  $\text{PCCH}_2$ ); 1.73–1.67 (m, 2H,  $\text{PCH}_2$ );  $^{13}\text{C}$  NMR (151 MHz,  $\text{CD}_3\text{OD}$ ):  $\delta = 168.6$  (s,  $\text{C=O}$ ); 161.4 (s,  $\text{C=O}$ ); 149.6 (s,  $\text{C=O}$ ); 141.2 (s,  $\text{HC=C}$ ); 140.2; 136.2; 135.1; 131.6; 130.3; 129.1; 128.2; 125.3 (s,  $\text{HC=C}$ ); 123.7; 115.5; 114.9; 51.2 (d,  $J = 17.8 \text{ Hz}$ ,  $\text{PCCC}$ ); 37.7; 23.4 (d,  $J = 3.7 \text{ Hz}$ ,  $\text{PCC}$ ); 23.4 (d,  $J = 140.7 \text{ Hz}$ ,  $\text{PC}$ );  $^{31}\text{P}$  NMR (121 MHz,  $\text{CD}_3\text{OD}$ ):  $\delta = 29.05$  ppm. Anal. Calcd. for  $\text{C}_{21}\text{H}_{20}\text{N}_5\text{O}_6\text{P}$ : C, 53.73; H, 4.29; N, 14.92. Found: C, 53.55; H, 4.12; N, 15.13.

# <sup>1</sup>H NMR

SpinWorks 3: ieg6999H

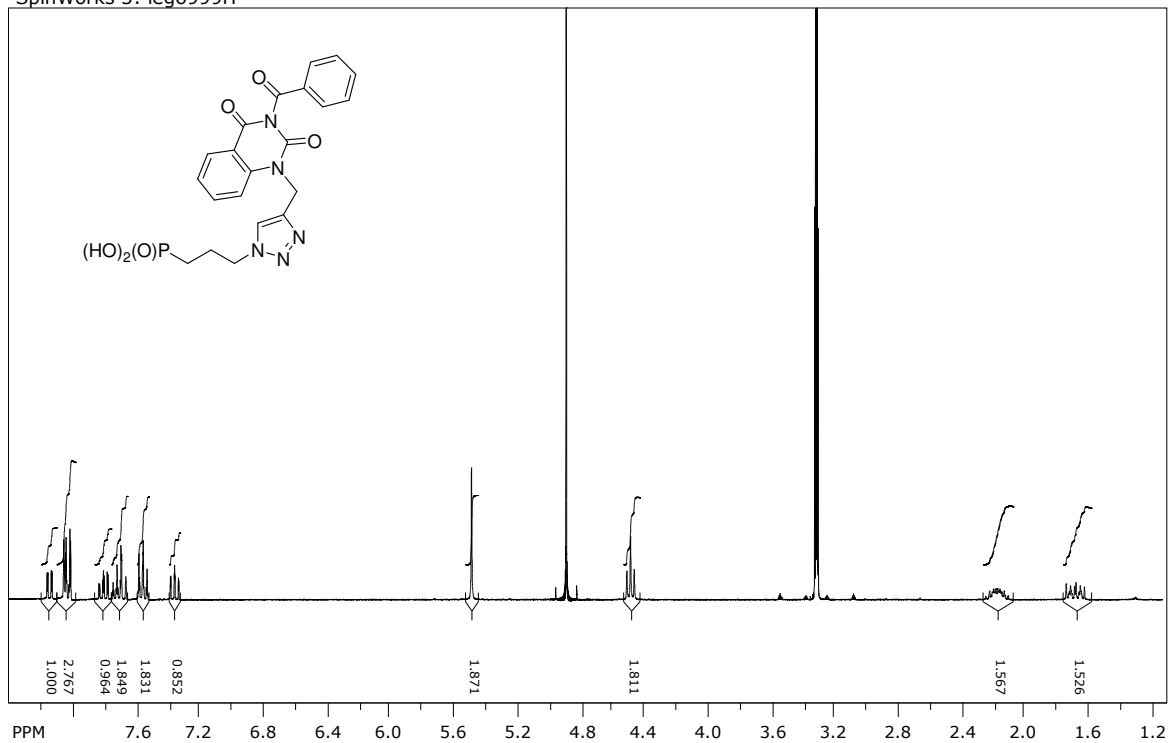

file: ...NMR-widma\NMR\IEG\ieg6999H.fid block# 1 expt: "s2pul"  
transmitter freq.: 300.064233 MHz  
time domain size: 52032 points  
width: 6500.00 Hz = 21.6620 ppm = 0.124923 Hz/pt  
number of scans: 16

freq. of 0 ppm: 300.061382 MHz  
processed size: 65536 complex points  
LB: 0.000 GF: 0.0000  
Hz/cm: 87.633 ppm/cm: 0.29205

# <sup>13</sup>C NMR

SpinWorks 3: no title

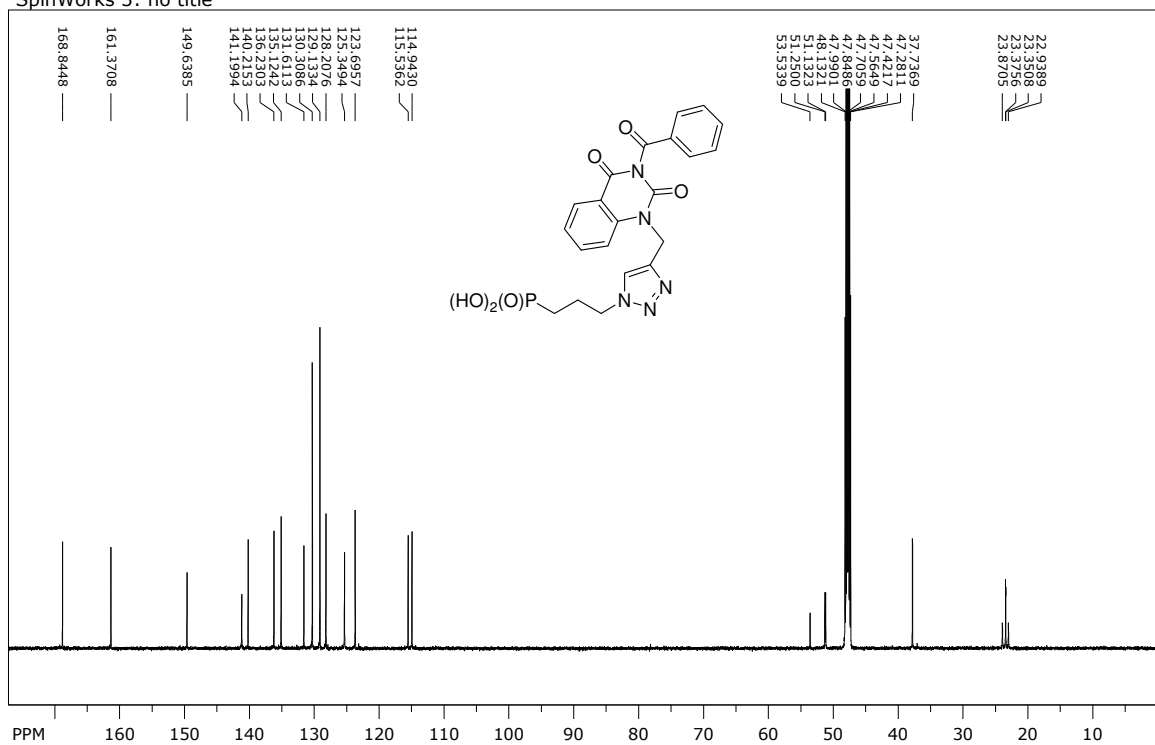

file: ...\\NMR-widma\\NMR\\IEG\\ieg-7056\\10\\fid expt: <zpgg30>  
transmitter freq.: 150.950591 MHz  
time domain size: 65536 points  
width: 36057.69 Hz = 238.8708 ppm = 0.550197 Hz/pt  
number of scans: 1024

freq. of 0 ppm: 150.935497 MHz  
processed size: 32768 complex points  
LB: 1.000 GF: 0.0000  
Hz/cm: 1074.548 ppm/cm: 7.11854

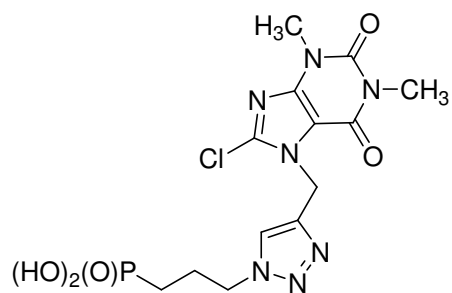

*3-{4-[(8-Chloro-1,3-dimethyl-2,6-dioxopurin-7-yl)methyl]-1H-1,2,3-triazol-1-yl}propylphosphonic acid* **31g**. White powder; m.p.: 216–220°C; solubility of **31g** in methanol or water was insufficient to measure the  $^{13}\text{C}$  NMR spectrum; IR (KBr):  $\nu = 3124, 2998, 2978, 1608, 1463, 1220, 1028, 968 \text{ cm}^{-1}$ ;  $^1\text{H}$  NMR (600 MHz,  $\text{CD}_3\text{OD}$ ):  $\delta = 8.09$  (s, 1H); 5.70 (s, 2H,  $\text{CH}_2$ ); 4.51 (t,  $J = 7.0$  Hz, 2H,  $\text{PCCCH}_2$ ); 3.37 (s, 3H,  $\text{CH}_3$ ); 3.34 (s, 3H,  $\text{CH}_3$ ); 2.17 (dqv,  $J = 14.0$  Hz,  $J = 7.0$  Hz, 2H,  $\text{PCCH}_2$ ); 1.70 (dt,  $J = 19.2$  Hz,  $J = 7.0$  Hz, 2H,  $\text{PCH}_2$ );  $^{31}\text{P}$  NMR (243 MHz,  $\text{CD}_3\text{OD}$ ):  $\delta = 27.81$  ppm. Anal. Calcd. for  $\text{C}_{13}\text{H}_{17}\text{ClN}_5\text{O}_5\text{P}$ : C, 37.38; H, 4.10; N, 23.47. Found: C, 37.60; H, 4.32; N, 23.33.

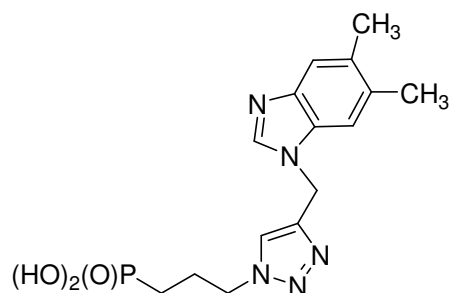

*3-{4-[(5,6-Dimethyl-benzimidazol-1-yl)methyl]-1H-1,2,3-triazol-1-yl}propylphosphonic acid* **31j**. White powder; m.p.: 148–151°C; IR (KBr):  $\nu = 3100, 2999, 2948, 2889, 1244, 1040, 965 \text{ cm}^{-1}$ ;  $^1\text{H}$  NMR (600 MHz,  $\text{CD}_3\text{OD}$ ):  $\delta = 9.44$  (s, 1H); 8.31 (s, 1H); 7.78 (s, 1H); 7.63 (s, 1H); 5.86 (s, 2H,  $\text{CH}_2$ ); 4.55 (t,  $J = 7.0$  Hz, 2H,  $\text{PCCCH}_2$ ); 2.50 (s, 3H,  $\text{CH}_3$ ); 2.47 (s, 3H,  $\text{CH}_3$ ); 2.22 (dqv,  $J = 14.3$  Hz,  $J = 7.0$  Hz, 2H,  $\text{PCCH}_2$ ); 1.70 (dt,  $J = 18.7$  Hz,  $J = 7.0$  Hz, 2H,  $\text{PCH}_2$ );  $^{13}\text{C}$  NMR (151 MHz,  $\text{CD}_3\text{OD}$ ):  $\delta = 140.1; 139.6; 137.4; 137.1; 129.5; 129.4; 125.1; 114.0; 112.7; 50.4$  (d,  $J = 18.1$  Hz,  $\text{PCCC}$ ); 41.6; 23.6 (d,  $J = 4.0$  Hz,  $\text{PCC}$ ); 23.5 (d,  $J = 139.2$  Hz,  $\text{PC}$ ); 19.3; 19.1;  $^{31}\text{P}$  NMR (243 MHz,  $\text{CD}_3\text{OD}$ ):  $\delta = 28.08$  ppm. Anal. Calcd. for  $\text{C}_{15}\text{H}_{20}\text{N}_5\text{O}_3\text{P}$ : C, 51.57; H, 5.77; N, 20.05. Found: C, 51.80; H, 5.52; N, 19.92.

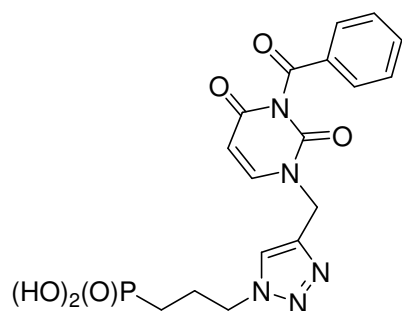

3-(4-([3-Benzoyl-2,4-dioxypyrimidin-1-yl]methyl)-1H-1,2,3-triazol-1-yl)propylphosphonic acid **31m**. Colourless oil; IR (film):  $\nu = 3396, 3010, 2983, 2967, 1665, 1654, 1436; 1237, 978, 782, 701 \text{ cm}^{-1}$ ;  $^1\text{H NMR}$  (300 MHz,  $\text{CD}_3\text{OD}$ ):  $\delta = 8.30$  (s, 1H,  $\text{HC}5'$ ); 7.98–7.94 (m, 2H,  $H_{\text{aromat}}$ ); 7.91 (d,  $J = 8.0$  Hz, 1H,  $\text{HC}=\text{CH}$ ); 7.75–7.69 (m, 1H,  $H_{\text{aromat}}$ ); 7.58–7.52 (m, 2H,  $H_{\text{aromat}}$ ); 5.86 (d,  $J = 8.0$  Hz, 1H,  $\text{HC}=\text{CH}$ ); 5.15 (s, 2H,  $\text{CH}_2$ ); 4.60 (t,  $J = 7.1$  Hz, 2H,  $\text{PCCCH}_2$ ); 2.29–2.18 (m, 2H,  $\text{PCCH}_2$ ); 1.83–1.71 (m, 2H,  $\text{PCH}_2$ );  $^{13}\text{C NMR}$  (151 MHz,  $\text{CD}_3\text{OD}$ ):  $\delta = 168.9$  (s,  $\text{C}=\text{O}$ ); 163.1 (s,  $\text{C}=\text{O}$ ); 150.0 (s,  $\text{C}=\text{O}$ ); 145.8; 140.4; 135.2; 131.4; 130.2; 129.2; 129.1; 128.3; 126.3; 101.6; 101.6; 51.5 (d,  $J = 17.9$  Hz,  $\text{PCCC}$ ); 42.4; 23.3 (s,  $J = 1.4$  Hz,  $\text{PCC}$ ); 23.4 (d,  $J = 146.8$  Hz,  $\text{PC}$ );  $^{31}\text{P NMR}$  (121 MHz,  $\text{CD}_3\text{OD}$ ):  $\delta = 29.63$  ppm. Anal. Calcd. for  $\text{C}_{15}\text{H}_{18}\text{N}_5\text{O}_6\text{P}\times\text{H}_2\text{O}$ : C, 46.69; H, 4.61; N, 16.01. Found: C, 46.74; H, 4.70; N, 15.94.

## $^1\text{H NMR}$

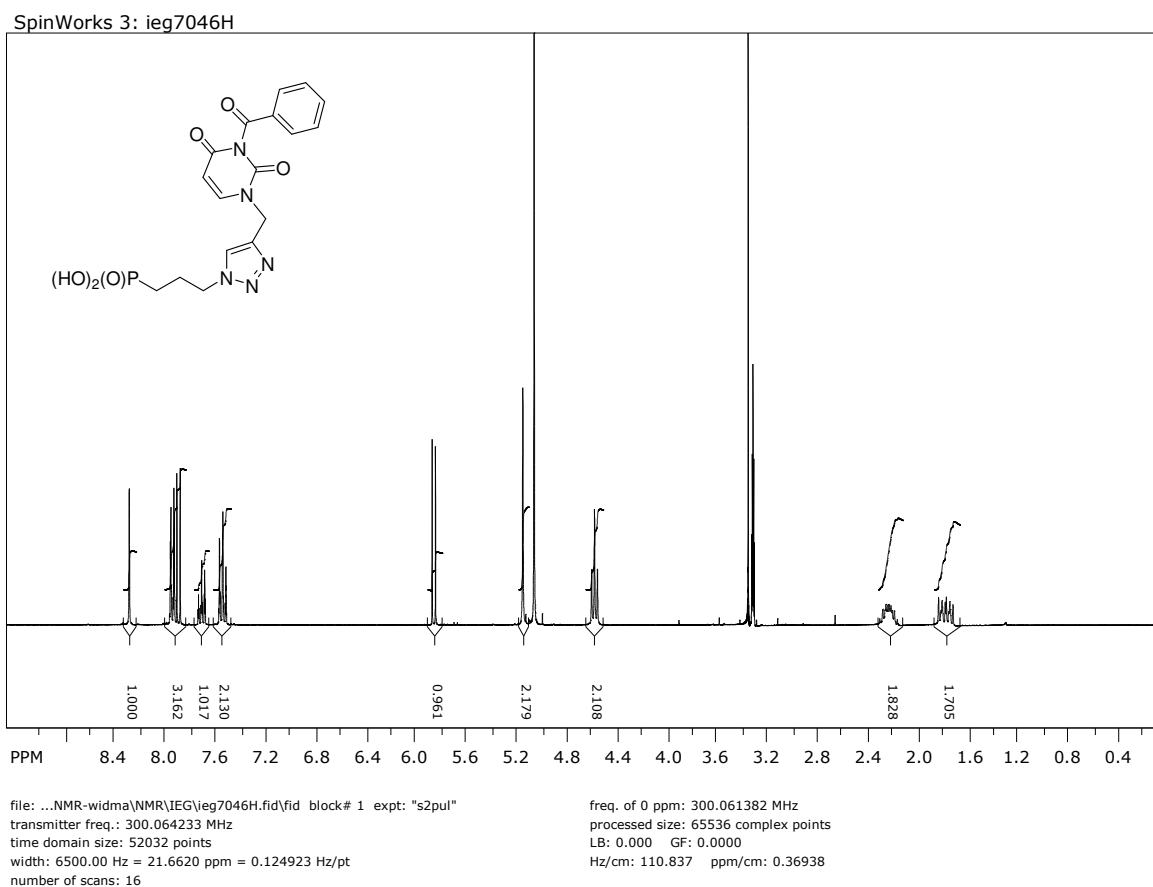

<sup>13</sup>C NMR

SpinWorks 3: no title

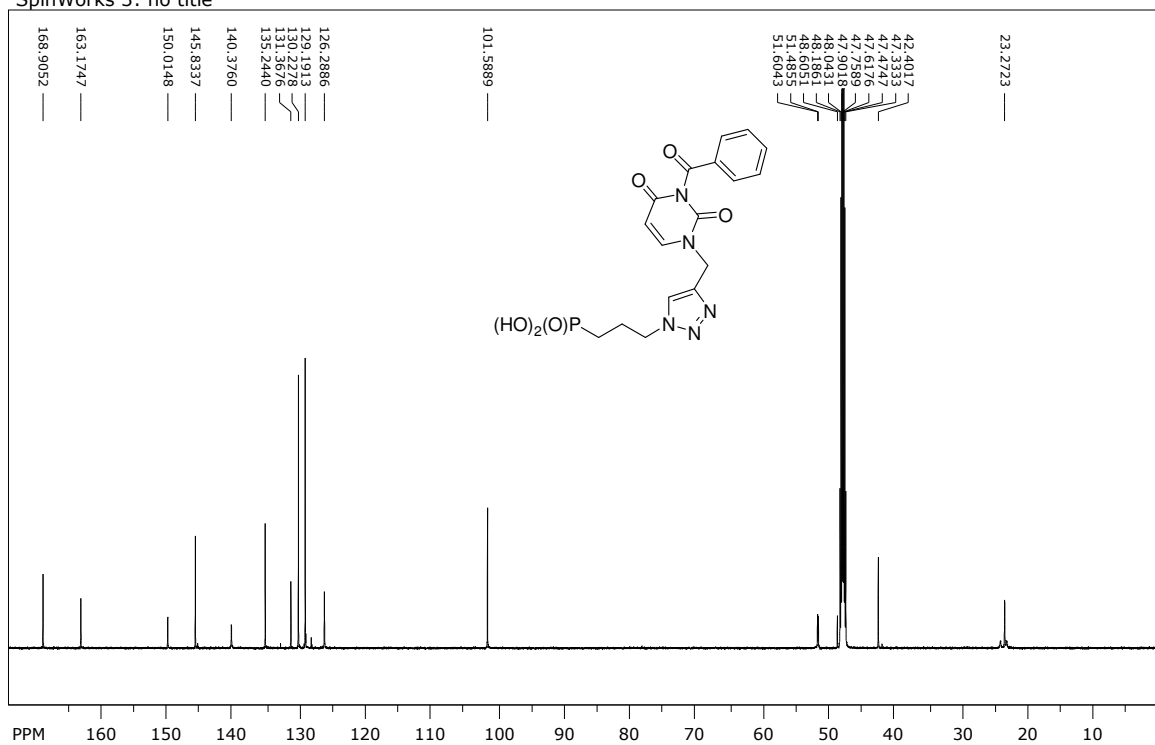

file: ...\\NMR-widma\\NMR\\IEG\\ieg-7055\\10\\fid expt: <zgpg30>  
transmitter freq.: 150.950591 MHz  
time domain size: 65536 points  
width: 36057.69 Hz = 238.8708 ppm = 0.550197 Hz/pt  
number of scans: 1024

freq. of 0 ppm: 150.935497 MHz  
processed size: 32768 complex points  
LB: 1.000 GF: 0.0000  
Hz/cm: 1055.011 ppm/cm: 6.98911

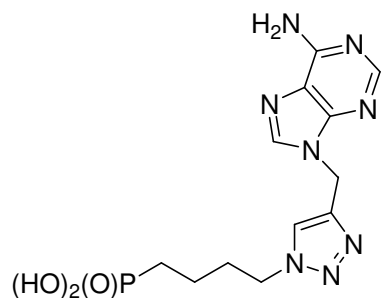

4-(4-([6-Aminopurin-9-yl]methyl)-1H-1,2,3-triazol-1-yl)butylphosphonic acid **32a**. White powder; m.p.: 217–220°C; solubility of **32a** in methanol or water was insufficient to measure the  $^{13}\text{C}$  NMR spectrum; IR (KBr):  $\nu = 3460, 3300, 3100, 2981, 2910, 2880, 1660, 1647, 1240, 1023\text{ cm}^{-1}$ ;  $^1\text{H}$  NMR (600 MHz,  $\text{CD}_3\text{OD}$ ):  $\delta = 8.45$  (s, 1H); 8.42 (s, 1H); 8.15 (s, 1H); 5.65 (s, 2H,  $\text{CH}_2$ ); 4.46 (t,  $J = 7.0\text{ Hz}$ , 2H,  $\text{PCCCCCH}_2$ ); 2.03 (qv,  $J = 7.0\text{ Hz}$ , 2H,  $\text{PCCCH}_2$ ); 1.77–1.72 (m, 2H,  $\text{PCH}_2$ ); 1.64–1.57 (m, 2H,  $\text{PCCH}_2$ );  $^{31}\text{P}$  NMR (243 MHz,  $\text{CD}_3\text{OD}$ ):  $\delta = 29.02\text{ ppm}$ . Anal. Calcd. for  $\text{C}_{12}\text{H}_{17}\text{N}_8\text{O}_3\text{P}$ : C, 40.91; H, 4.86; N, 31.81. Found: C, 40.79; H, 4.99; N, 31.69.

## $^1\text{H}$ NMR

SpinWorks 3: no title

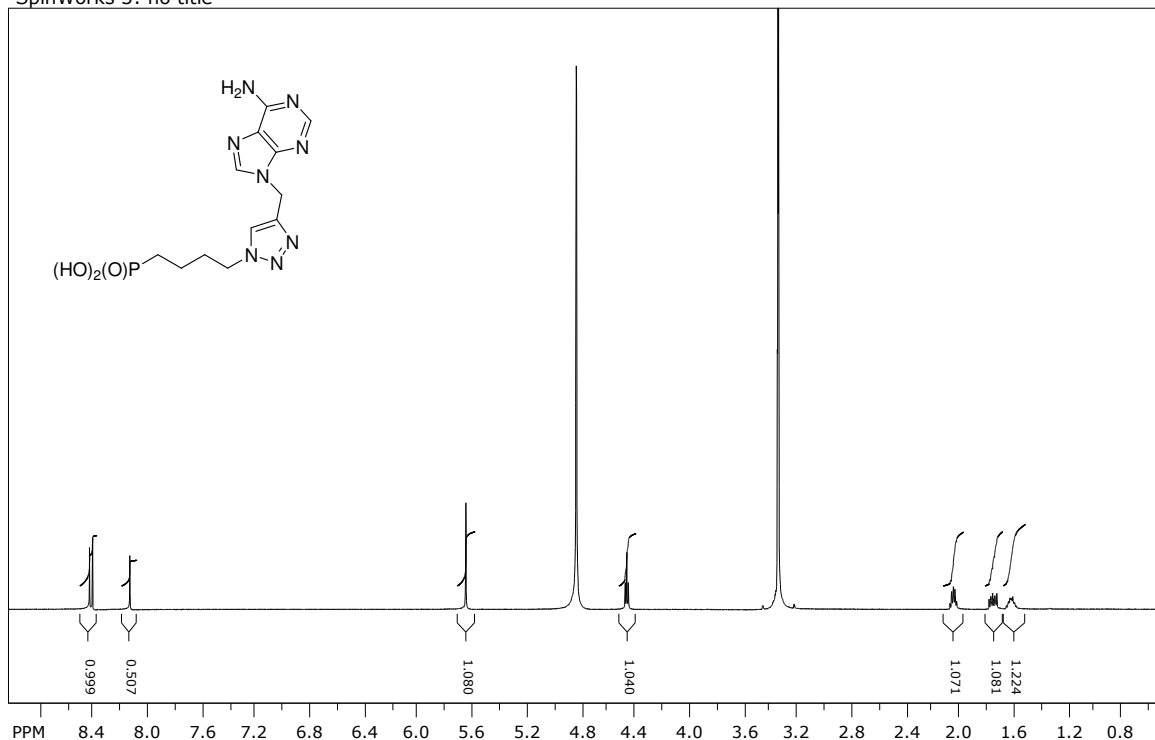

file: ...orota\Pulpit\U\ NMR\mpe0029\10\fid exp: <zg30>  
 transmitter freq.: 600.263707 MHz  
 time domain size: 65536 points  
 width: 12335.53 Hz = 20.5502 ppm = 0.188225 Hz/pt  
 number of scans: 16

freq. of 0 ppm: 600.260000 MHz  
 processed size: 32768 complex points  
 LB: 0.300 GF: 0.0000  
 Hz/cm: 205.623 ppm/cm: 0.34255



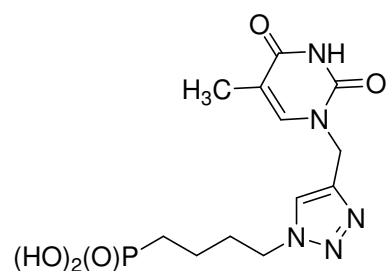

4-(4-([6-Aminopurin-9-yl]methyl)-1H-1,2,3-triazol-1-yl)butylphosphonic acid **31b**. Amorphous solid; m.p.: 224–226°C; Solubility of **31b** in methanol or water was insufficient to measure the  $^{13}\text{C}$  NMR spectrum; IR (KBr):  $\nu = 3445, 3102, 2980, 2910, 1668, 1223, 1025\text{ cm}^{-1}$ ;  $^1\text{H}$  NMR (600 MHz,  $\text{CD}_3\text{OD}$ ):  $\delta = 8.30$  (s, 1H,  $\text{HC}5'$ ); 7.60 (d,  $J = 1.0$  Hz, 1H,  $\text{HC}=\text{CCH}_3$ ); 5.08 (s, 2H,  $\text{CH}_2$ ); 4.55 (t,  $J = 7.1$  Hz, 2H,  $\text{PCCCCCH}_2$ ); 2.09 (qv,  $J = 7.0$  Hz, 2H,  $\text{PCCCH}_2$ ); 1.90 (d,  $J = 1.0$  Hz, 3H,  $\text{HC}=\text{CCH}_3$ ); 1.84–1.79 (m, 2H,  $\text{PCH}_2$ ); 1.70–1.63 (m, 2H,  $\text{PCCH}_2$ );  $^{31}\text{P}$  NMR (243 MHz,  $\text{CD}_3\text{OD}$ ):  $\delta = 29.86$  ppm. Anal. Calcd. for  $\text{C}_{12}\text{H}_{18}\text{N}_5\text{O}_5\text{P}$ : C, 41.99; H, 5.29; N, 20.40. Found: C, 42.12; H, 5.03; N, 20.34.

### $^1\text{H}$ NMR

SpinWorks 3:

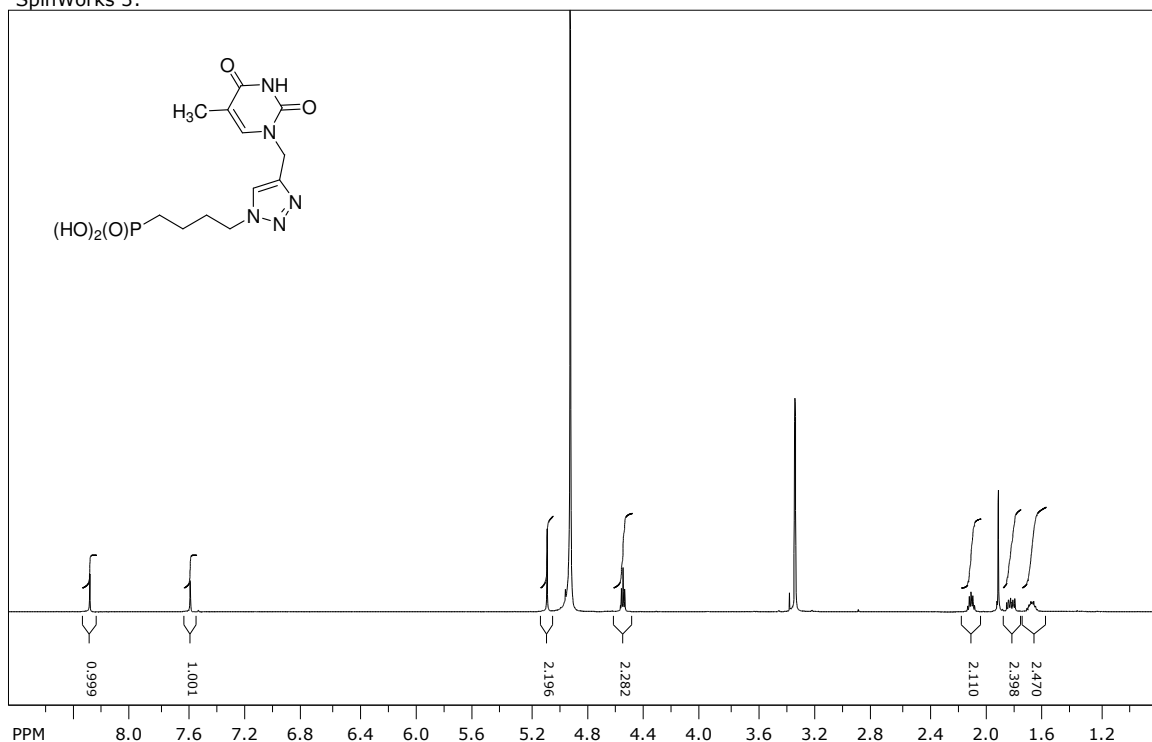

file: ...orota\Pulpit\U\ NMR\mpe-0028\1\fid expt: <zg30>  
 transmitter freq.: 600.263707 MHz  
 time domain size: 65536 points  
 width: 12335.53 Hz = 20.5502 ppm = 0.188225 Hz/pt  
 number of scans: 16

freq. of 0 ppm: 600.260000 MHz  
 processed size: 32768 complex points  
 LB: 0.300 GF: 0.0000  
 Hz/cm: 195.212 ppm/cm: 0.32521

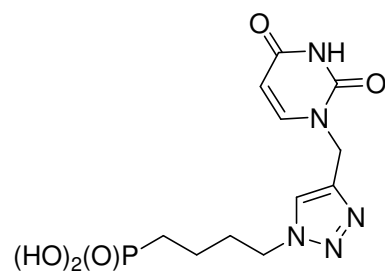

4-(4-([2,4-Dioxypyrimidin-1-yl]methyl)-1H-1,2,3-triazol-1-yl)butylphosphonic acid **32c**. Amorphous solid; m.p.: 204–206°C; IR (KBr):  $\nu = 3440, 3112, 2980, 2942, 1667, 1219, 1020 \text{ cm}^{-1}$ ;  $^1\text{H}$  NMR (600 MHz,  $\text{CD}_3\text{OD}$ ):  $\delta = 8.27$  (s, 1H, HC5'); 7.74 (d,  $J = 7.9$  Hz, 1H, HC=CH); 5.71 (d,  $J = 7.9$  Hz, 1H, HC=CH); 5.01 (s, 2H,  $\text{CH}_2$ ); 4.39 (t,  $J = 7.0$  Hz, 2H, PCCCC $\text{H}_2$ ); 2.06 (qv,  $J = 7.3$  Hz, 2H, PCCC $\text{H}_2$ ); 1.84–1.78 (m, 2H, PCC $\text{H}_2$ ); 1.70–1.62 (m, 2H, PCH $_2$ );  $^{13}\text{C}$  NMR (151 MHz,  $\text{CD}_3\text{OD}$ ):  $\delta = 166.5$  (s, C=O); 151.9 (s, C=O); 146.6; 141.5; 125.5; 102.1; 50.5; 43.0; 30.6 (d,  $J = 16.7$  Hz, PCCC); 25.5 (d,  $J = 135.3$  Hz, PC); 19.0 (d,  $J = 4.5$  Hz, PCC);  $^{31}\text{P}$  NMR (243 MHz,  $\text{CD}_3\text{OD}$ ):  $\delta = 29.81$  ppm. Anal. Calcd. for  $\text{C}_{11}\text{H}_{16}\text{N}_5\text{O}_5\text{P}$ : C, 40.13; H, 4.90; N, 21.27. Found: C, 40.35; H, 4.68; N, 21.50.

## $^1\text{H}$ NMR

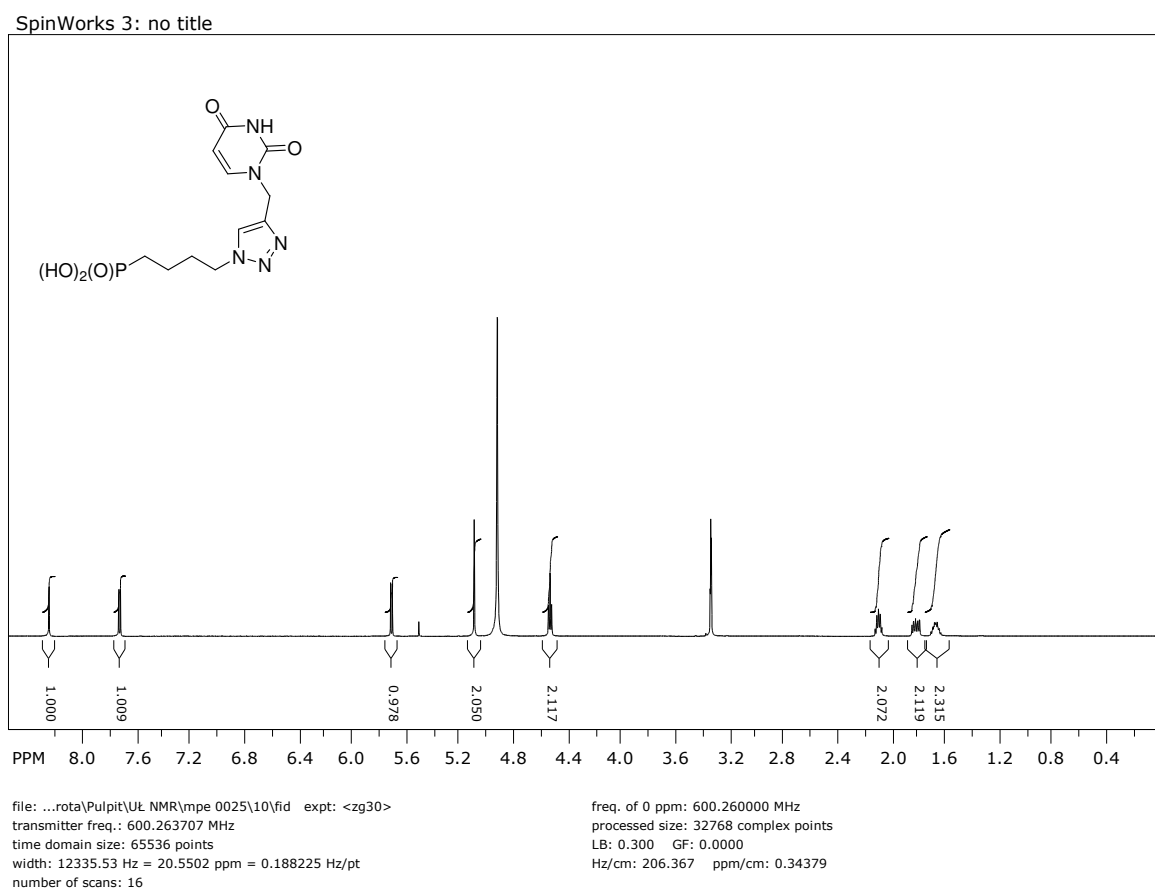

# <sup>13</sup>C NMR

SpinWorks 3: no title

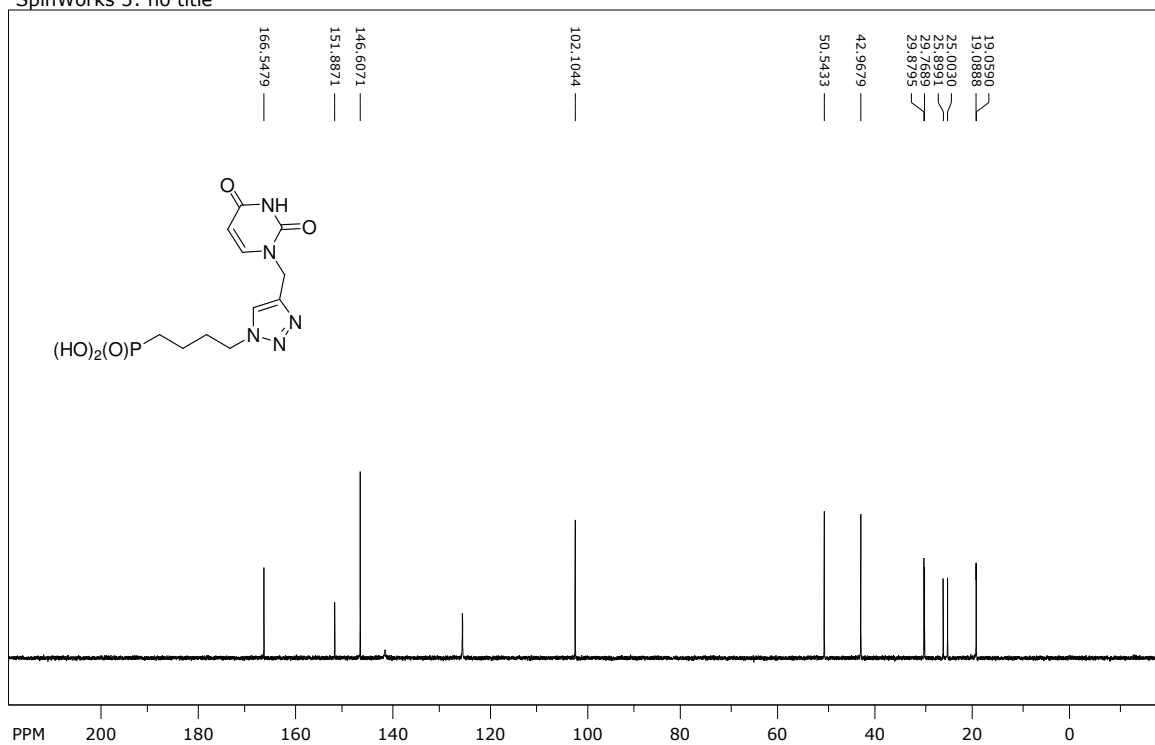

file: ...rota\Pulpit\WŁ NMR\mpe-0027\10\fid exp: <zpgg30>  
transmitter freq.: 150.950591 MHz  
time domain size: 65536 points  
width: 36057.69 Hz = 238.8708 ppm = 0.550197 Hz/pt  
number of scans: 512

freq. of 0 ppm: 150.935497 MHz  
processed size: 32768 complex points  
LB: 1.000 GF: 0.0000  
Hz/cm: 1442.308 ppm/cm: 9.55483

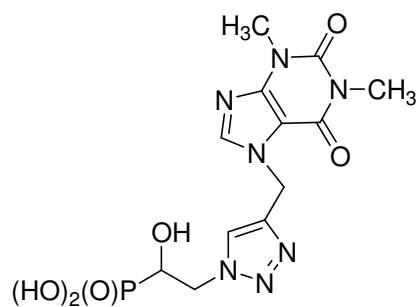

*3-{4-[(1,3-Dimethyl-2,6-dioxopurin-7-yl)methyl]-1H-1,2,3-triazol-1-yl}-1-hydroxyethylphosphonic acid* **33i**. White powder; m.p.: <244°C; solubility of **33i** in methanol or water was insufficient to measure the  $^{13}\text{C}$  NMR spectrum; IR (KBr):  $\nu = 3344, 3102, 2986, 1699, 1672, 1220, 1015$   $\text{cm}^{-1}$ ;  $^1\text{H}$  NMR (300 MHz,  $\text{CD}_3\text{OD}$ ):  $\delta = 8.19$  (s, 1H); 8.17 (s, 1H); 5.69 (s, 2H,  $\text{CH}_2$ ); 4.80 (ddd,  $J = 14.2$  Hz,  $J = 4.0$  Hz,  $J = 2.7$  Hz, 1H,  $\text{PCCH}_a\text{H}_b$ ); 4.51 (ddd,  $J = 14.2$  Hz,  $J = 10.3$  Hz,  $J = 5.8$  Hz, 1H,  $\text{PCCH}_a\text{H}_b$ ); 4.17 (dt,  $J = 10.3$  Hz,  $J = 2.7$  Hz, 1H,  $\text{PCH}(\text{OH})$ ); 3.53 (s, 3H,  $\text{CH}_3$ ); 3.35 (s, 3H,  $\text{CH}_3$ );  $^{31}\text{P}$  NMR (121 MHz,  $\text{CD}_3\text{OD}$ ):  $\delta = 19.61$  ppm. Anal. Calcd. for  $\text{C}_{12}\text{H}_{16}\text{N}_7\text{O}_6\text{P}$ : C, 37.41; H, 4.19; N, 25.45. Found: C, 37.56; H, 4.28; N, 25.30.

## $^1\text{H}$ NMR

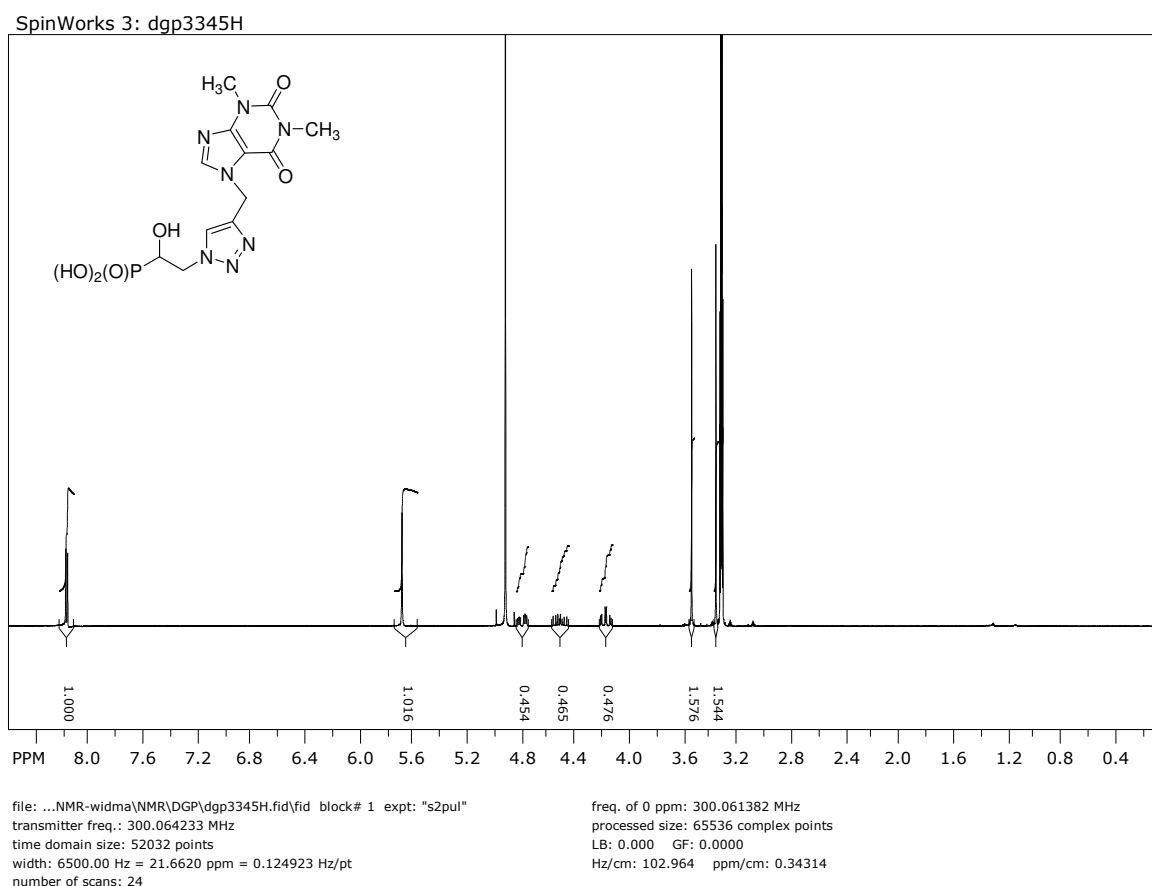

Supplement: mmc1.pdf [file mmc1.pdf]
